# Supplementary material for: Plant Species as Potential Forage for Honey Bees in the Al-Baha Mountain Region in Southwestern Saudi Arabia
Source: MDPI journal article supplement (doi:10.3390/plants12061402), 2023-03-22

# ***Abutilon pannosum***

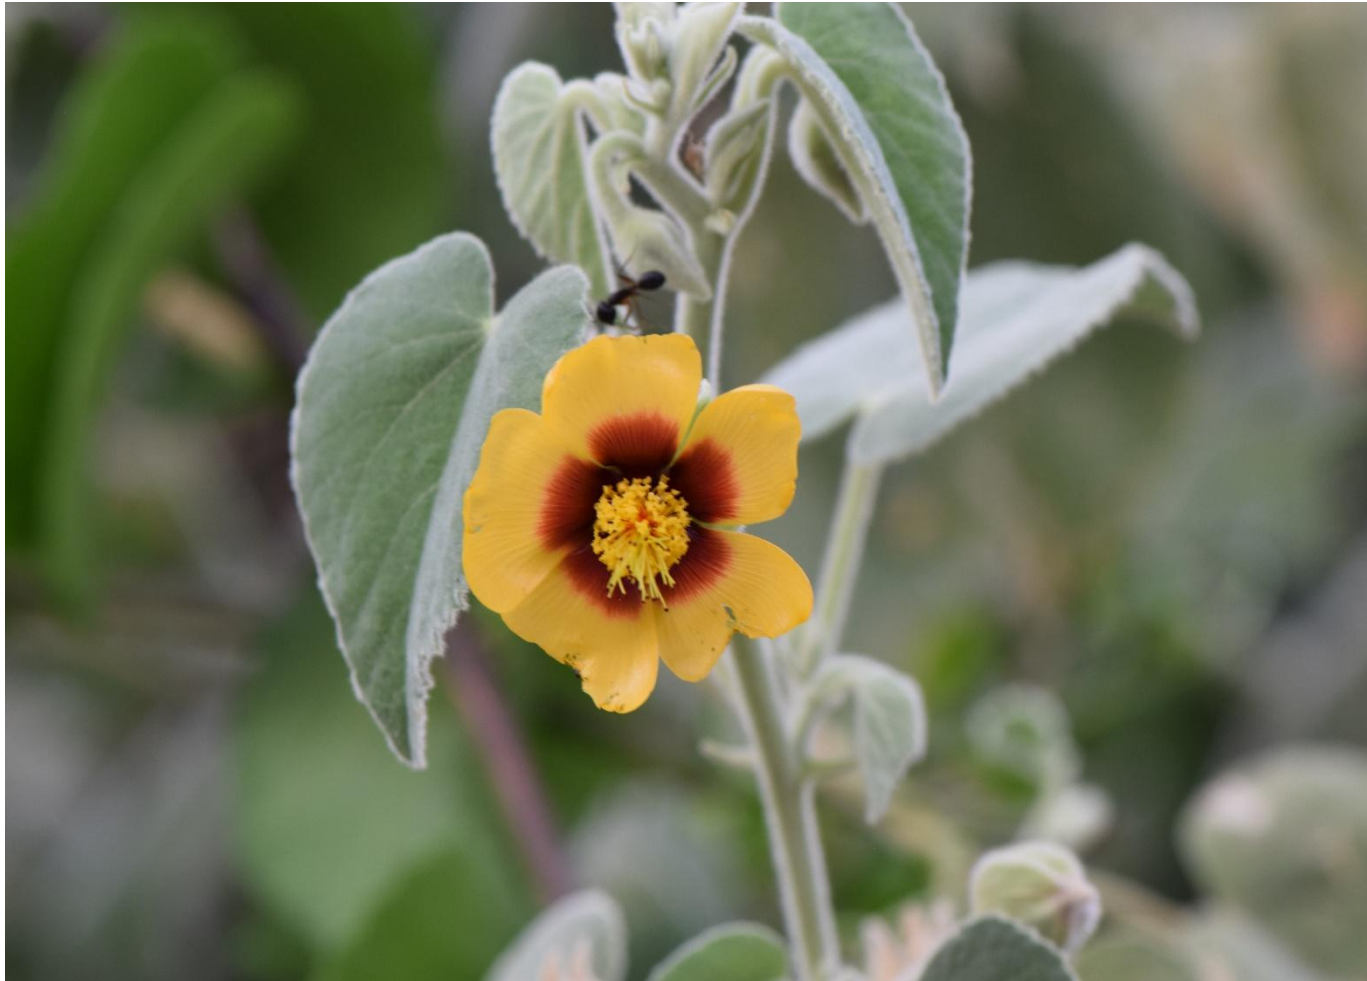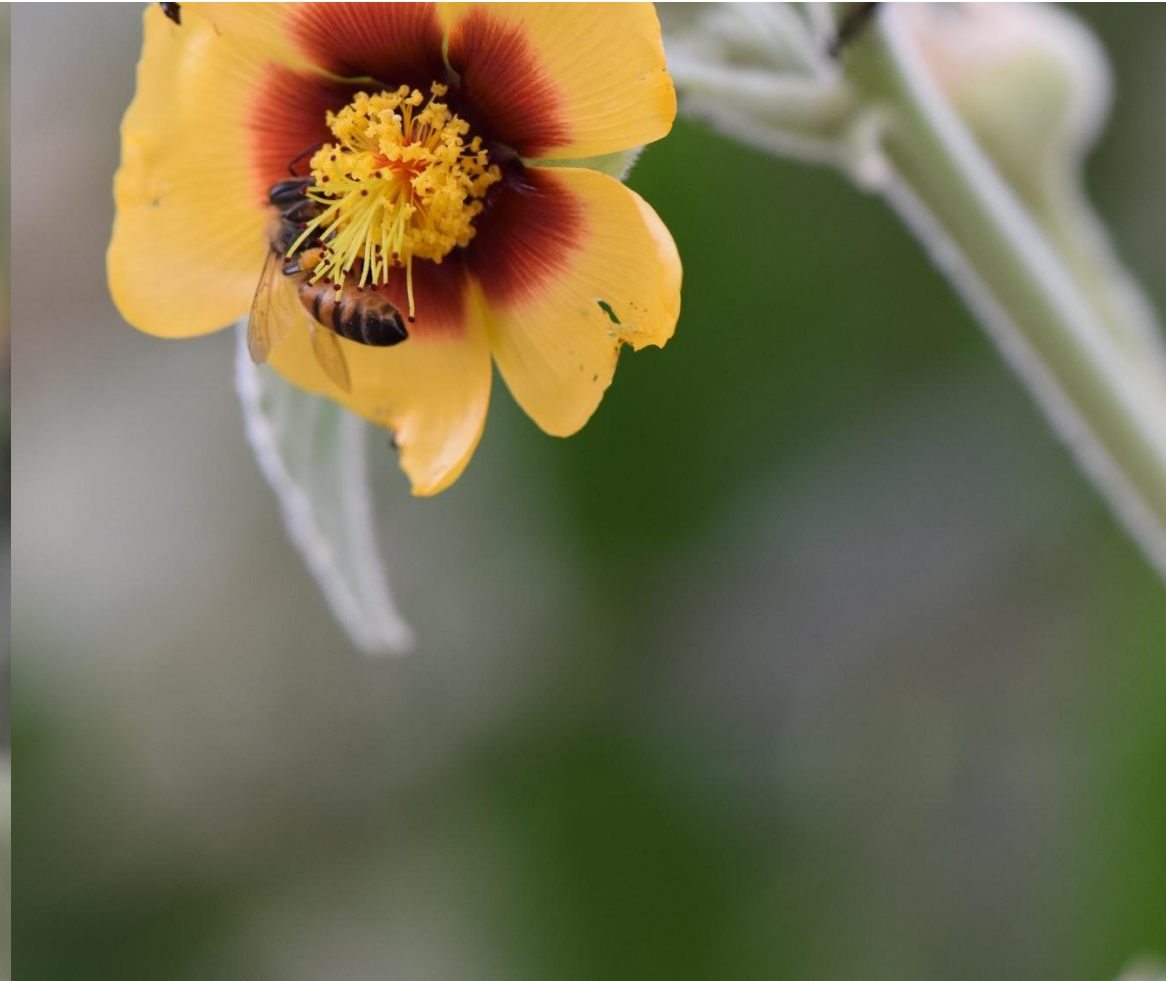

# *Achyranthes aspera*

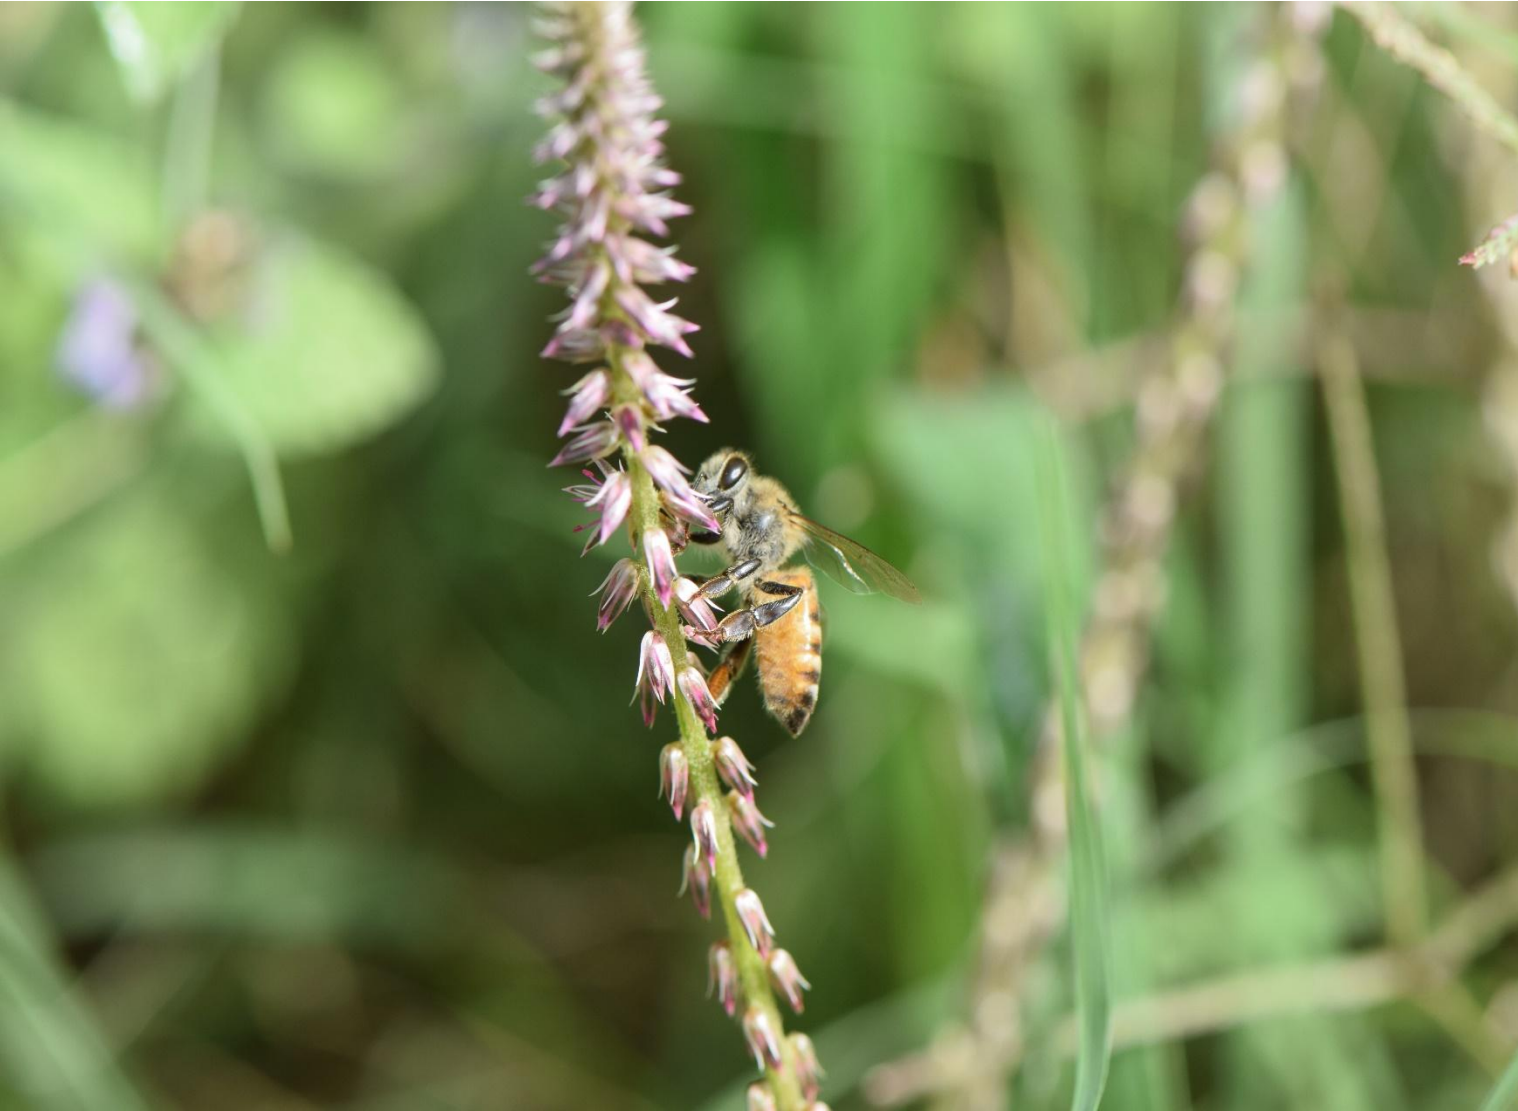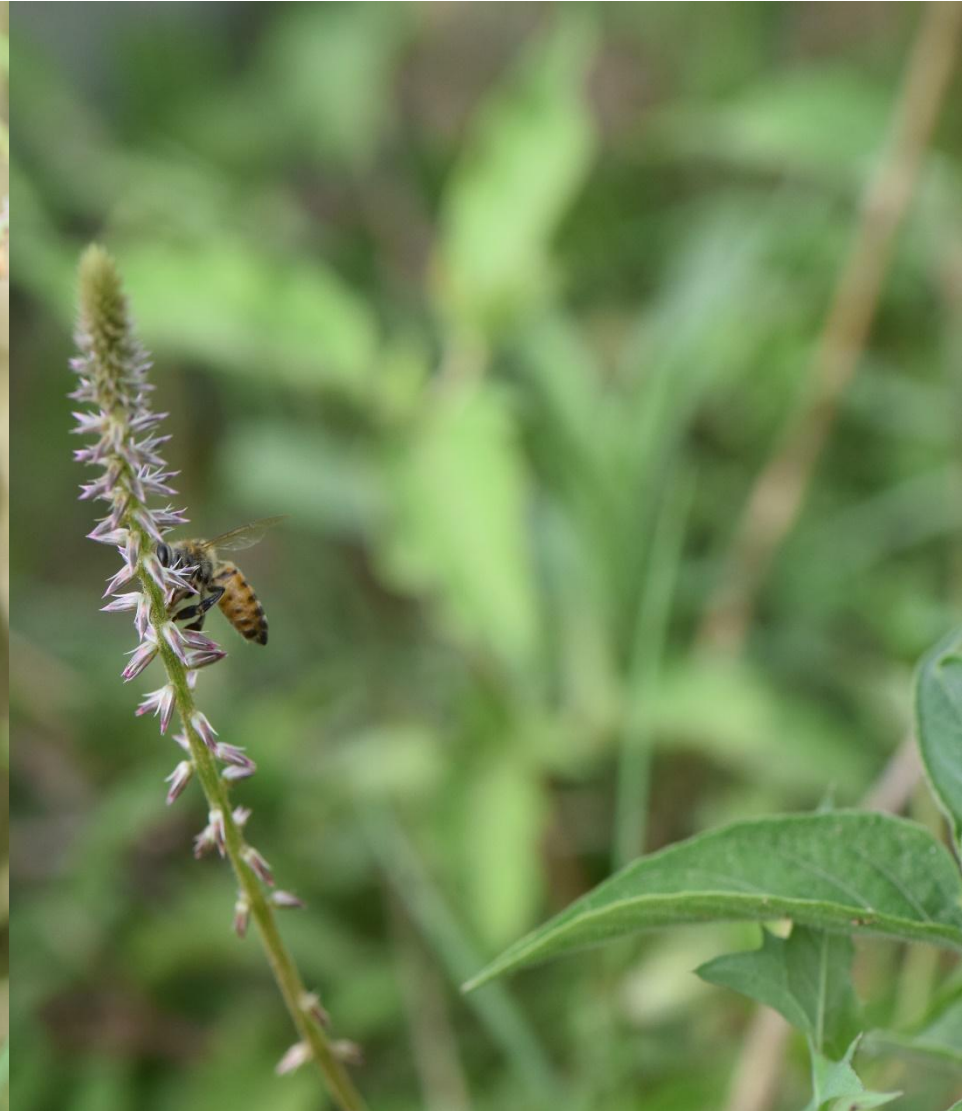



# ***Nepeta deflersiana***

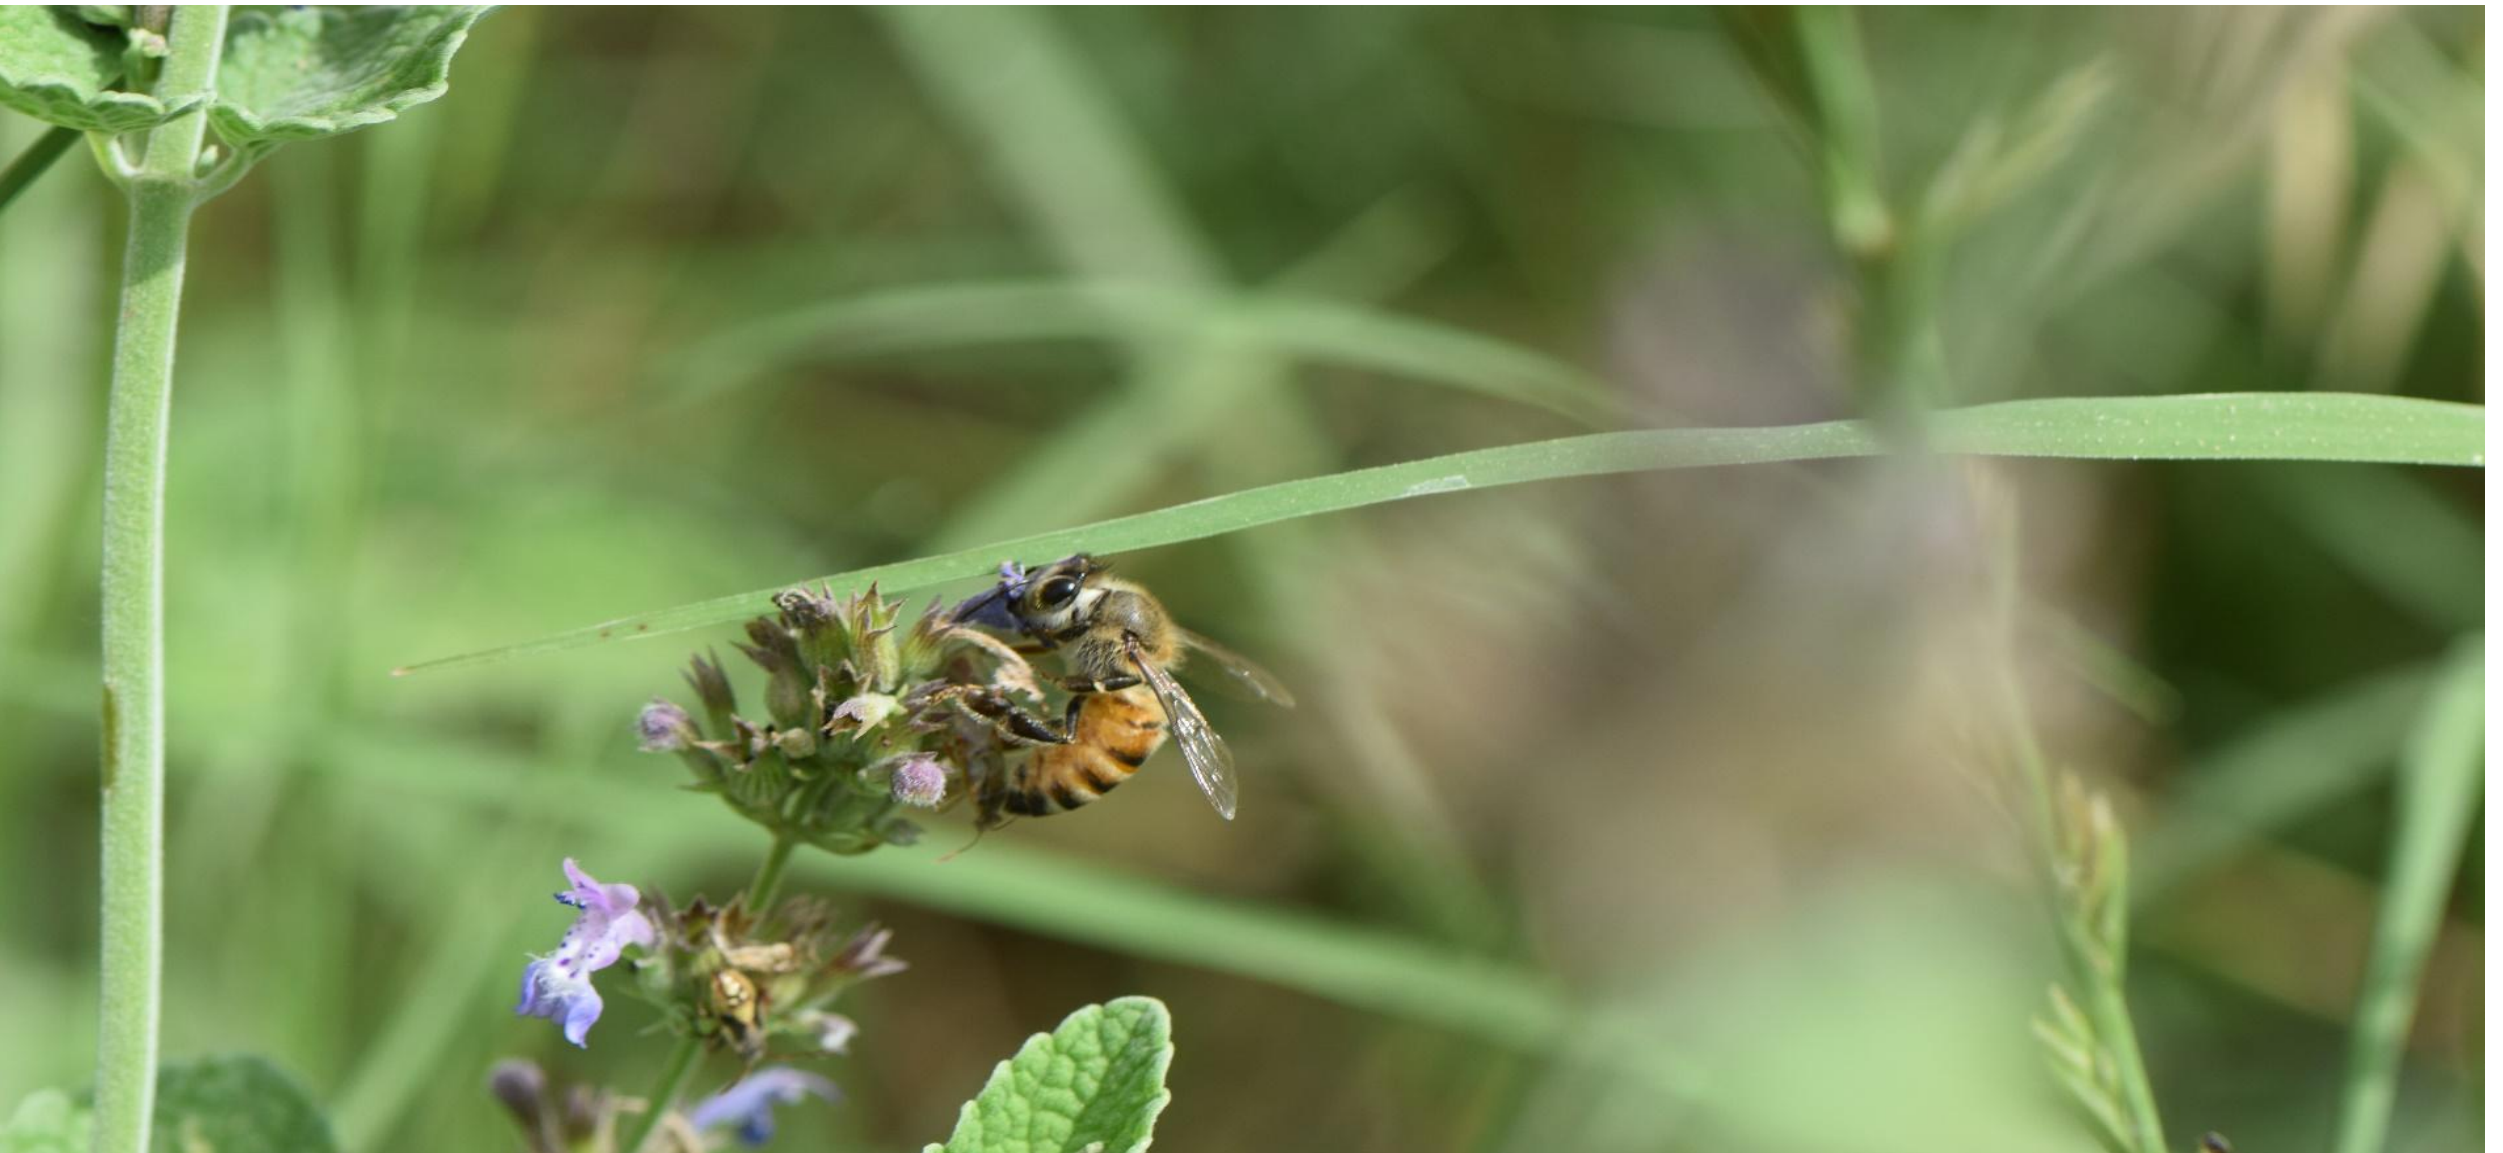



# *Aloe castellorum*

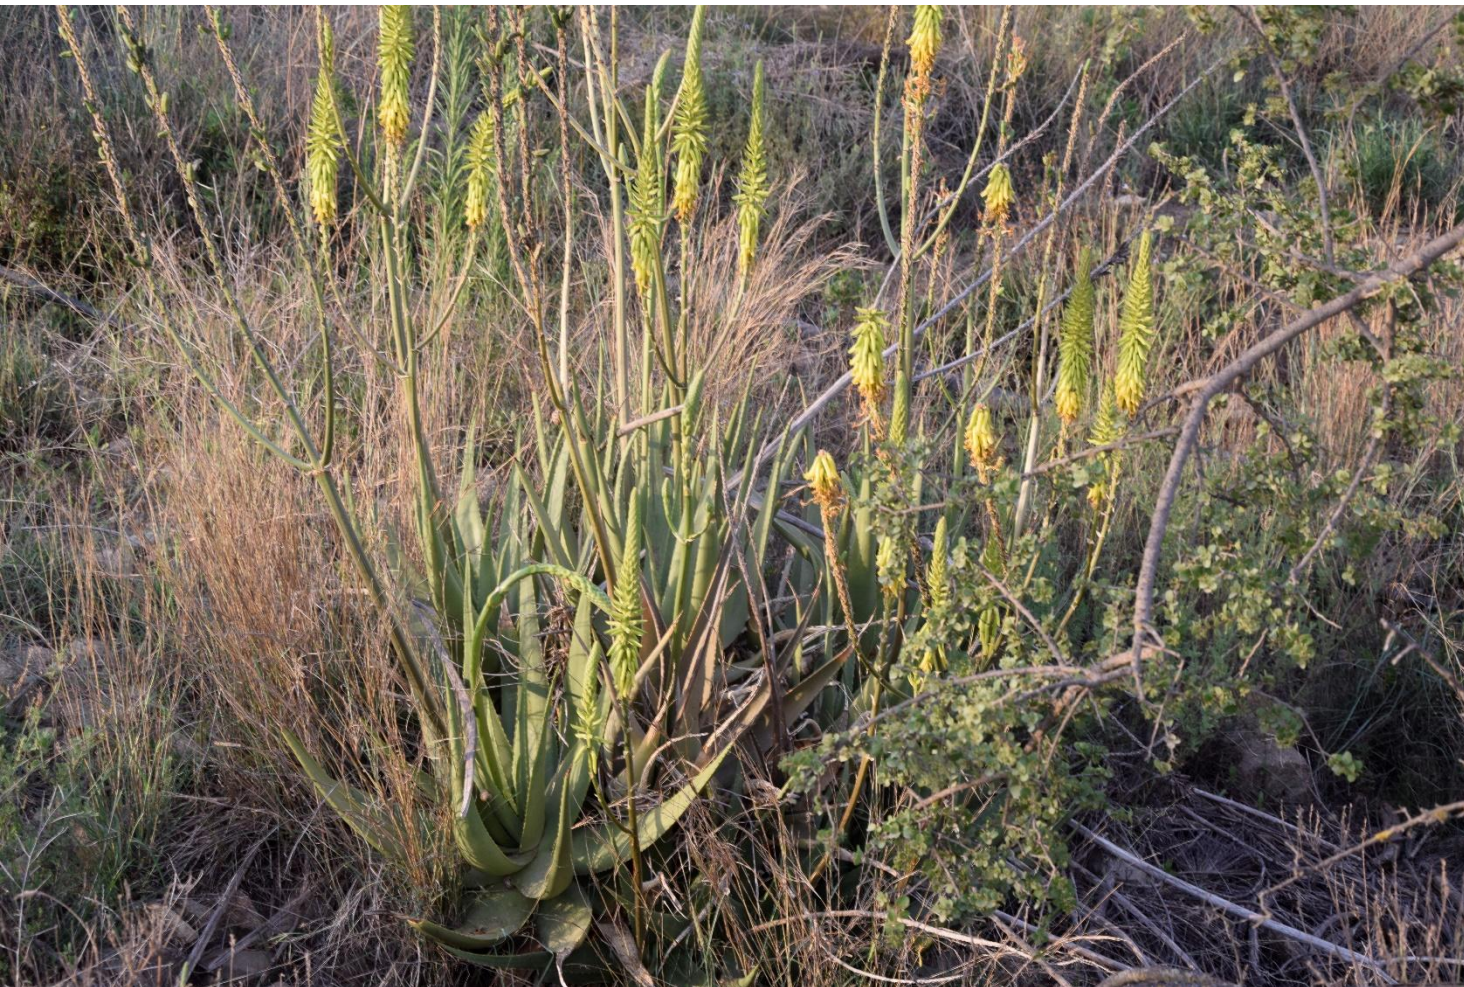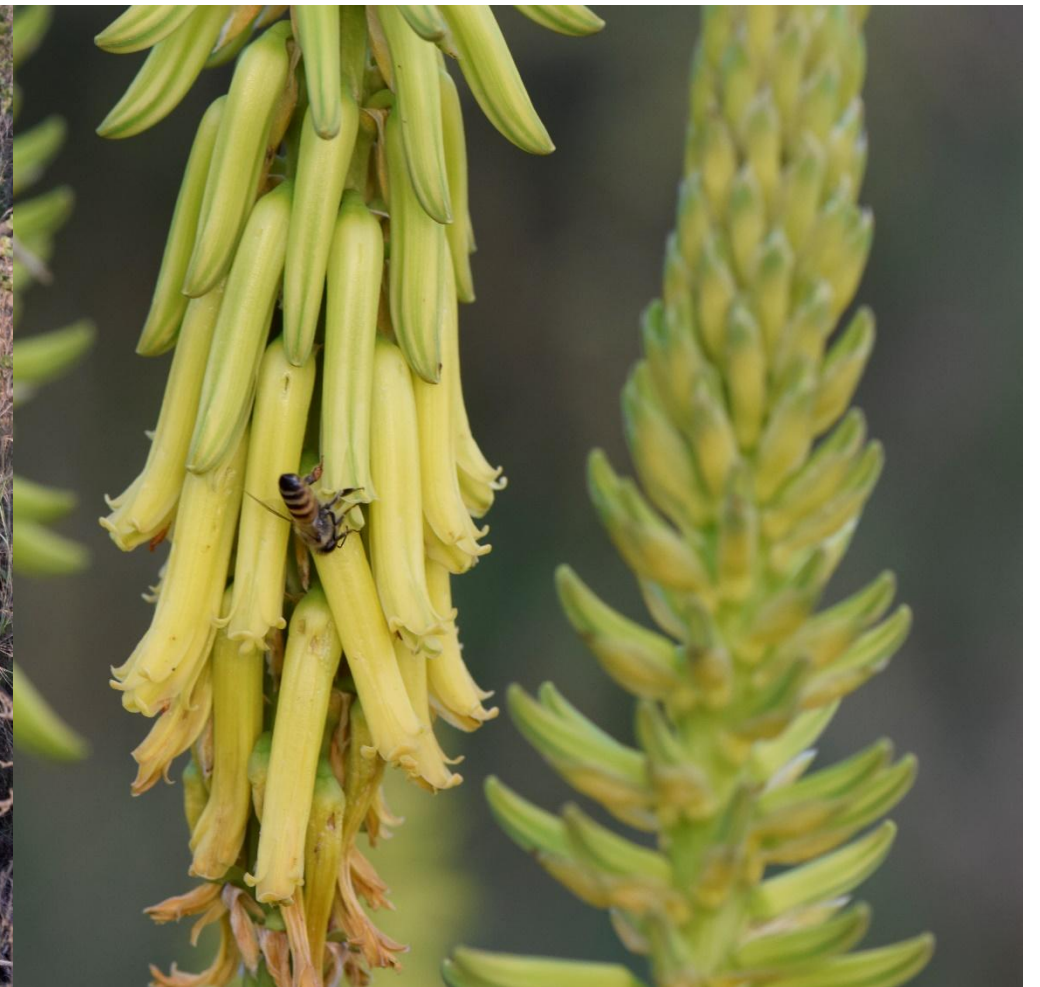



# ***Ammi majus***

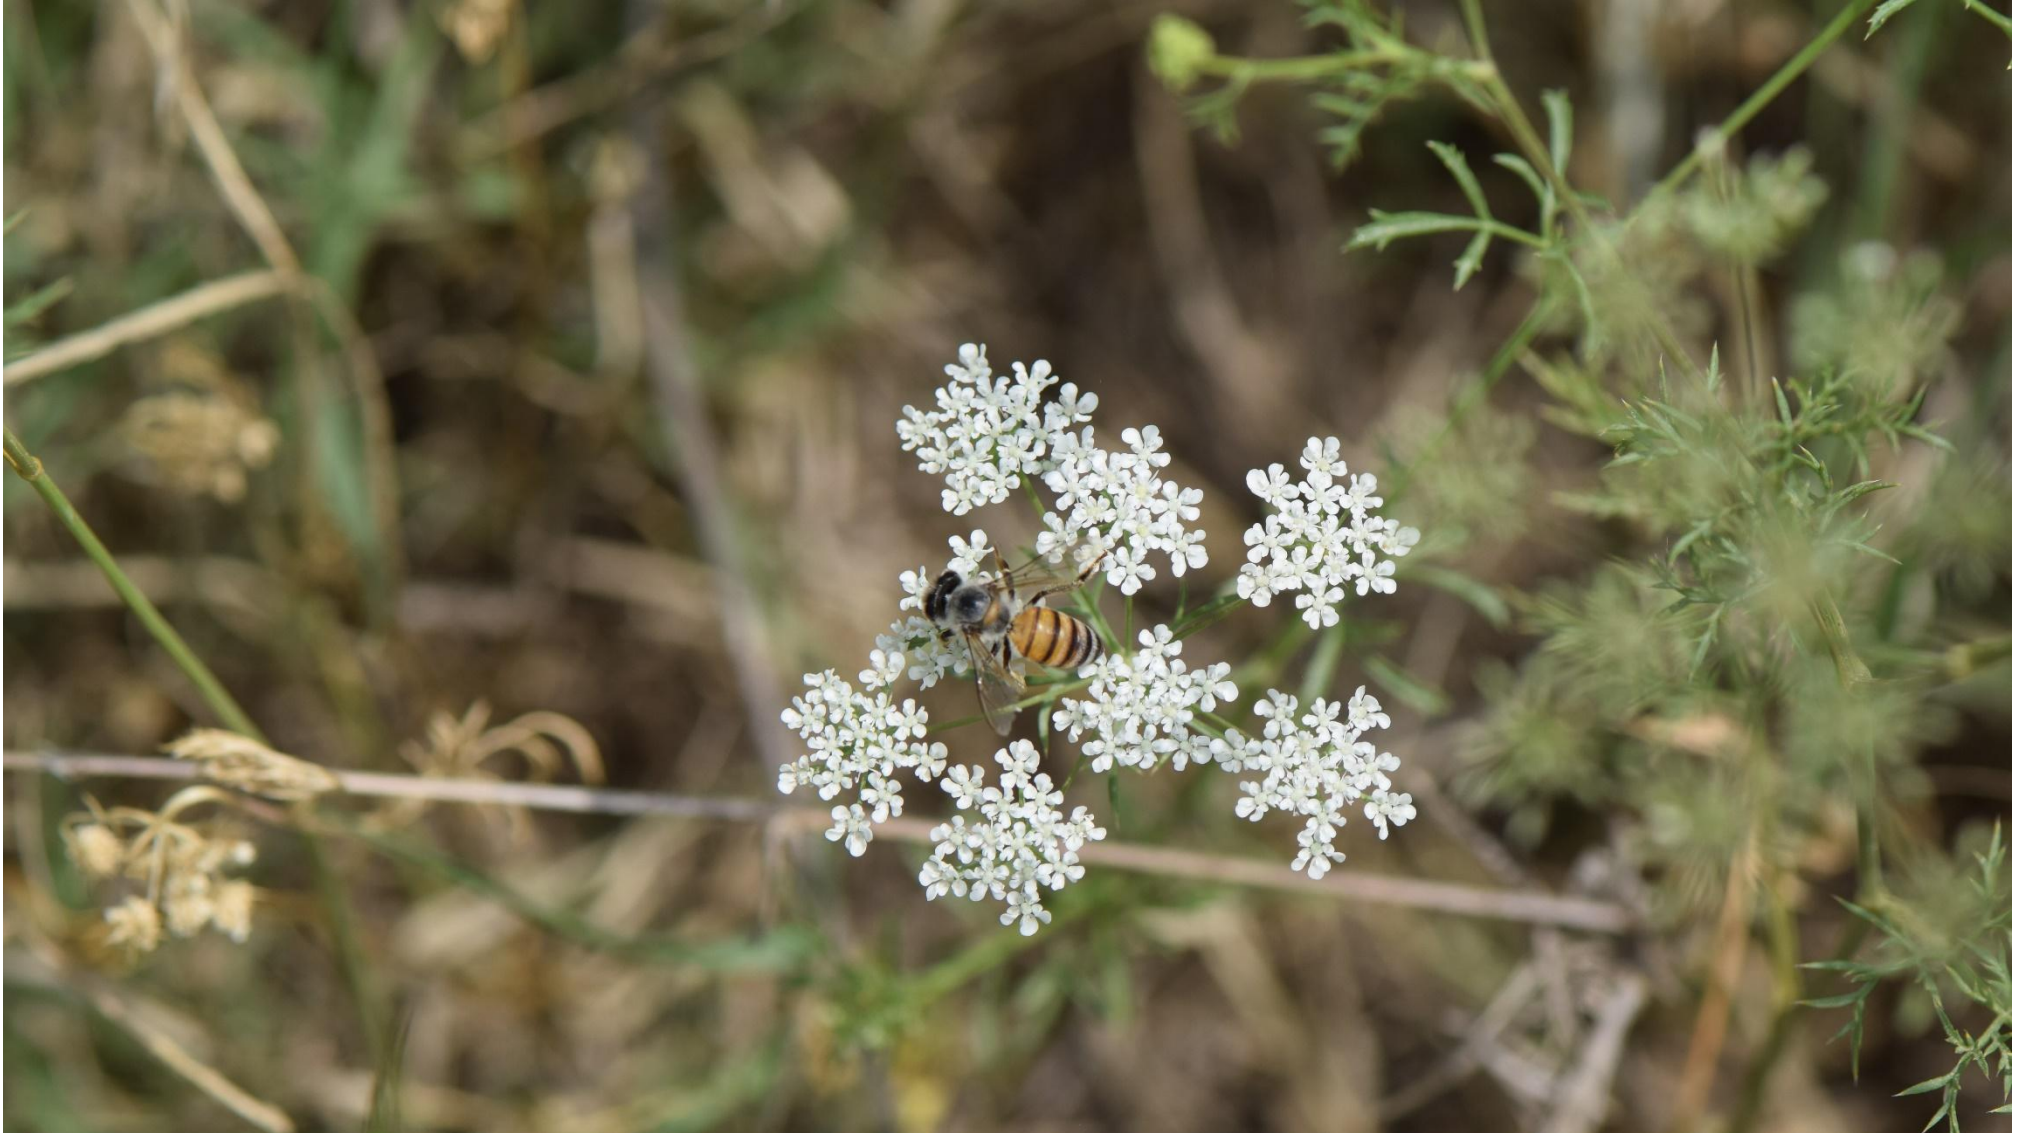



# ***Anarrhinum forsskalii***

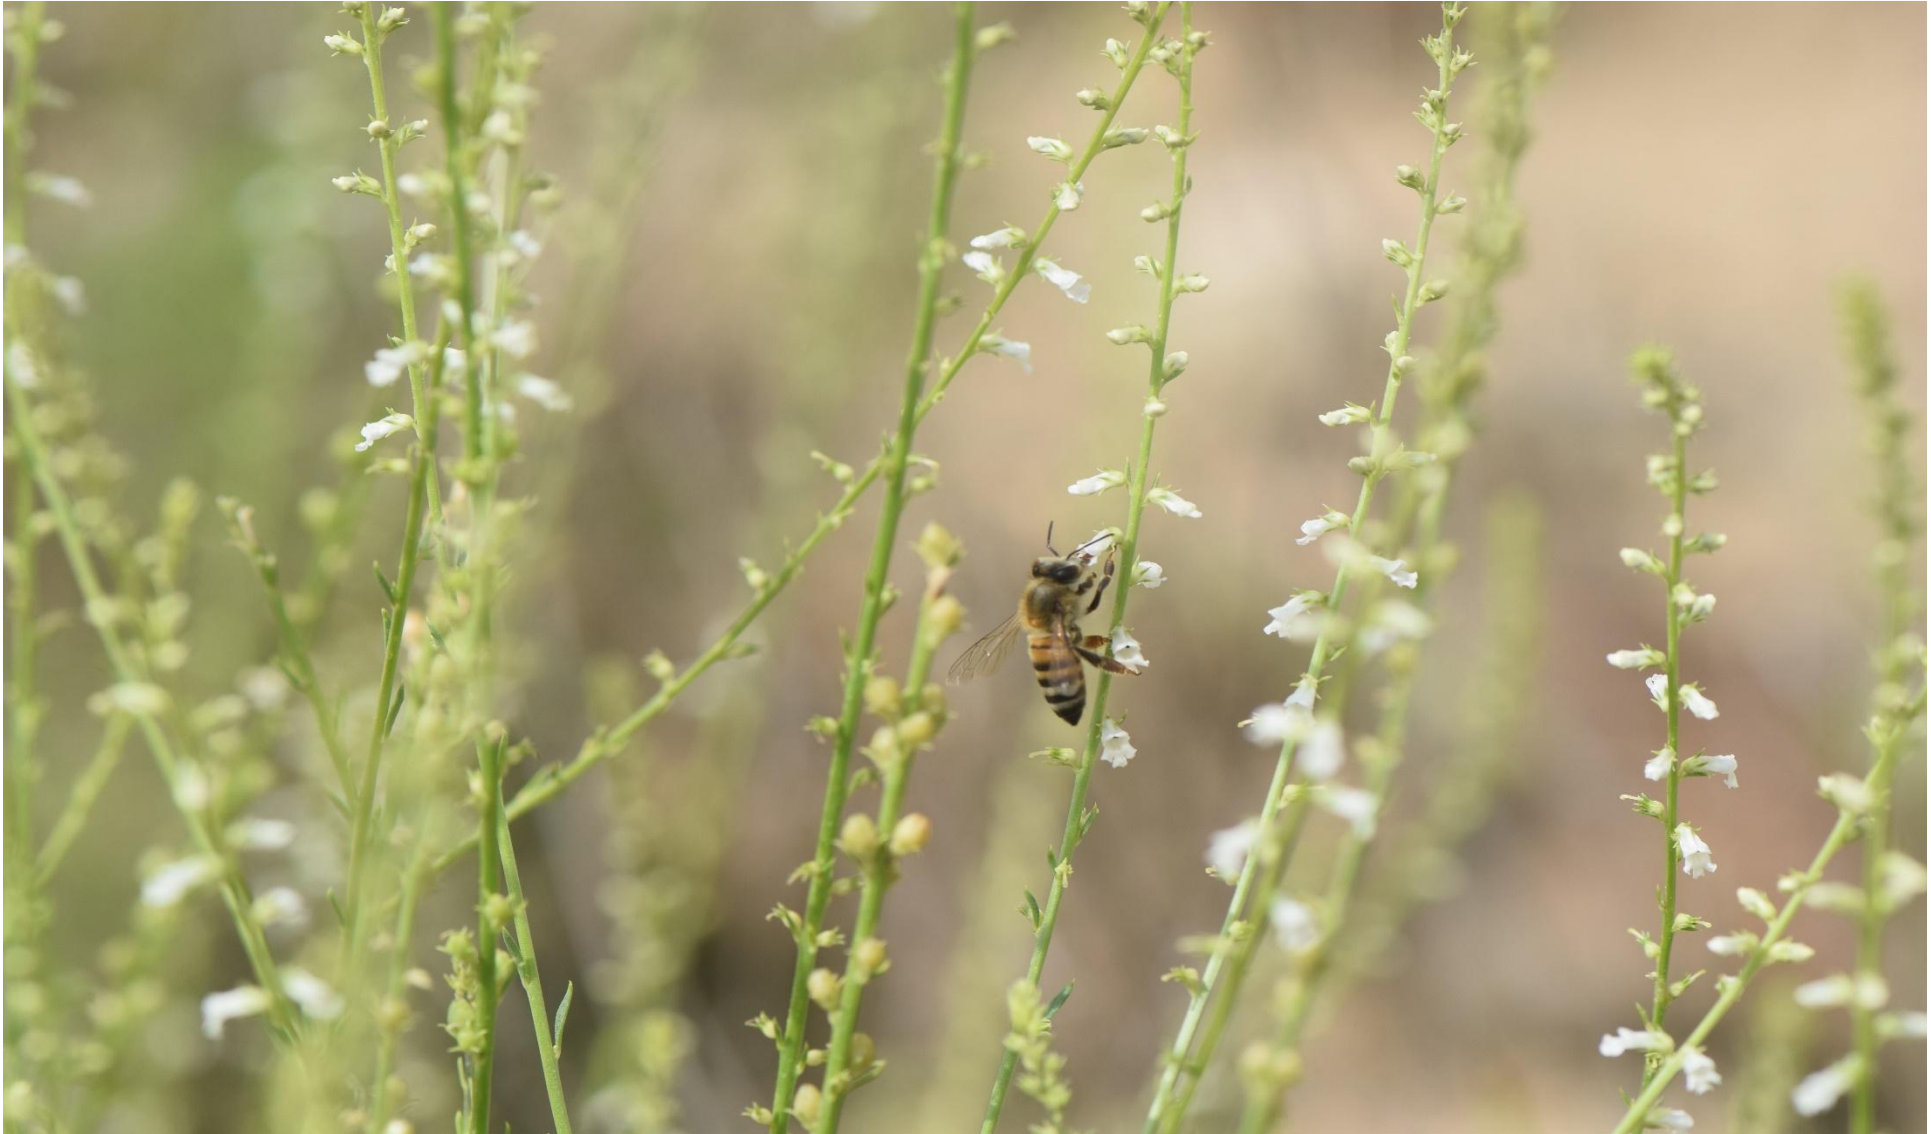



# ***Argemone ochroleuca***

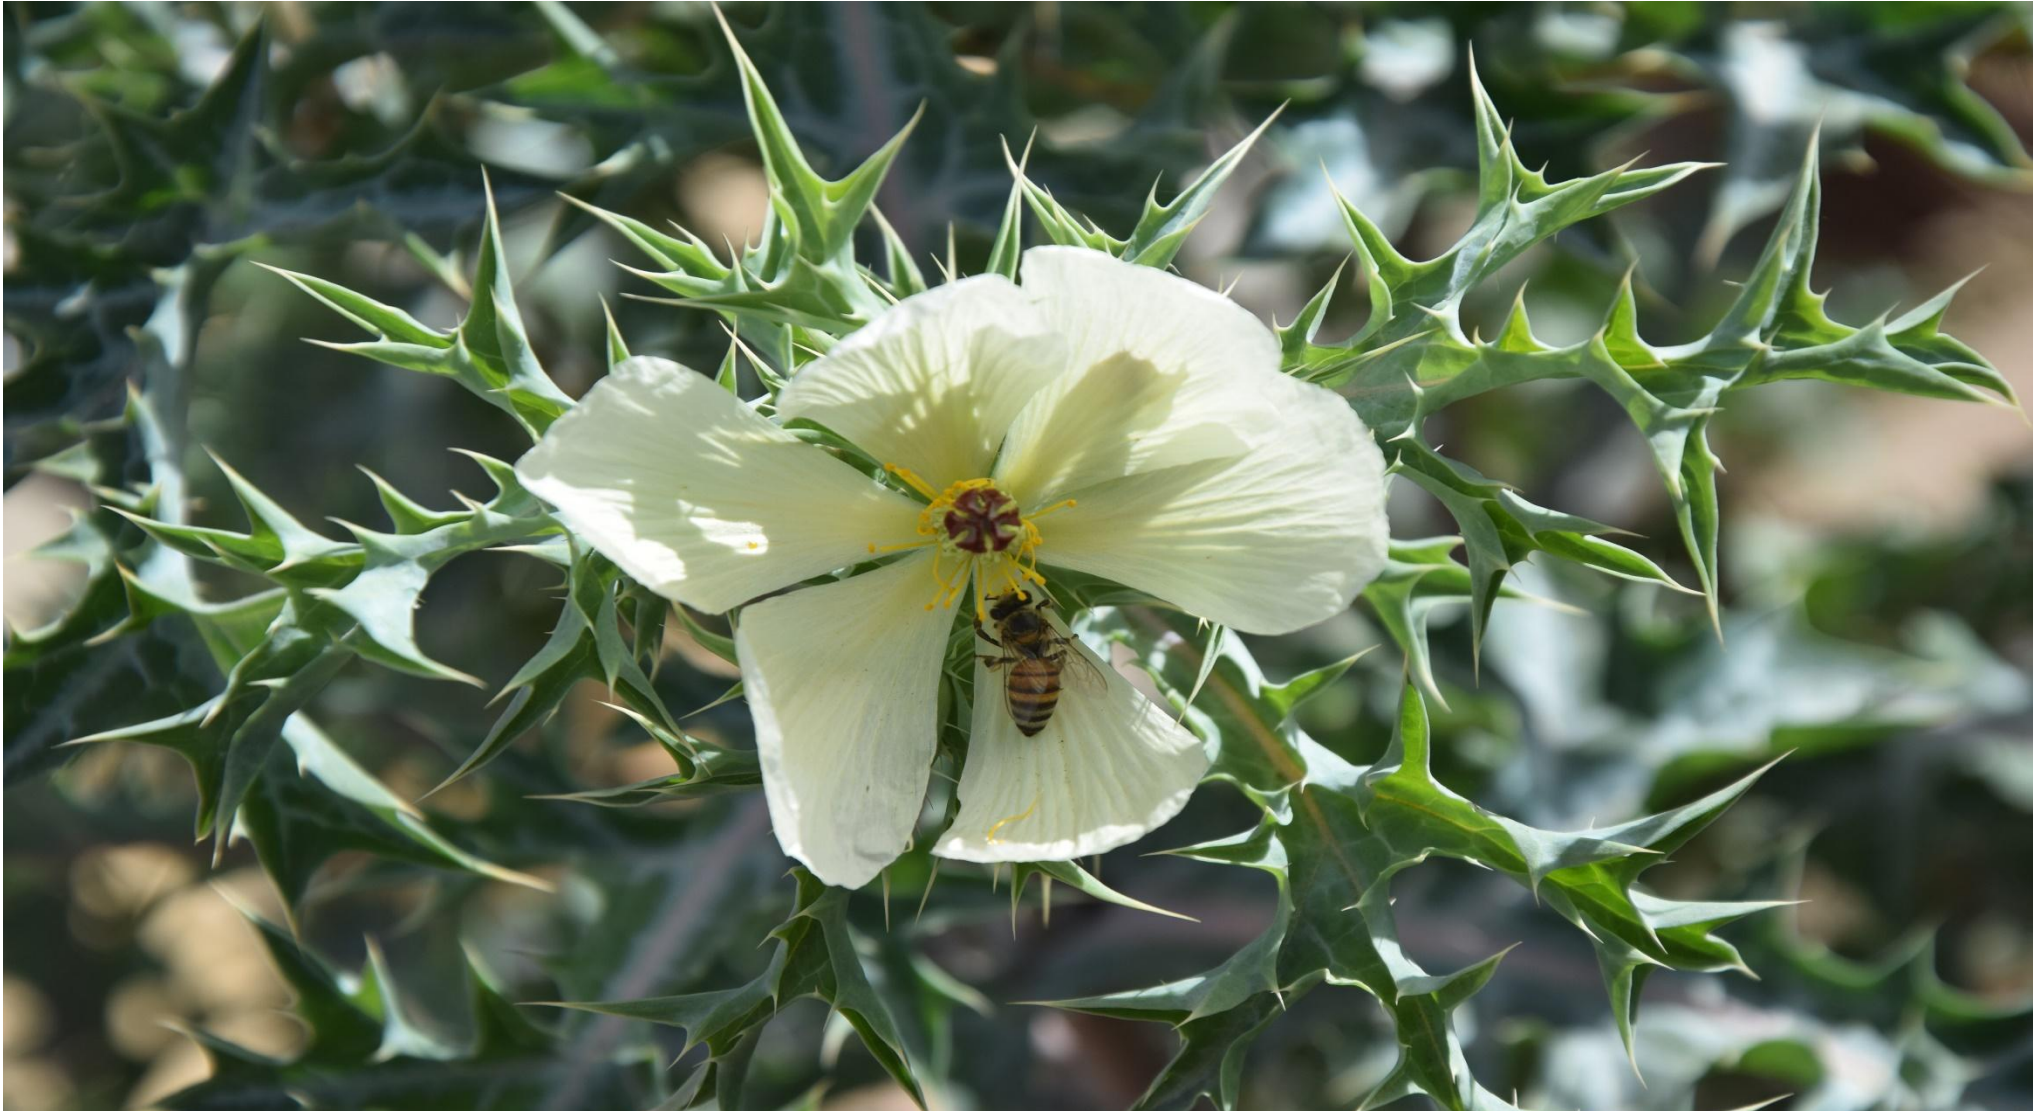



# *Asphodelus tenuifolius*

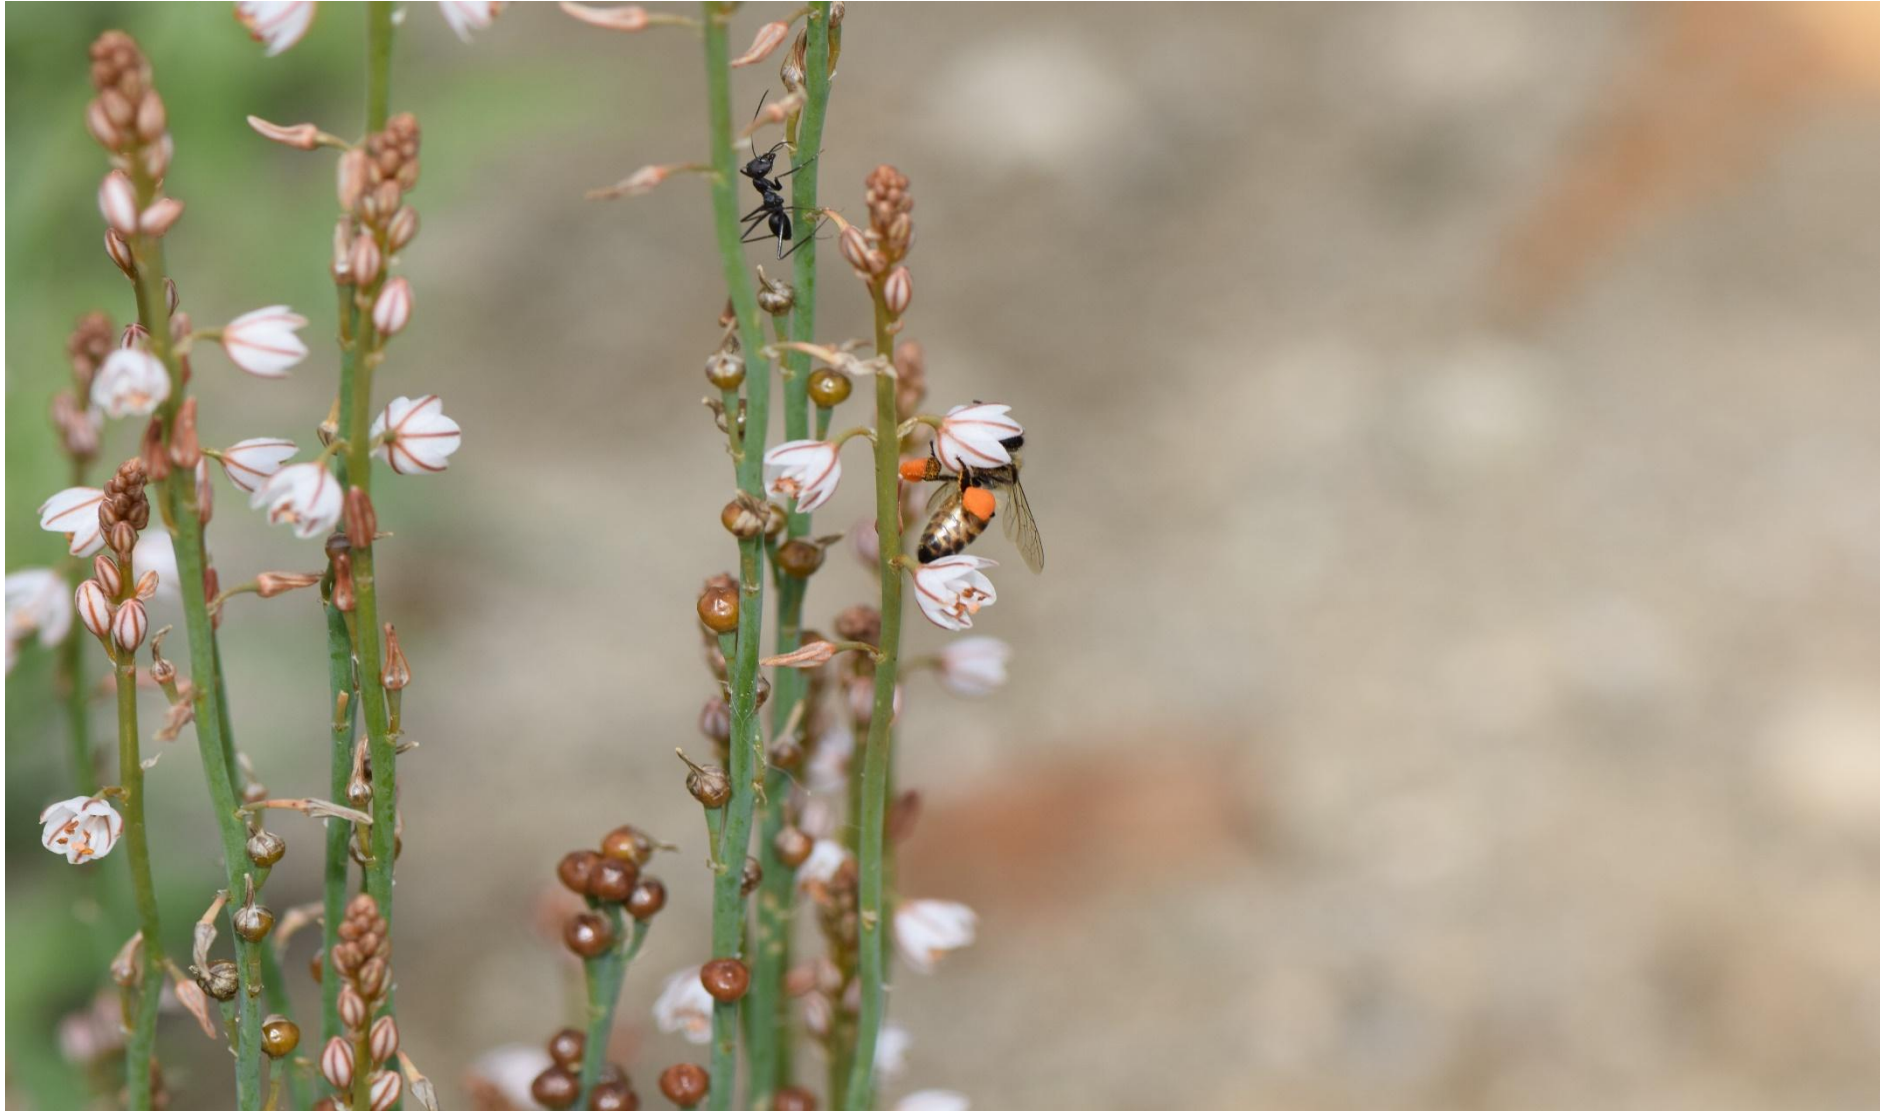



# ***Astragalus abyssinicus***

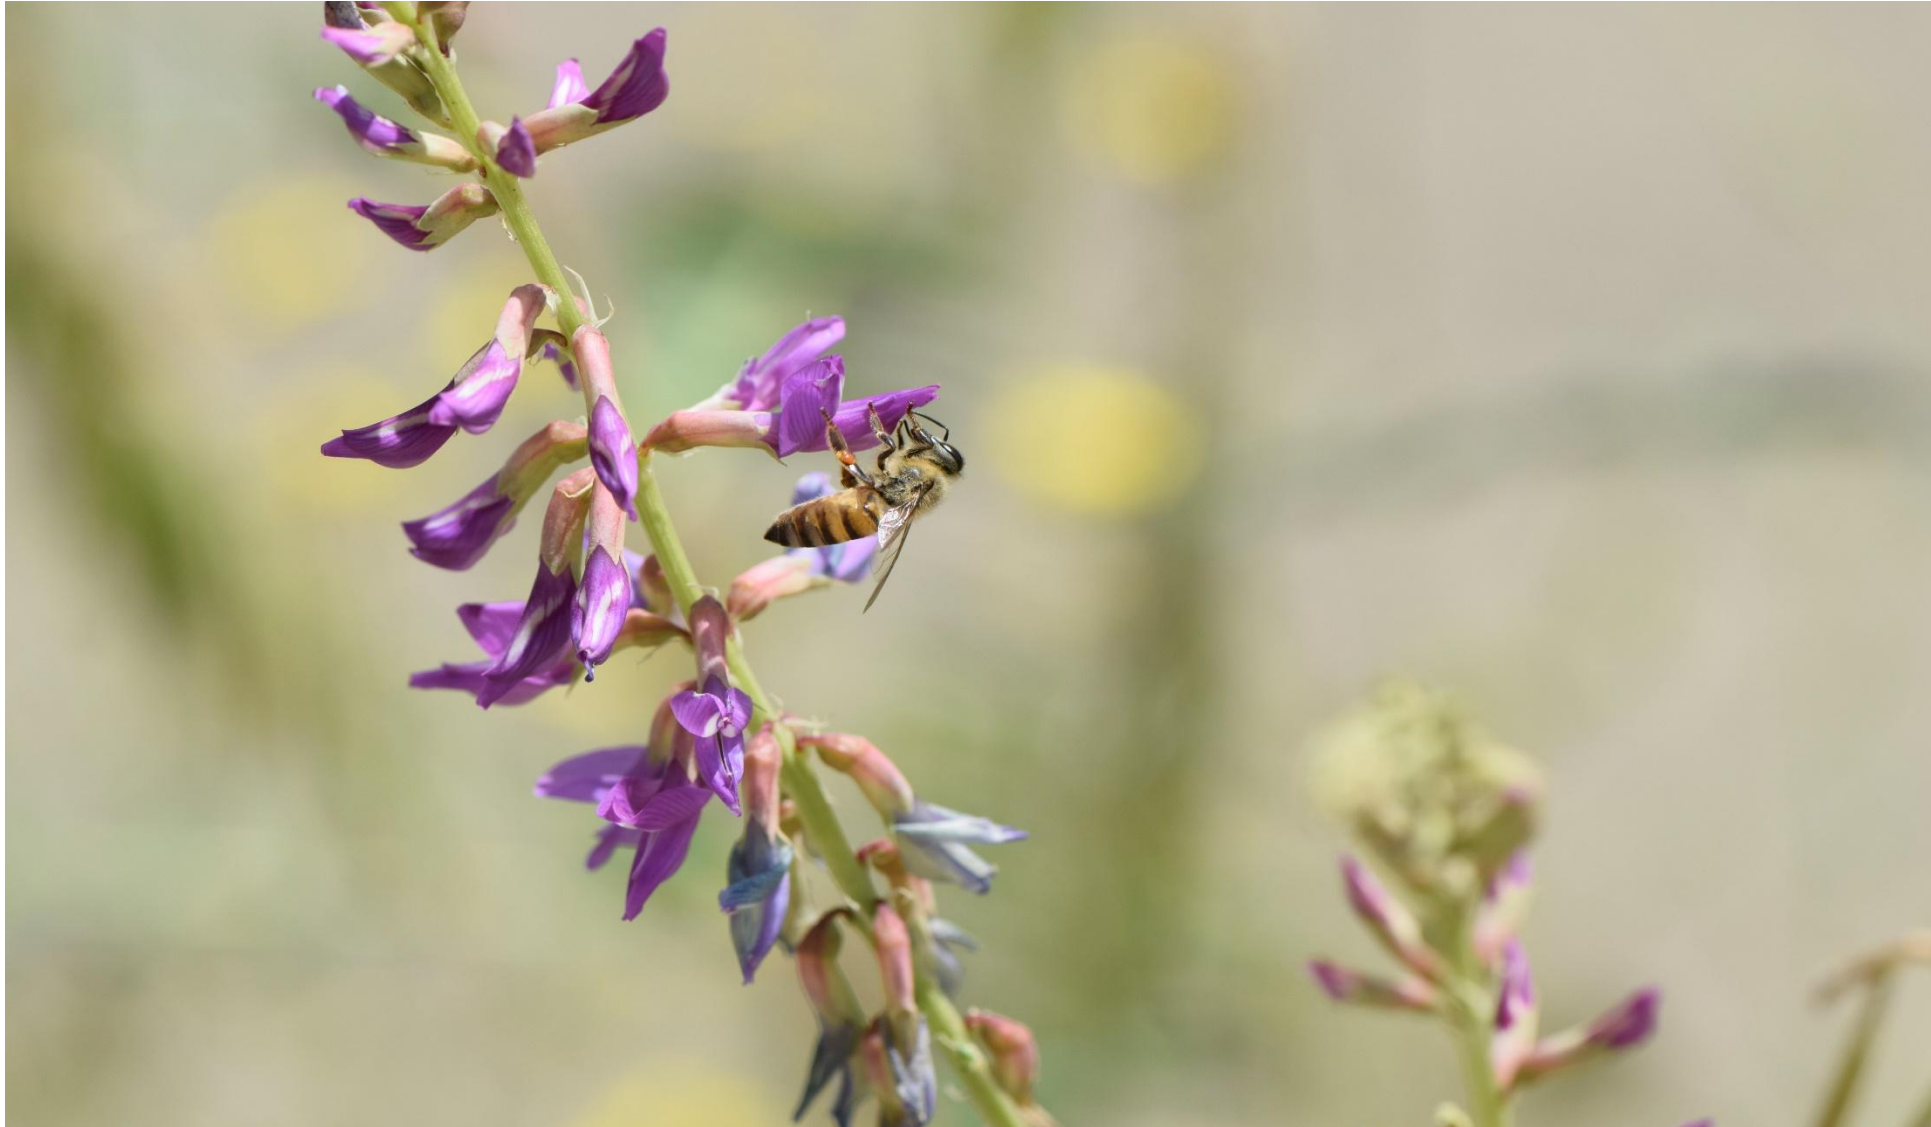



# ***Baccharoides schimperi***

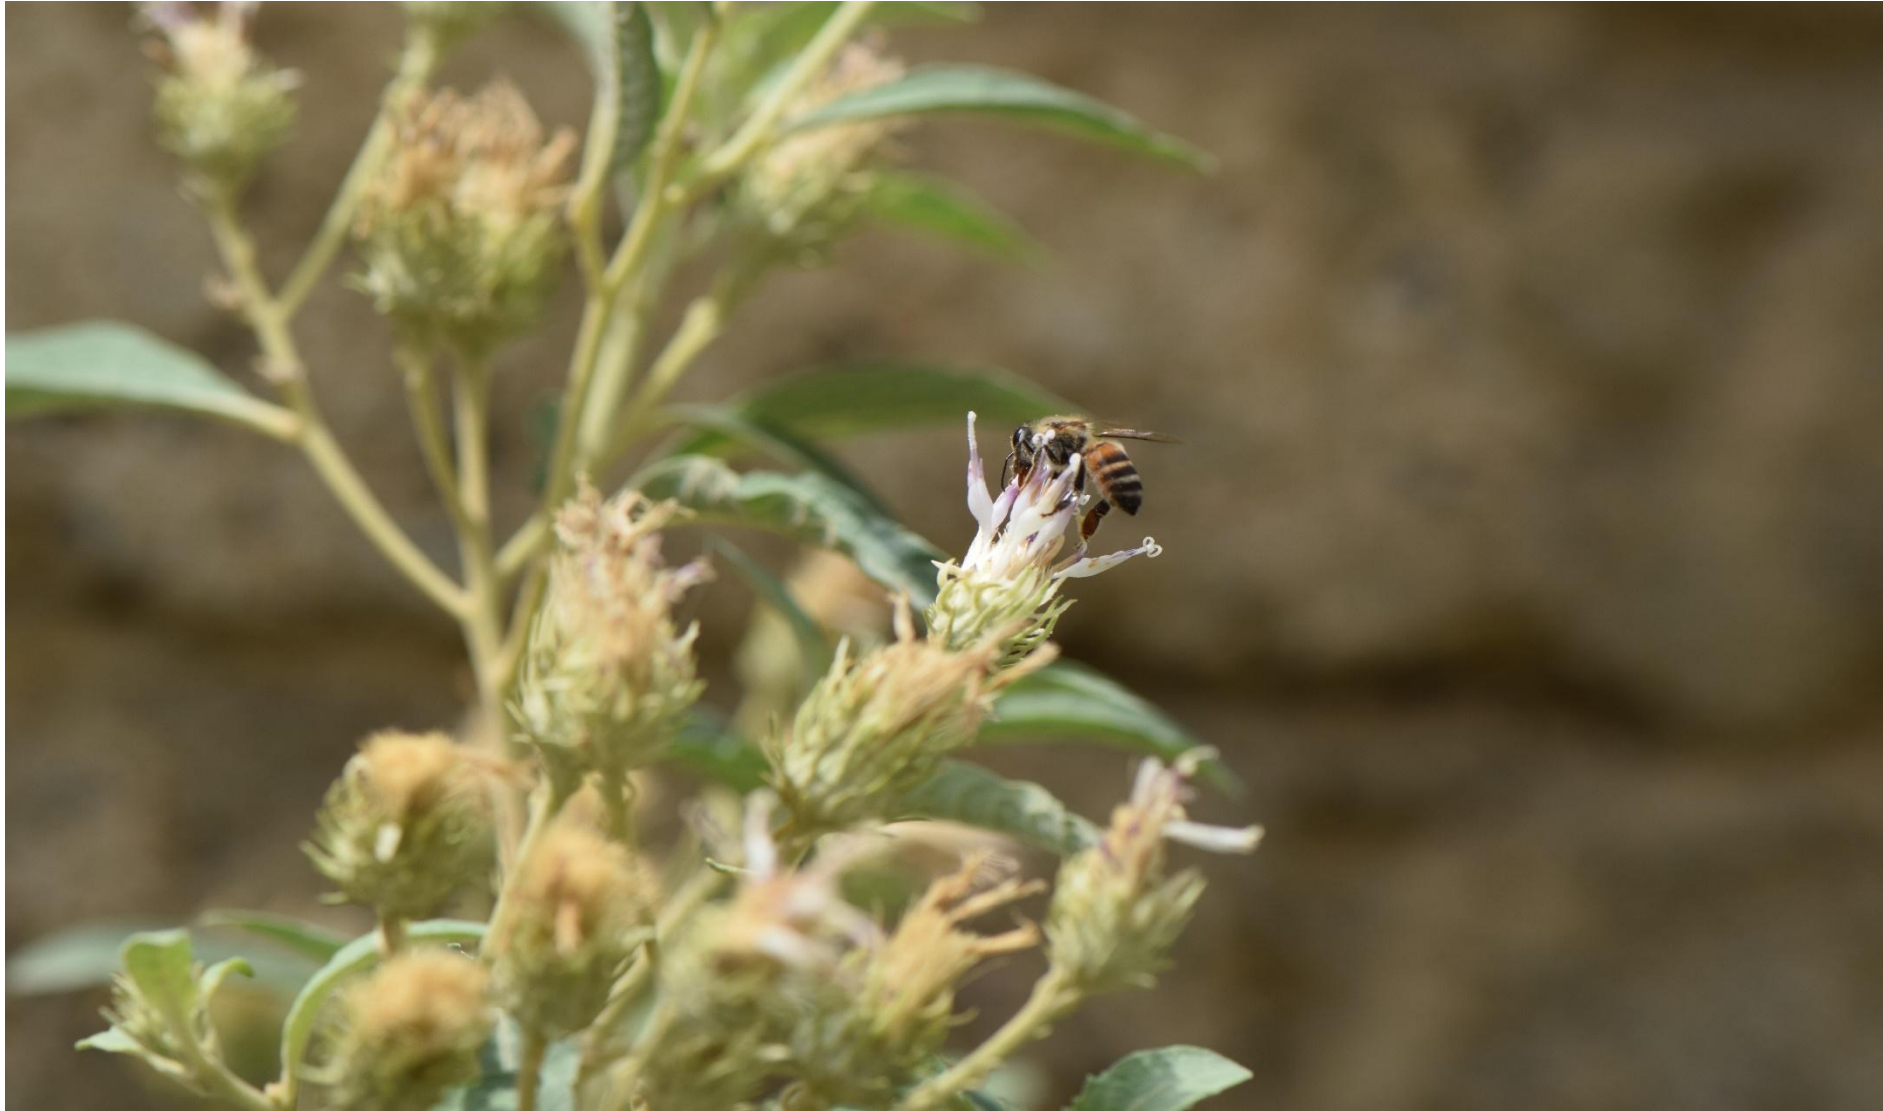



# ***Bacopa monnieri***

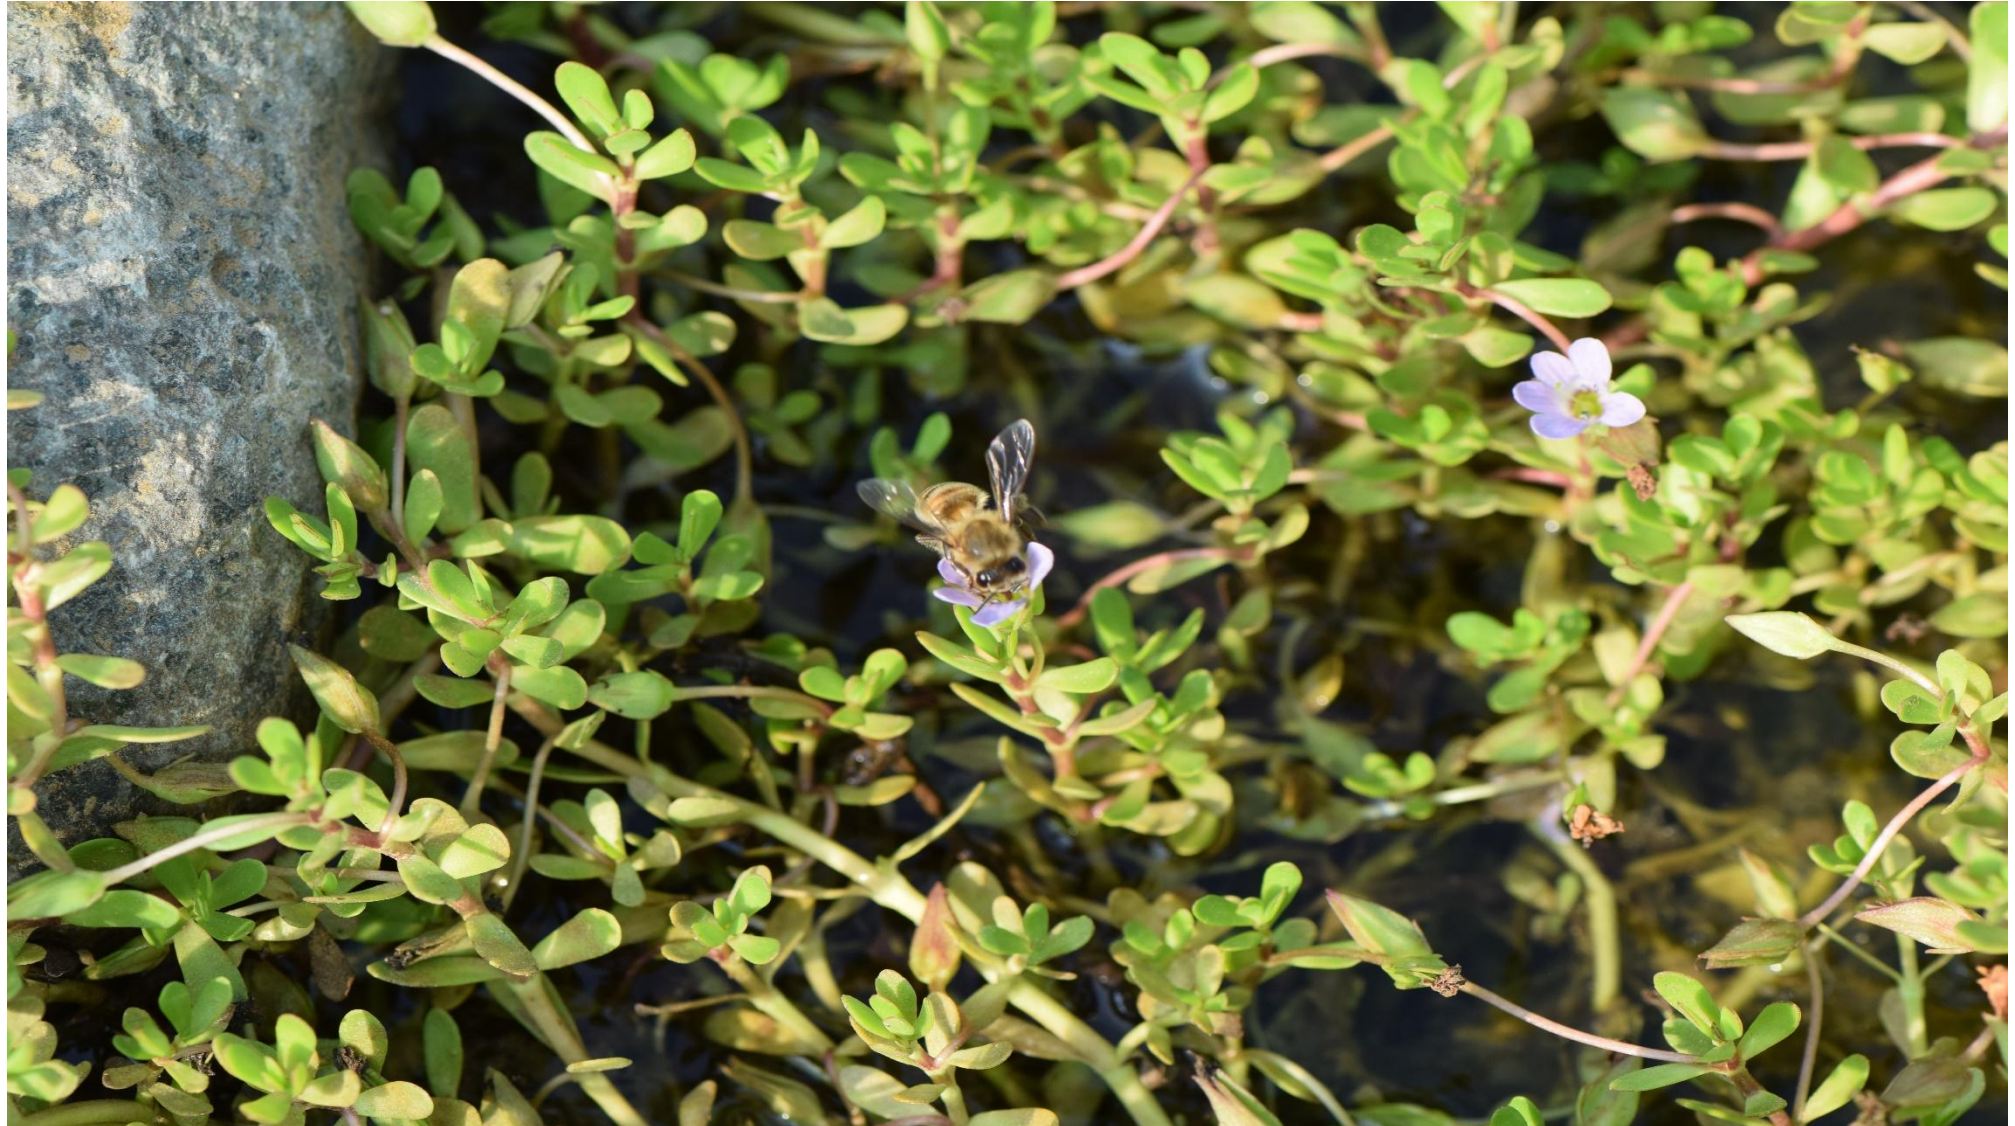



# ***Bidens pilosa***

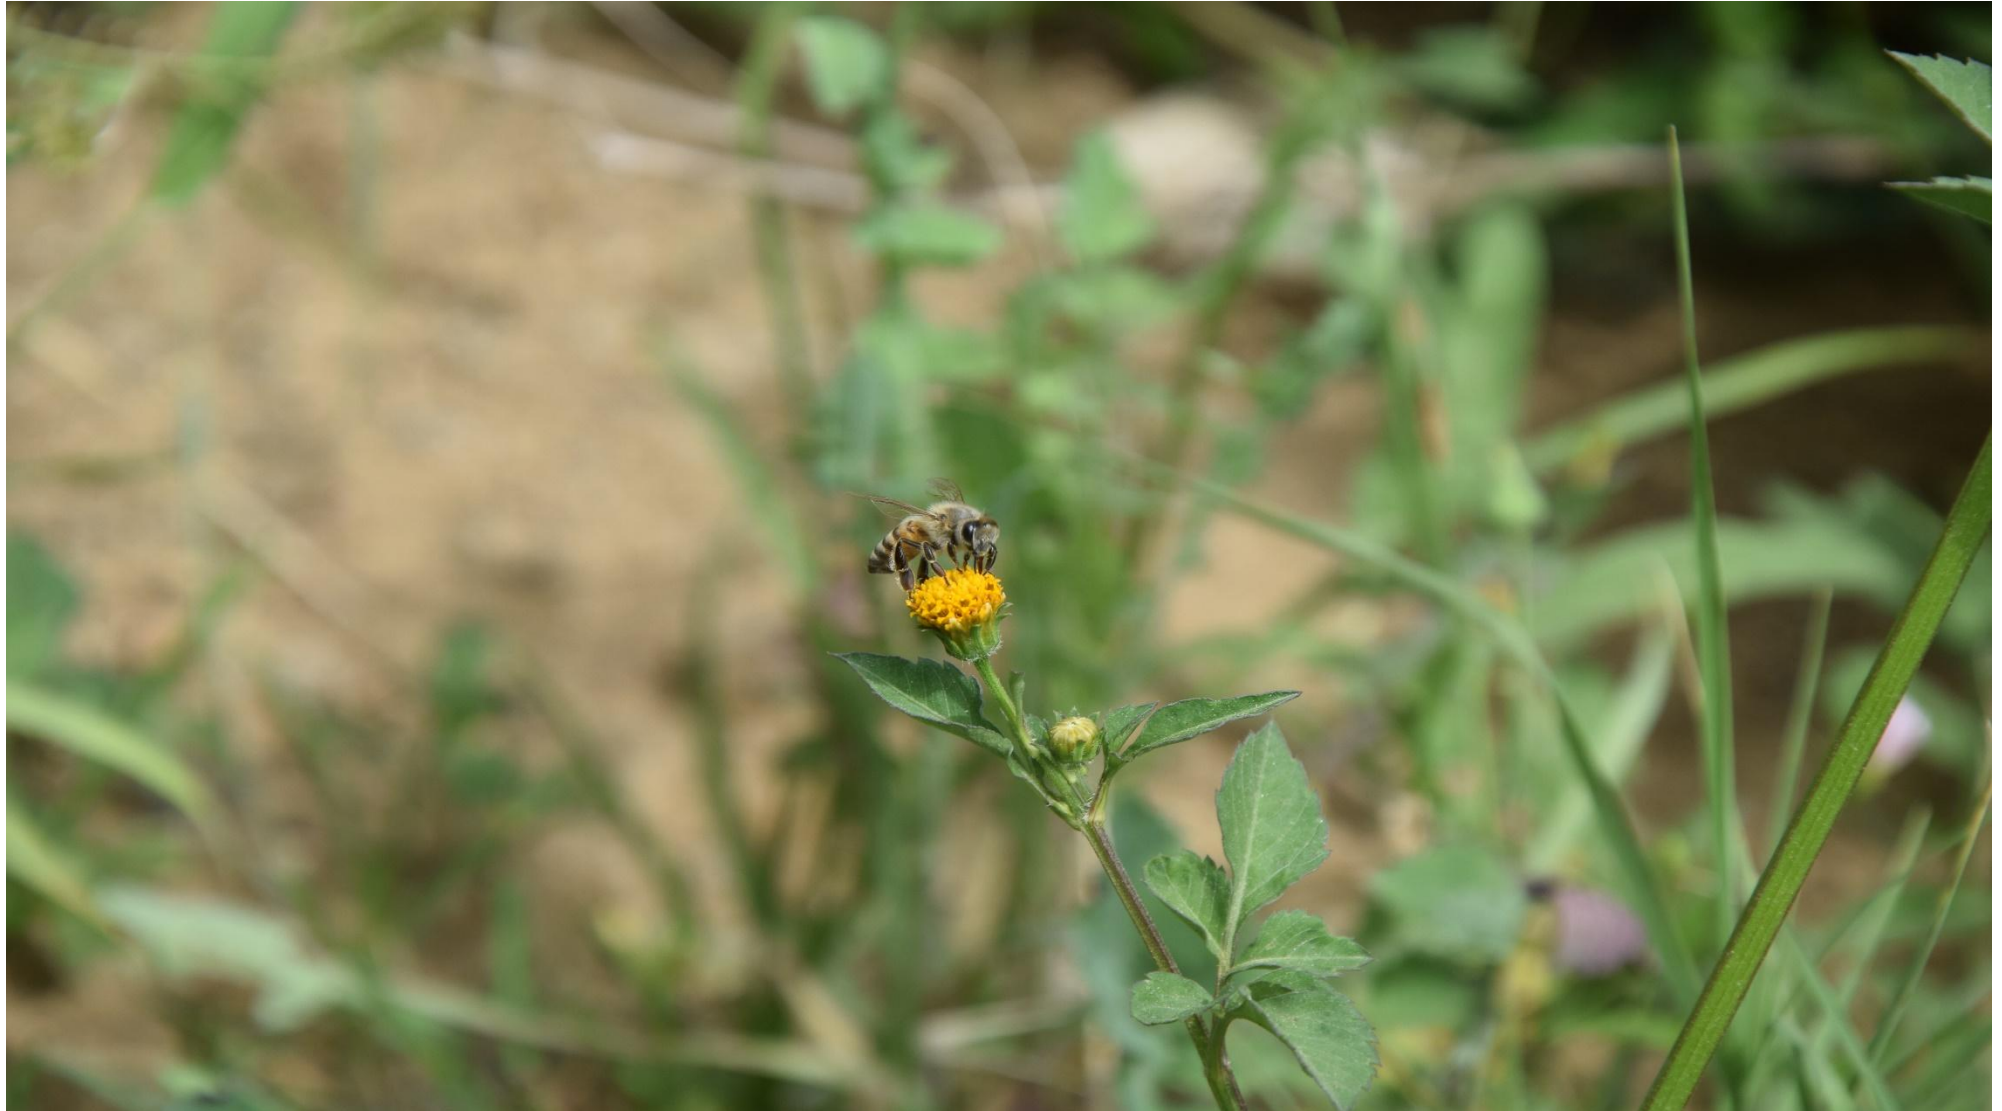



# ***Blepharis edulis***

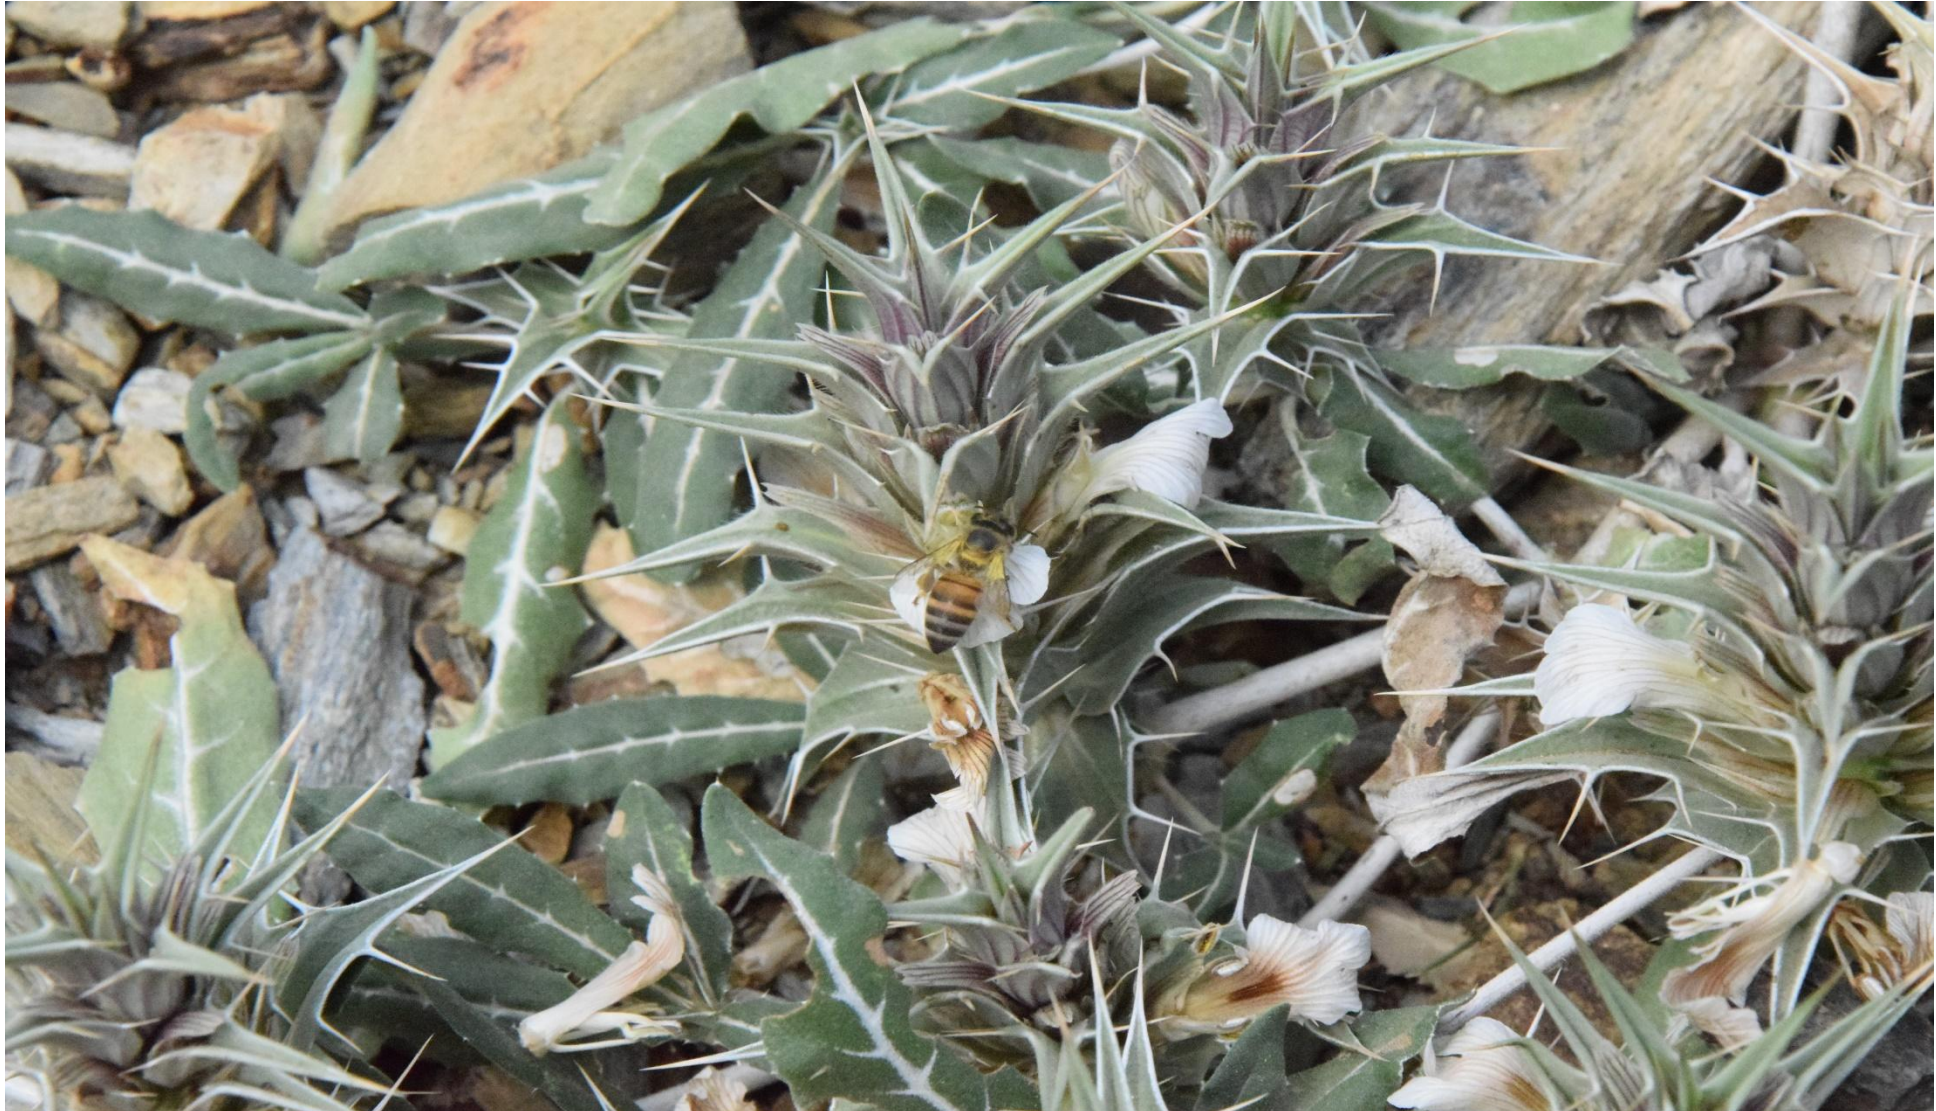



# ***Calatropis procera***

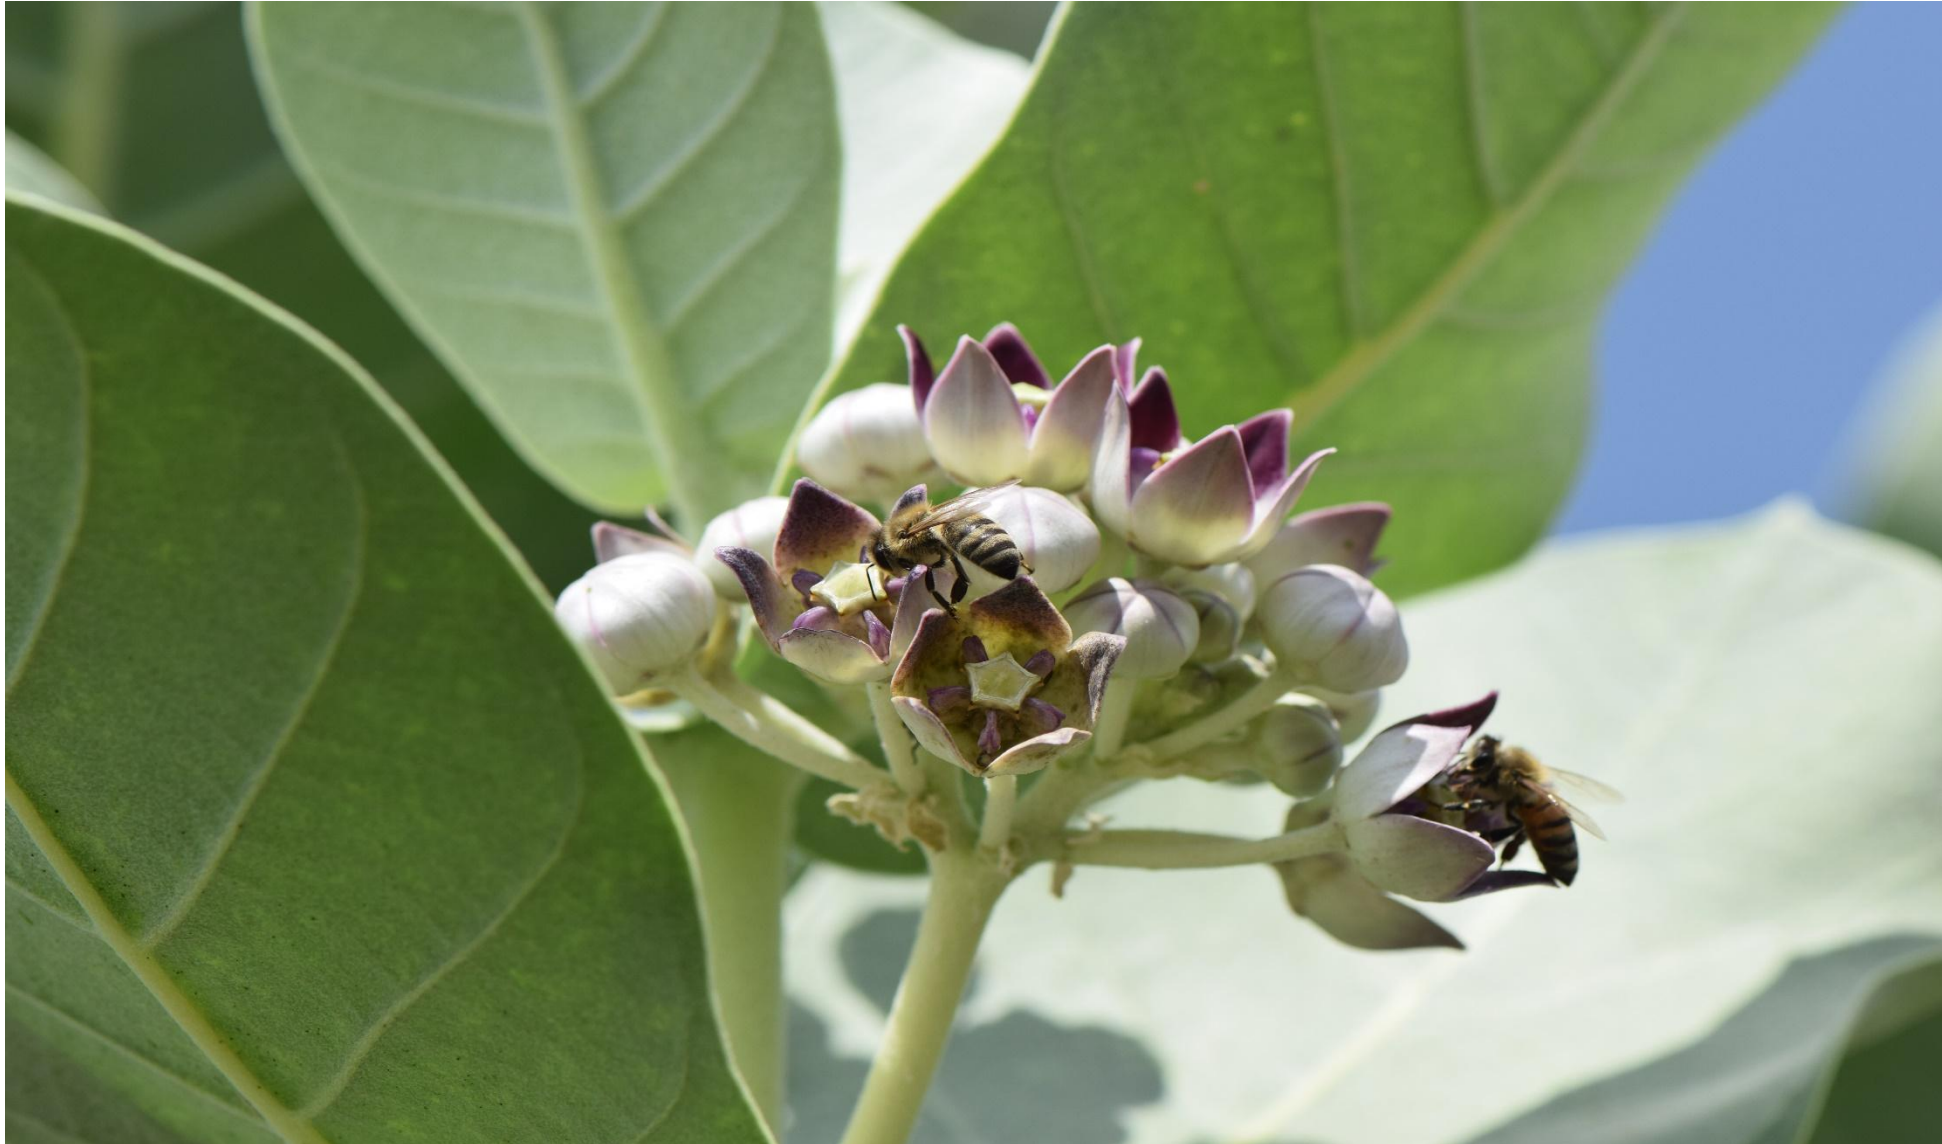

# *Capparis cartilaginea*

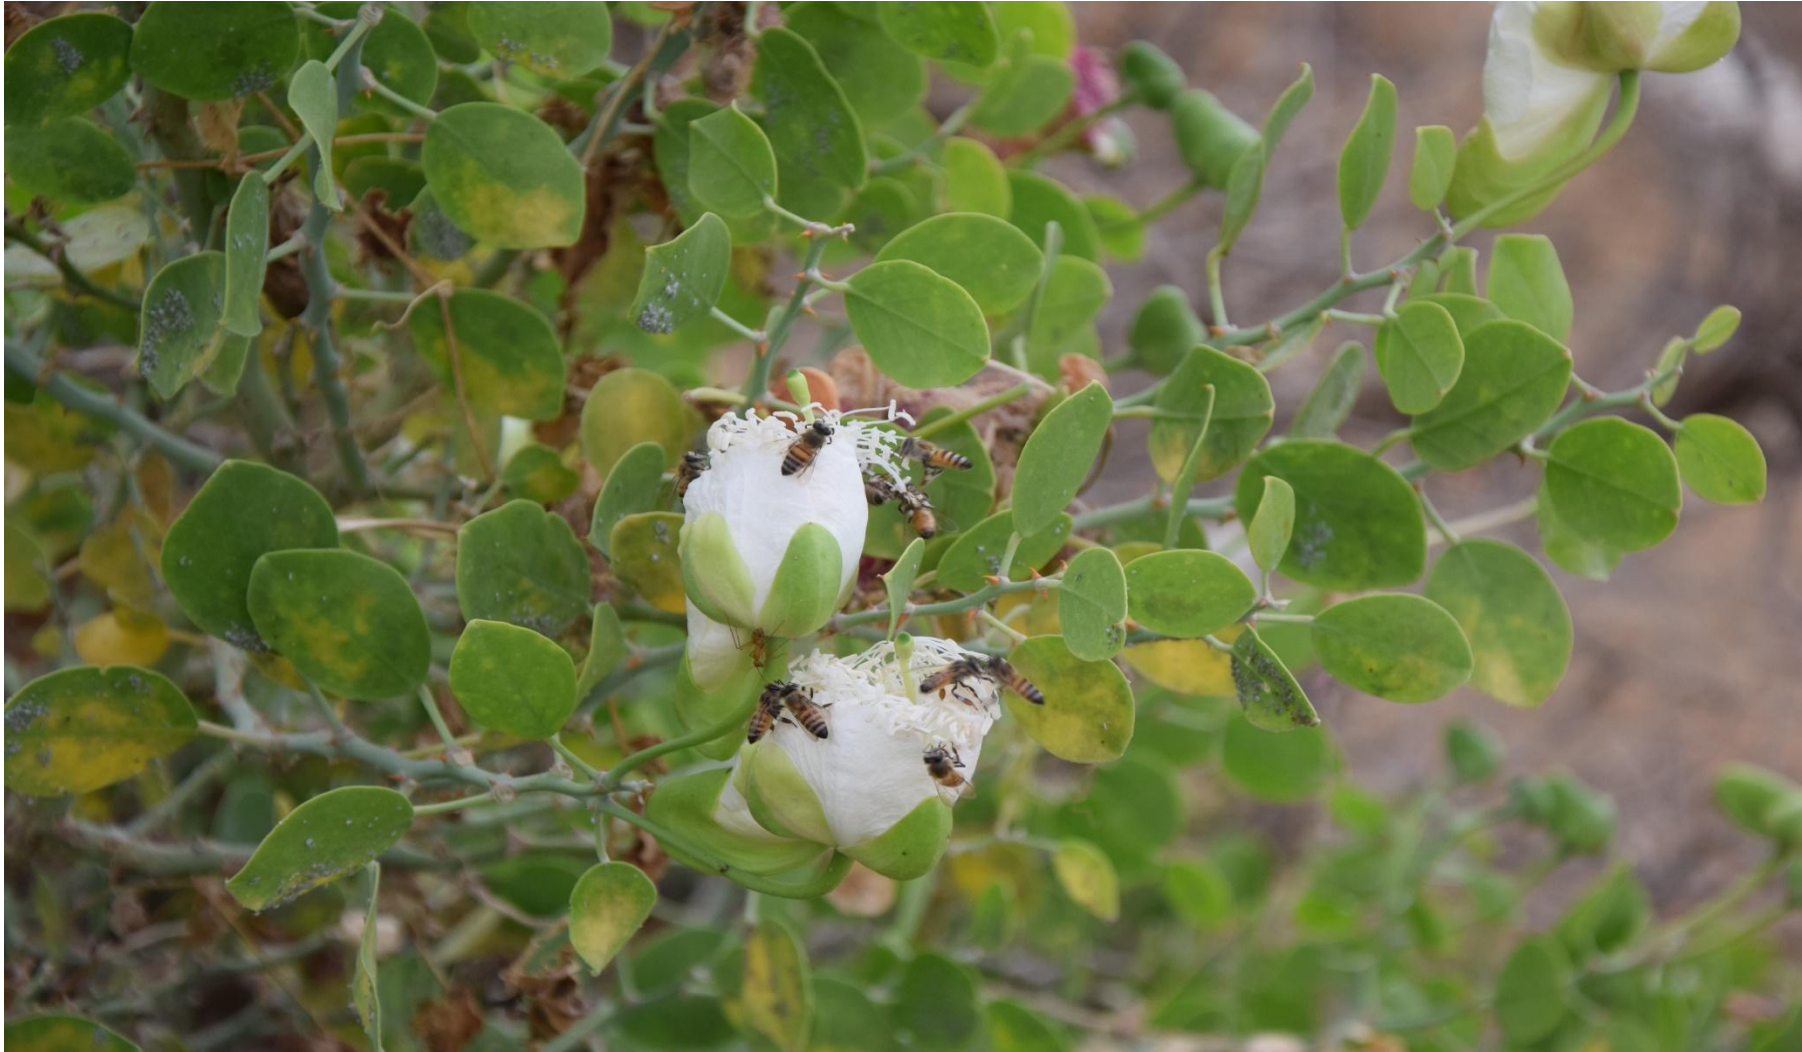



# *Caylosia hexigina*

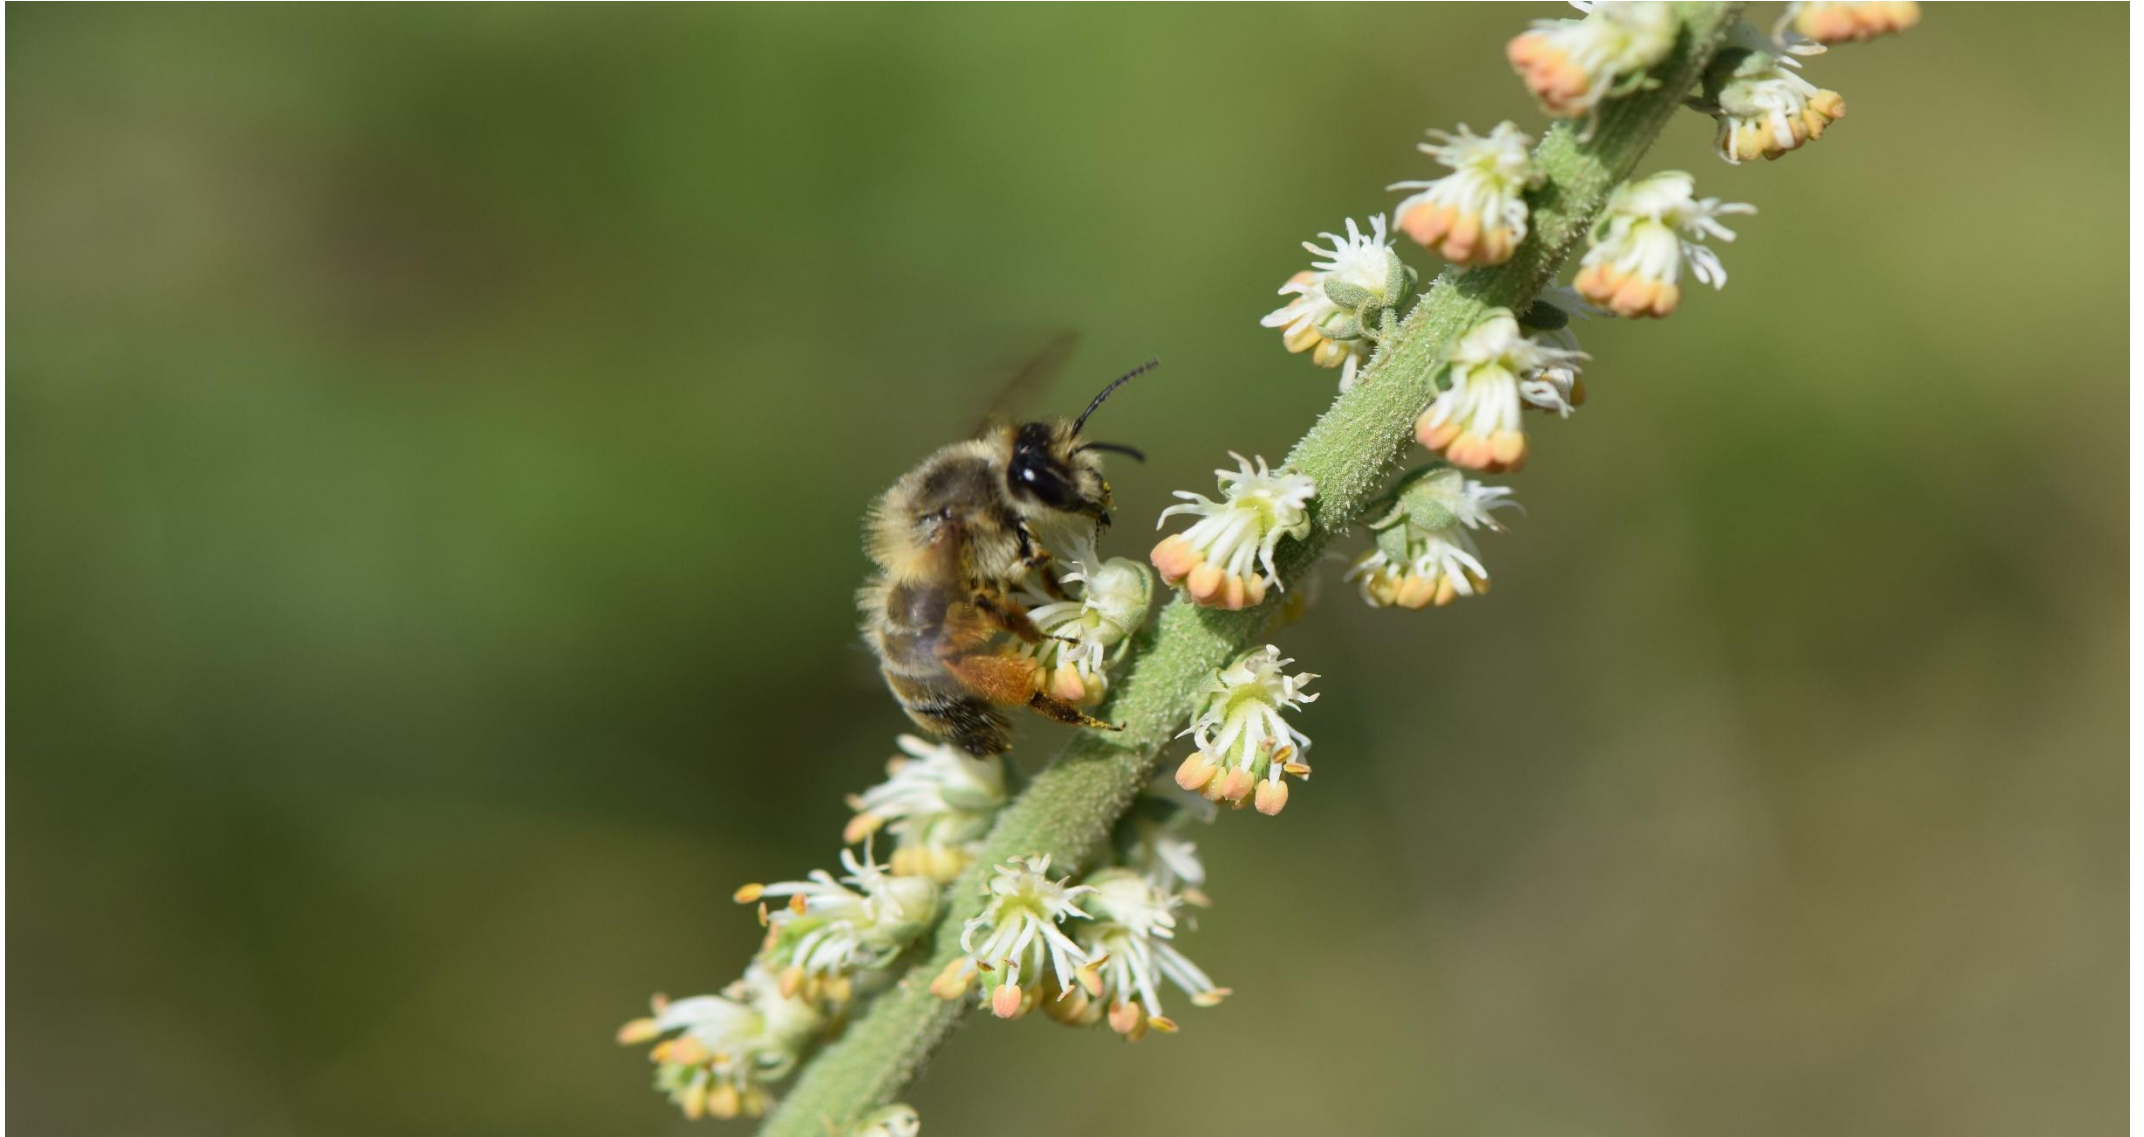

# *Cenchrus ciliaris*

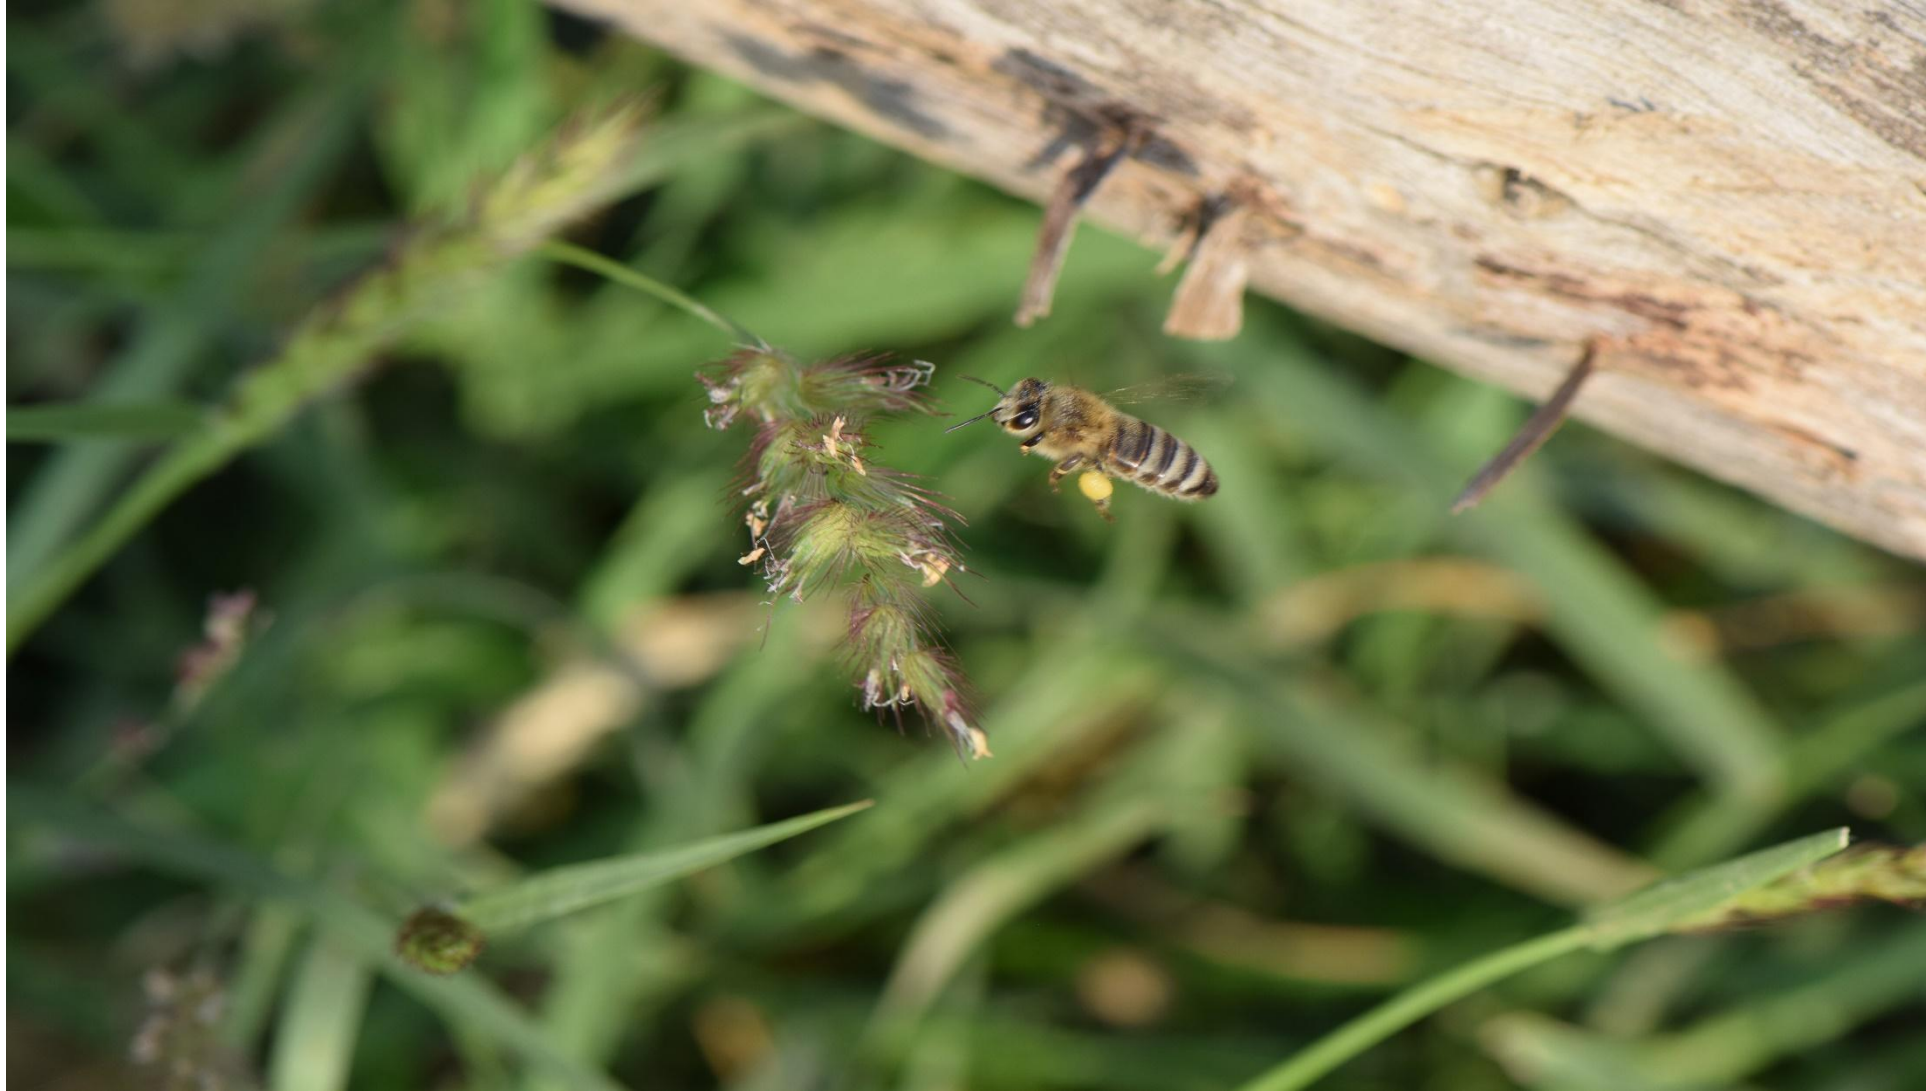



# *Centuarea sinaica*

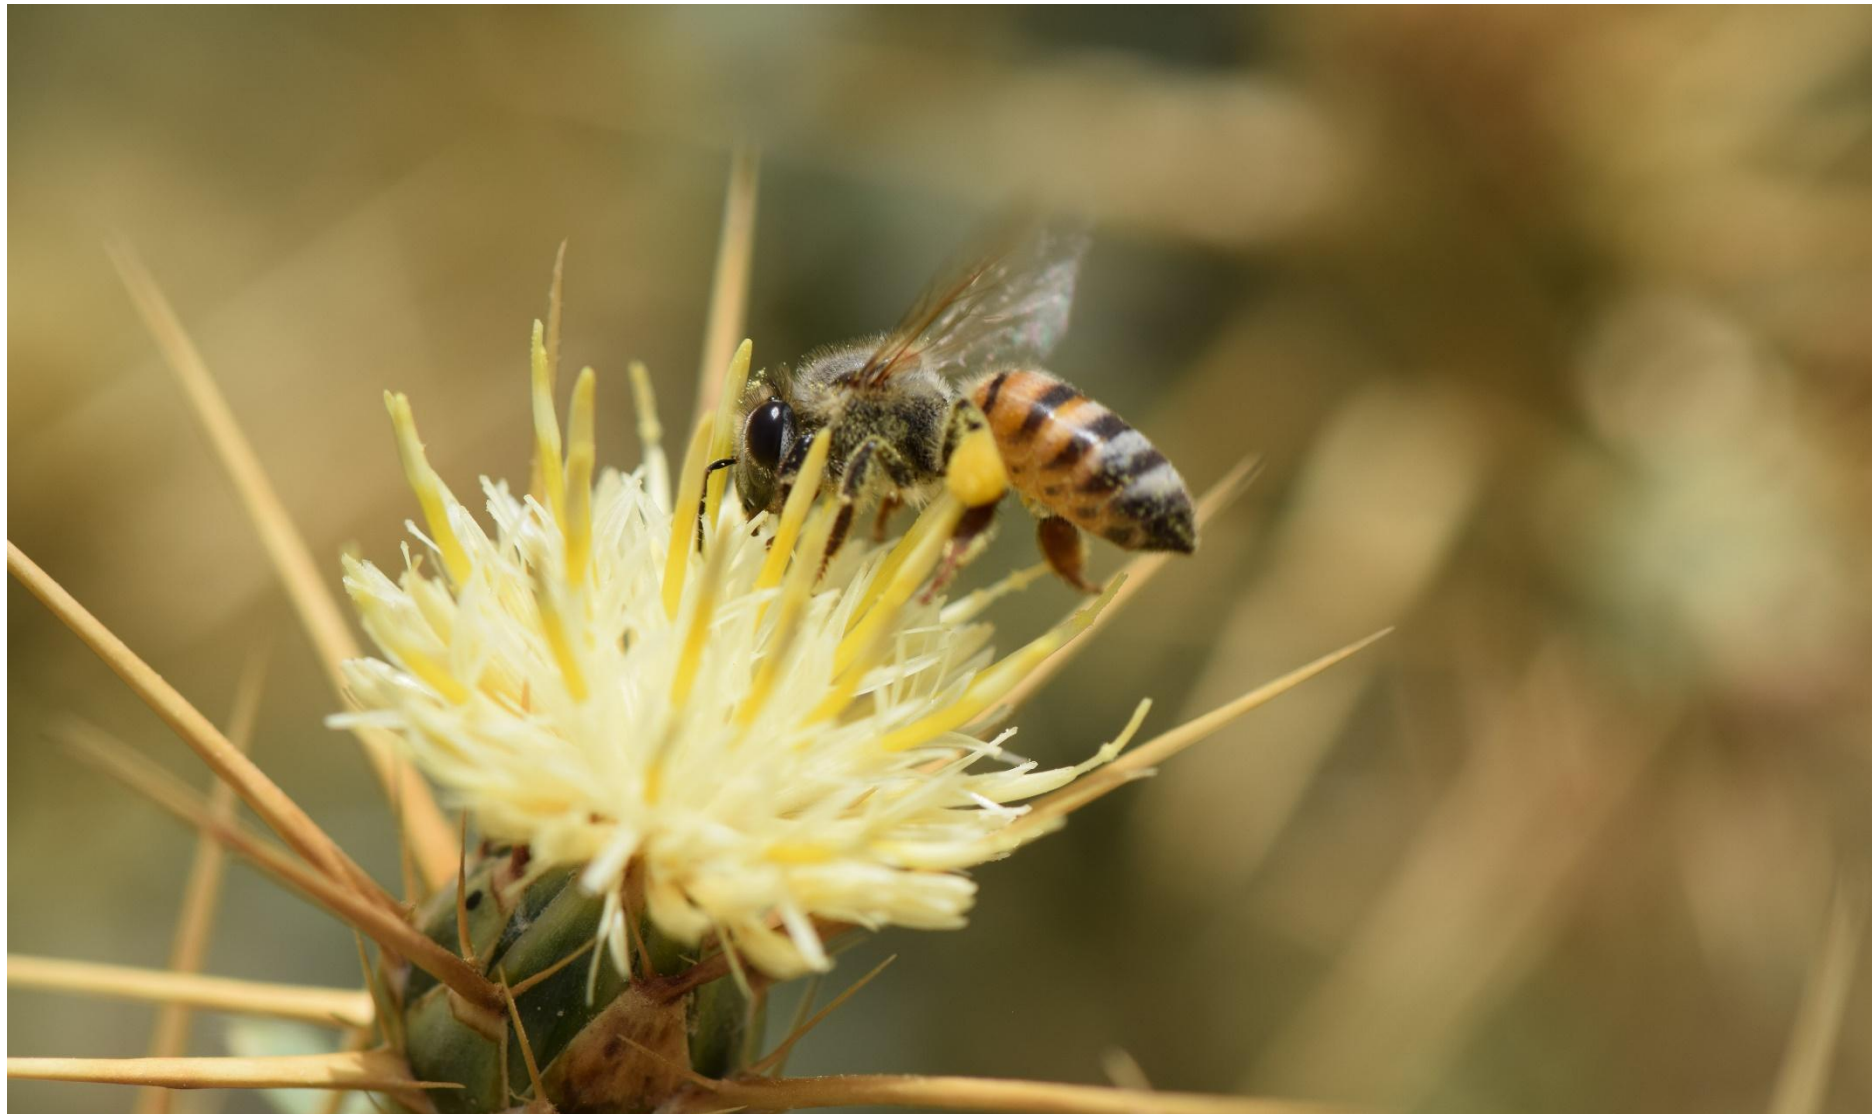

# ***Cichorium intybus***

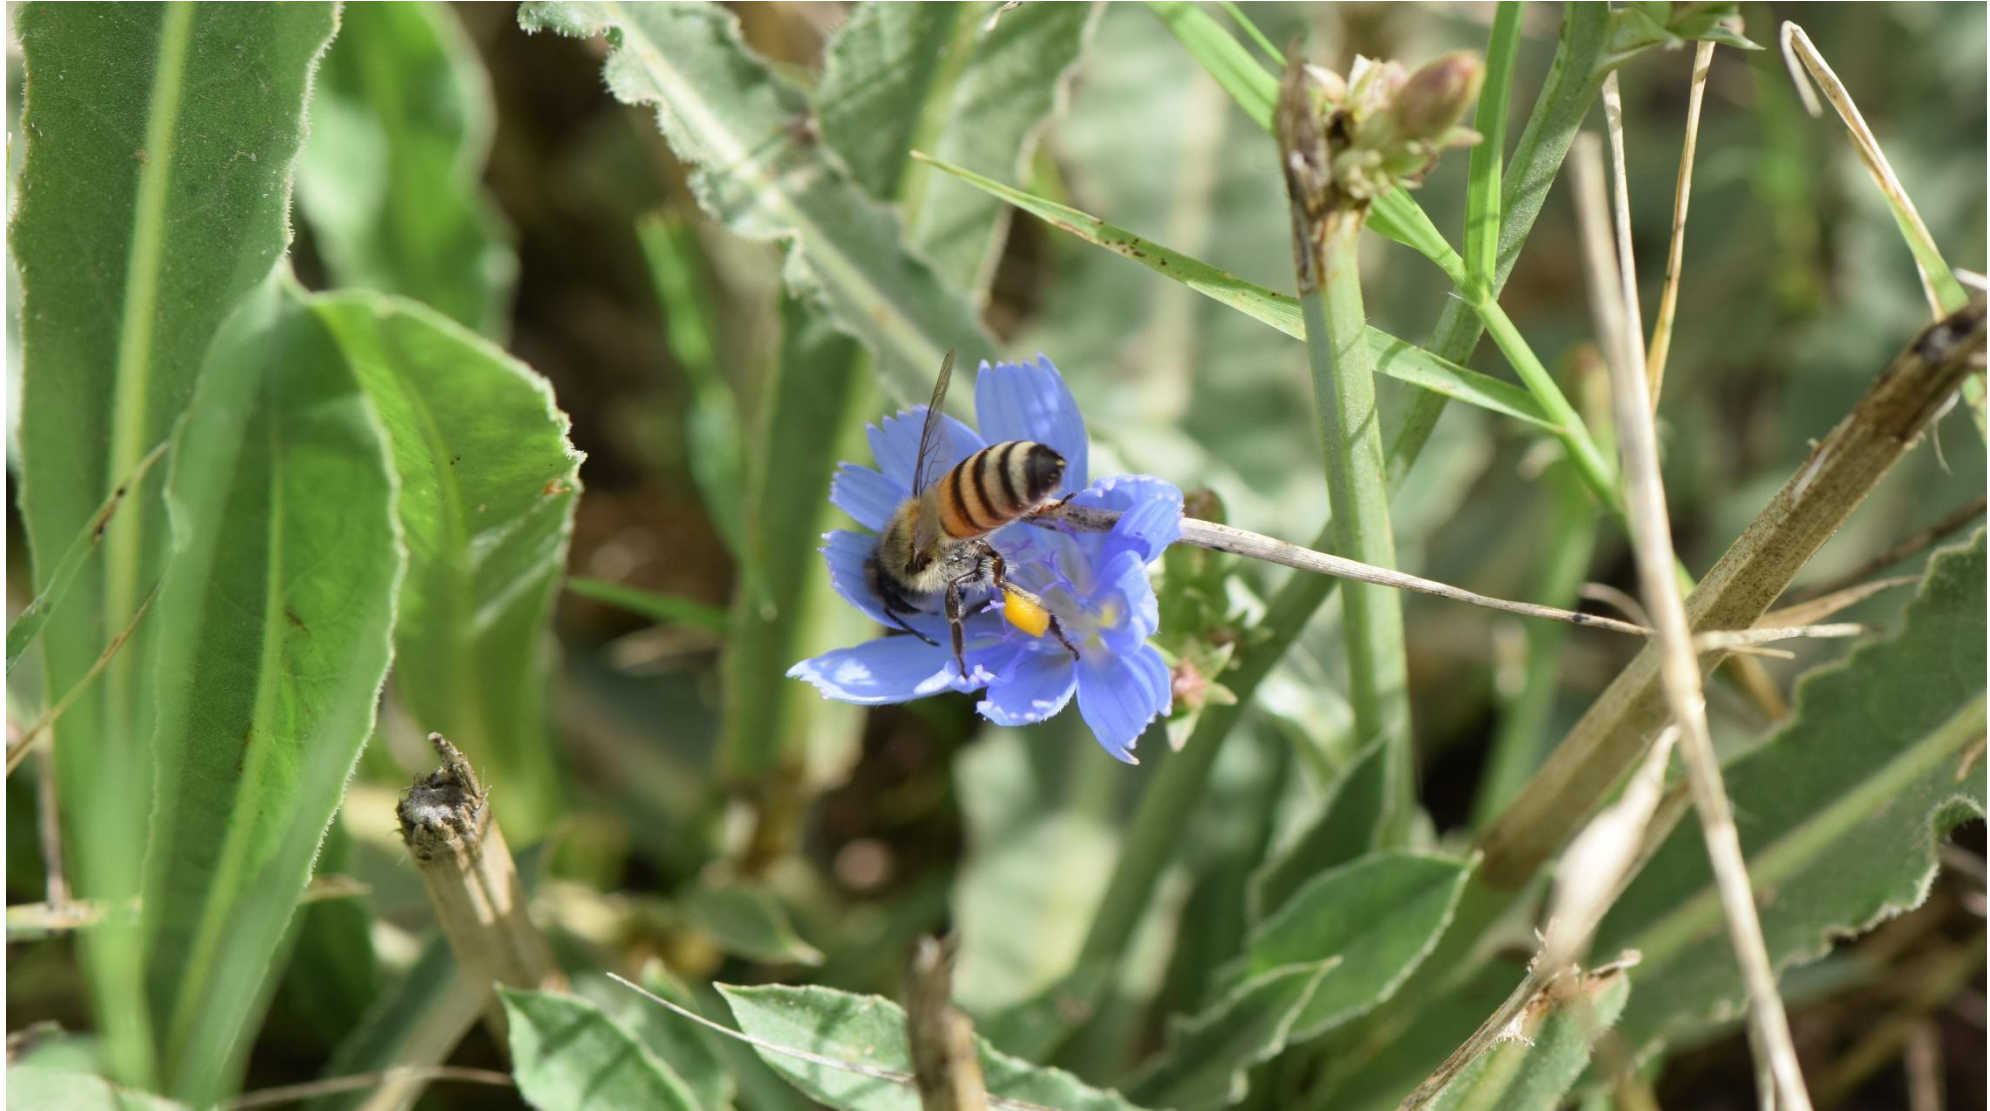



# ***Clematis hirsuta***

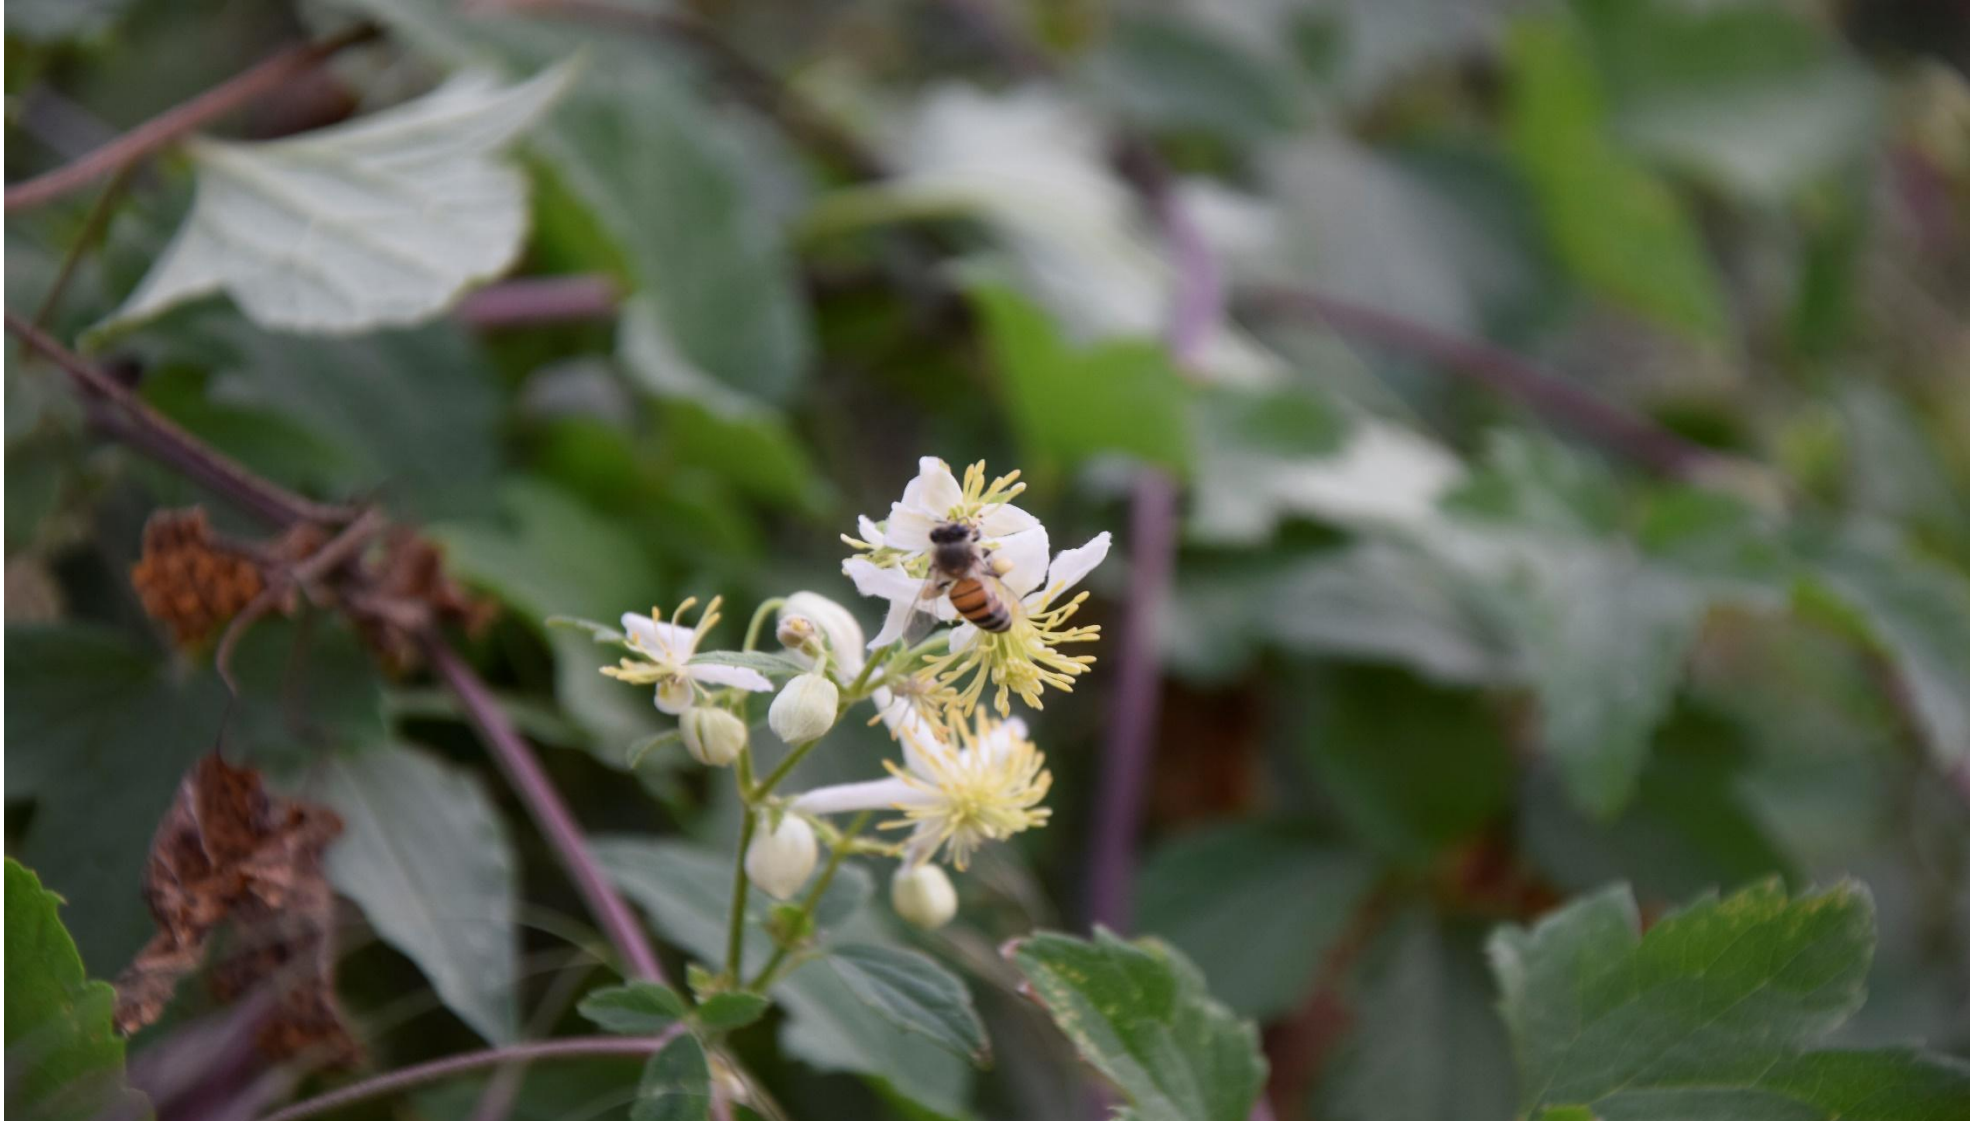

# ***Cleome pallida***

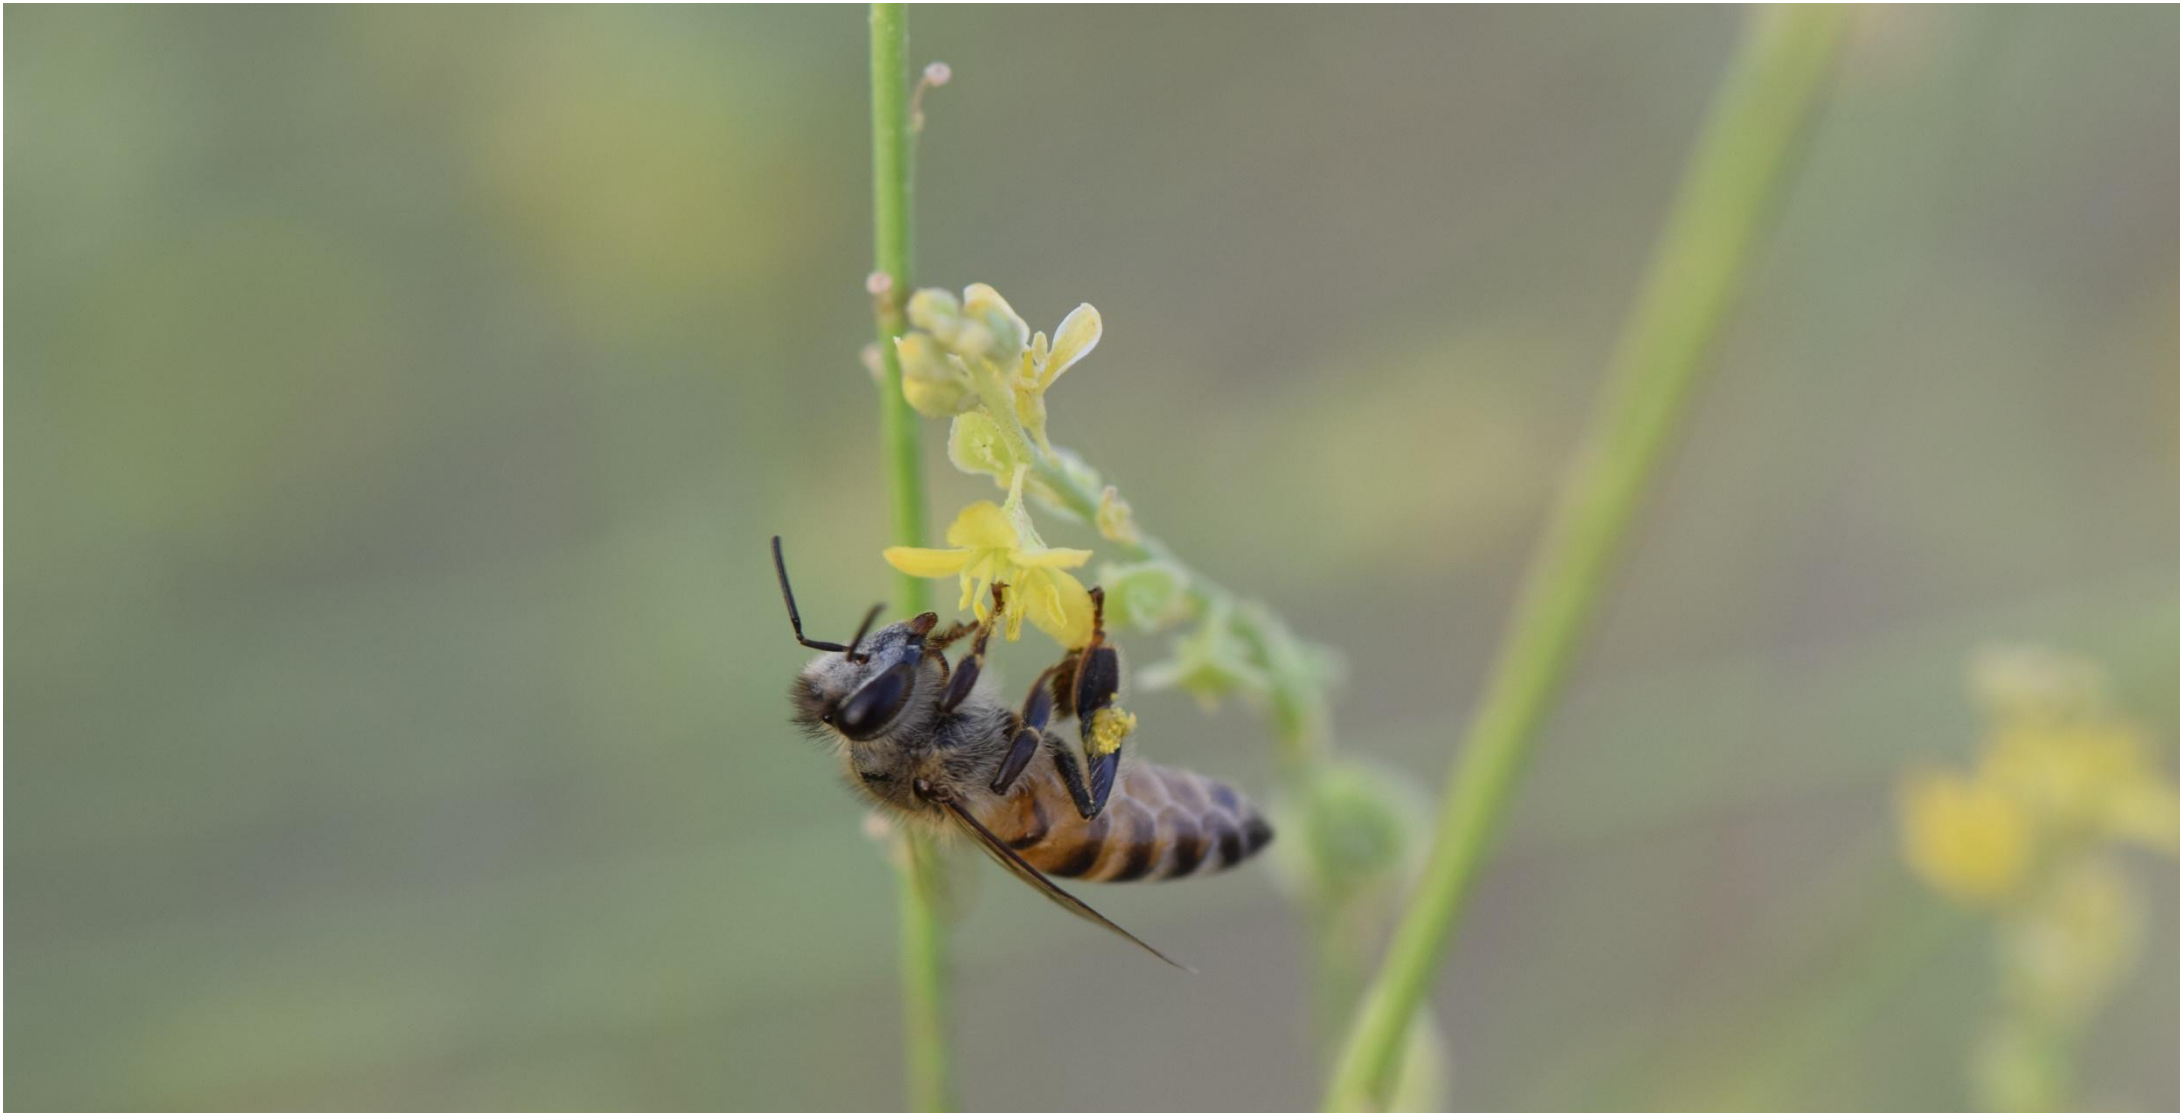



# *Cleome chrysantha*

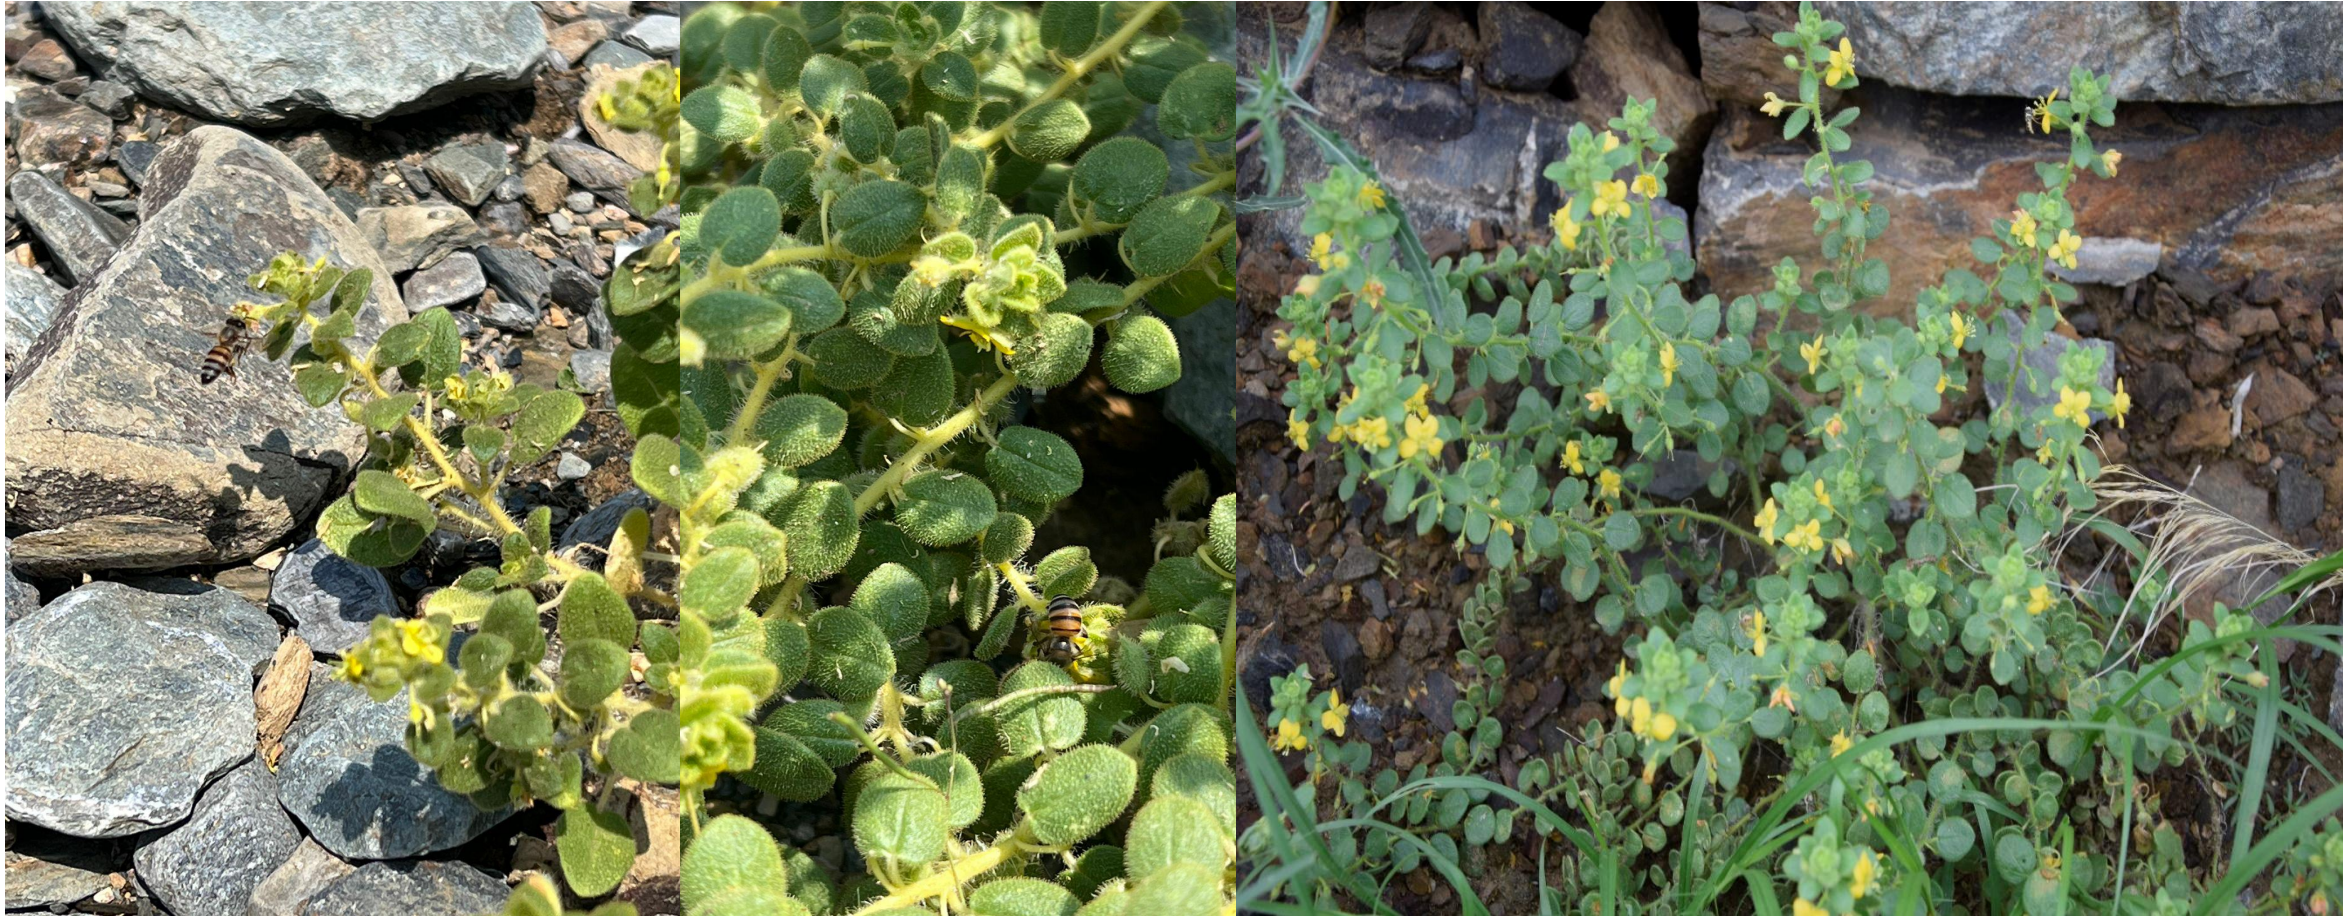



# ***Brassica tournefortii***

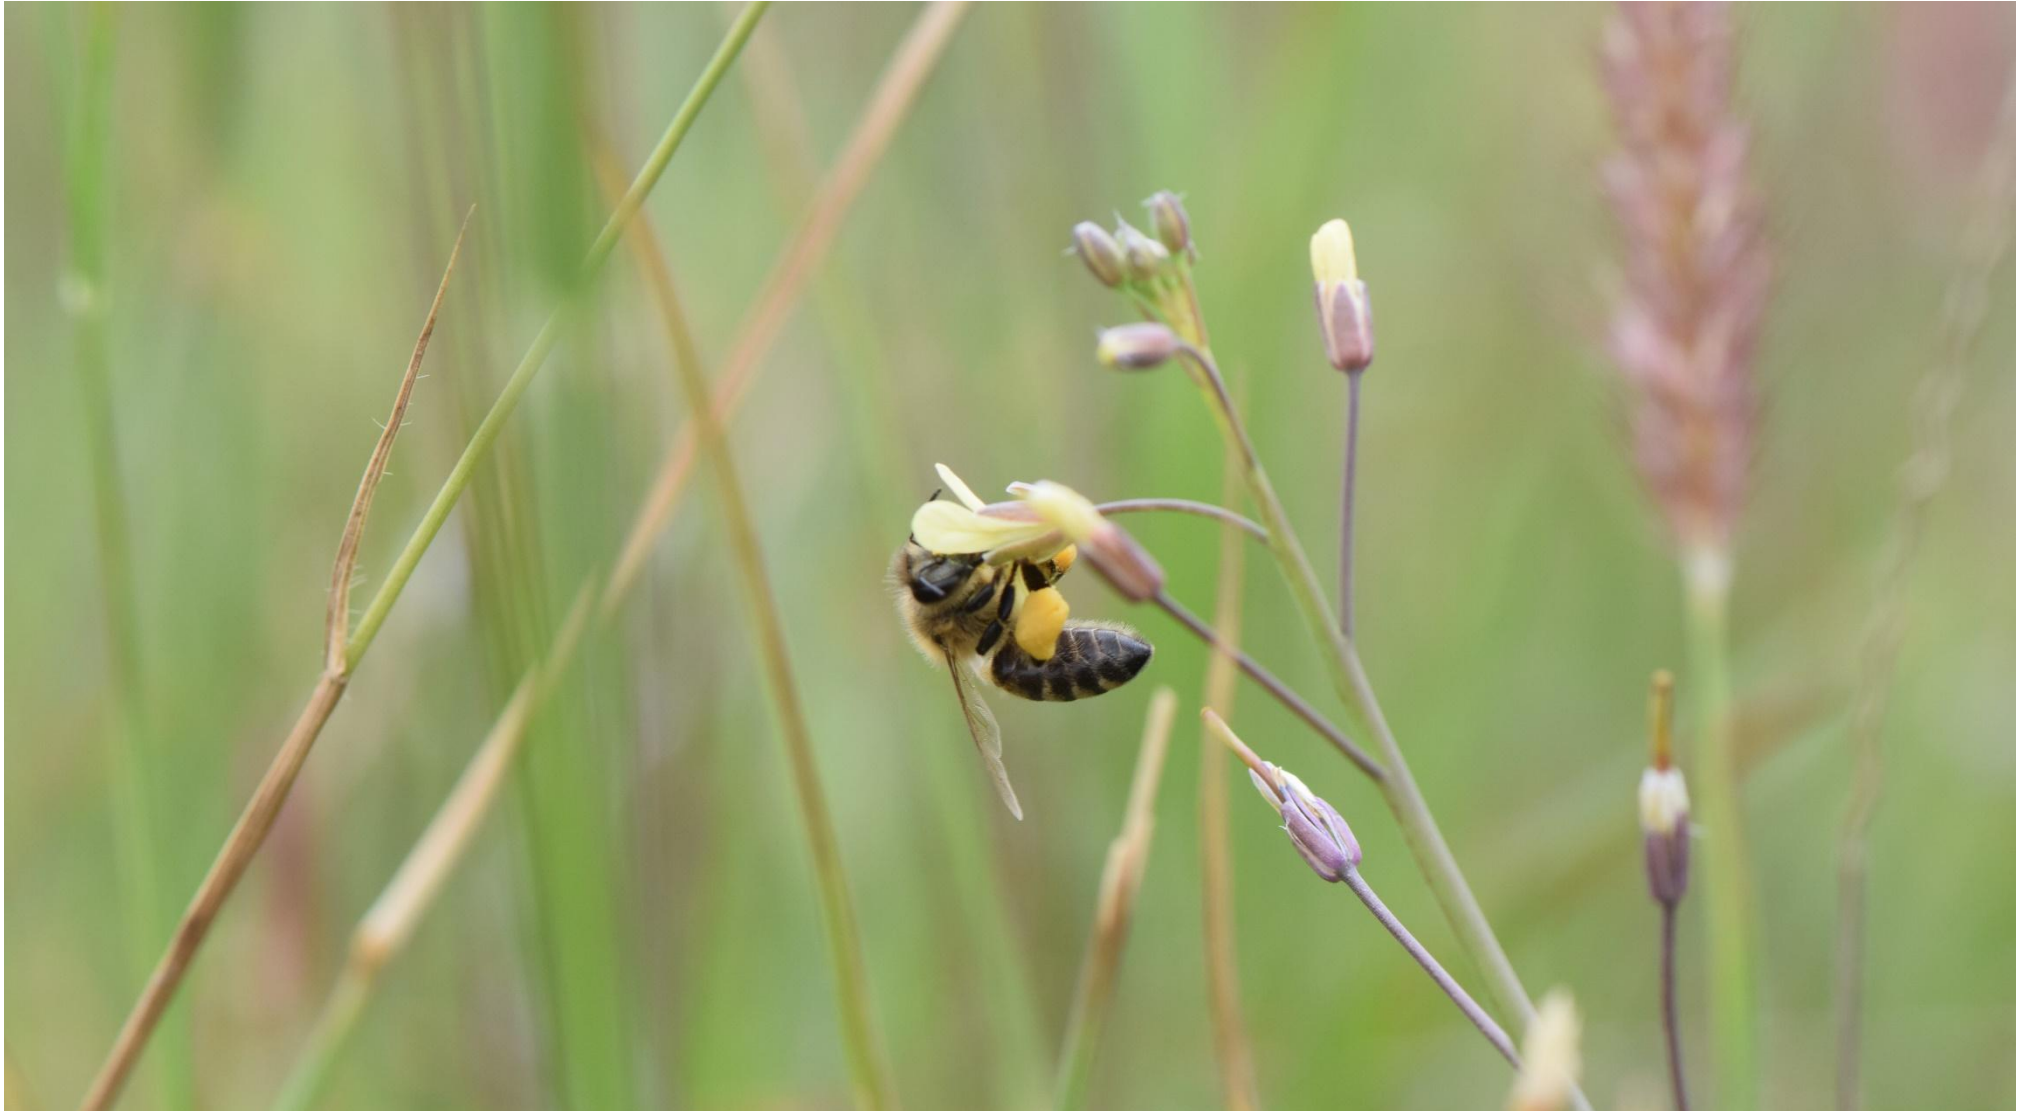



# ***Convolvulus arvensis***

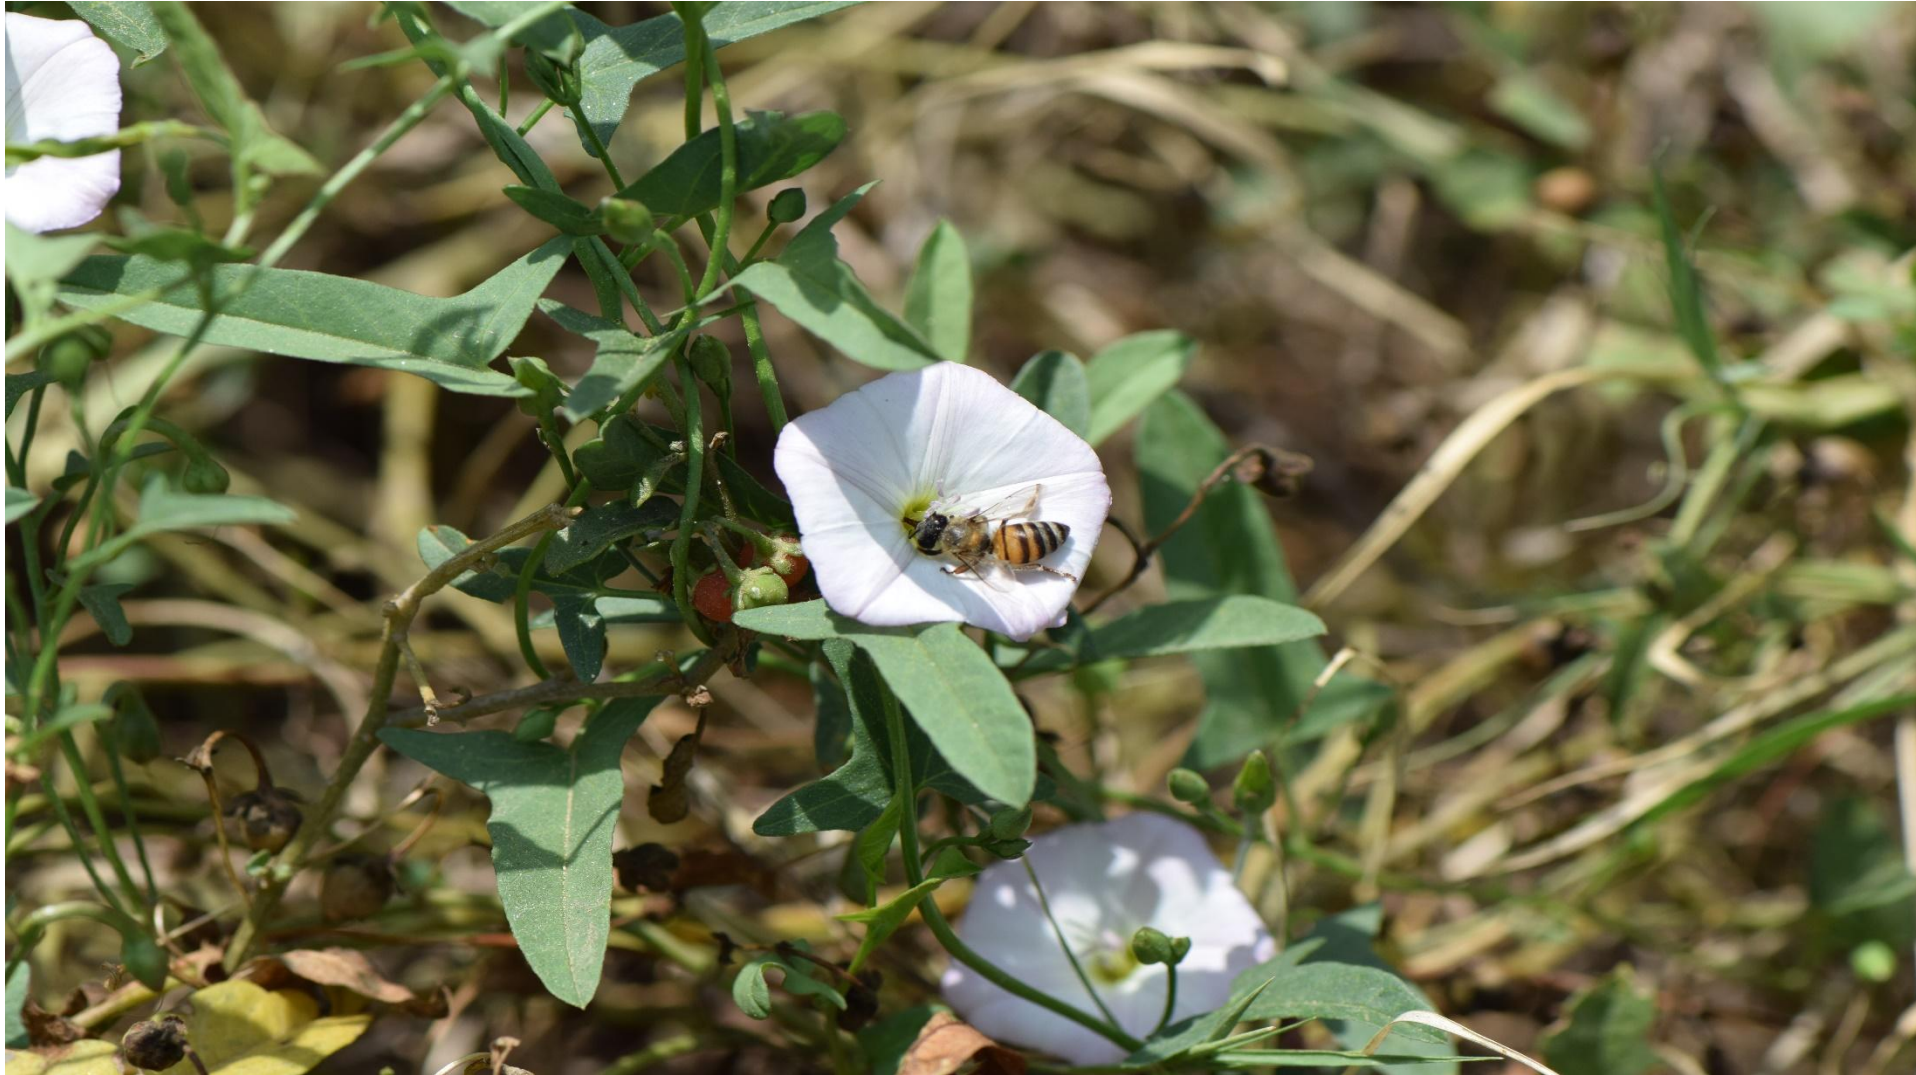



# *Cynanchum viminalis*

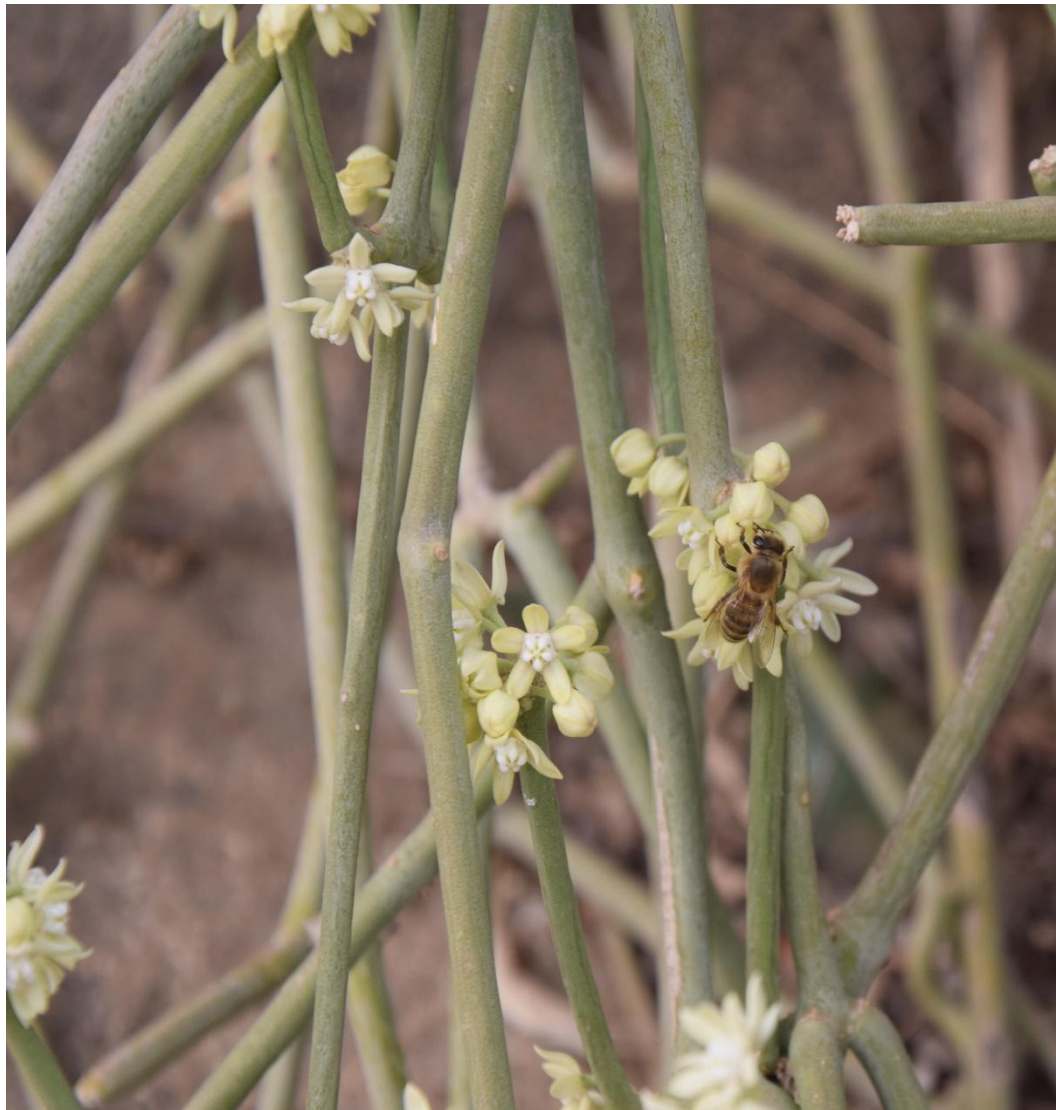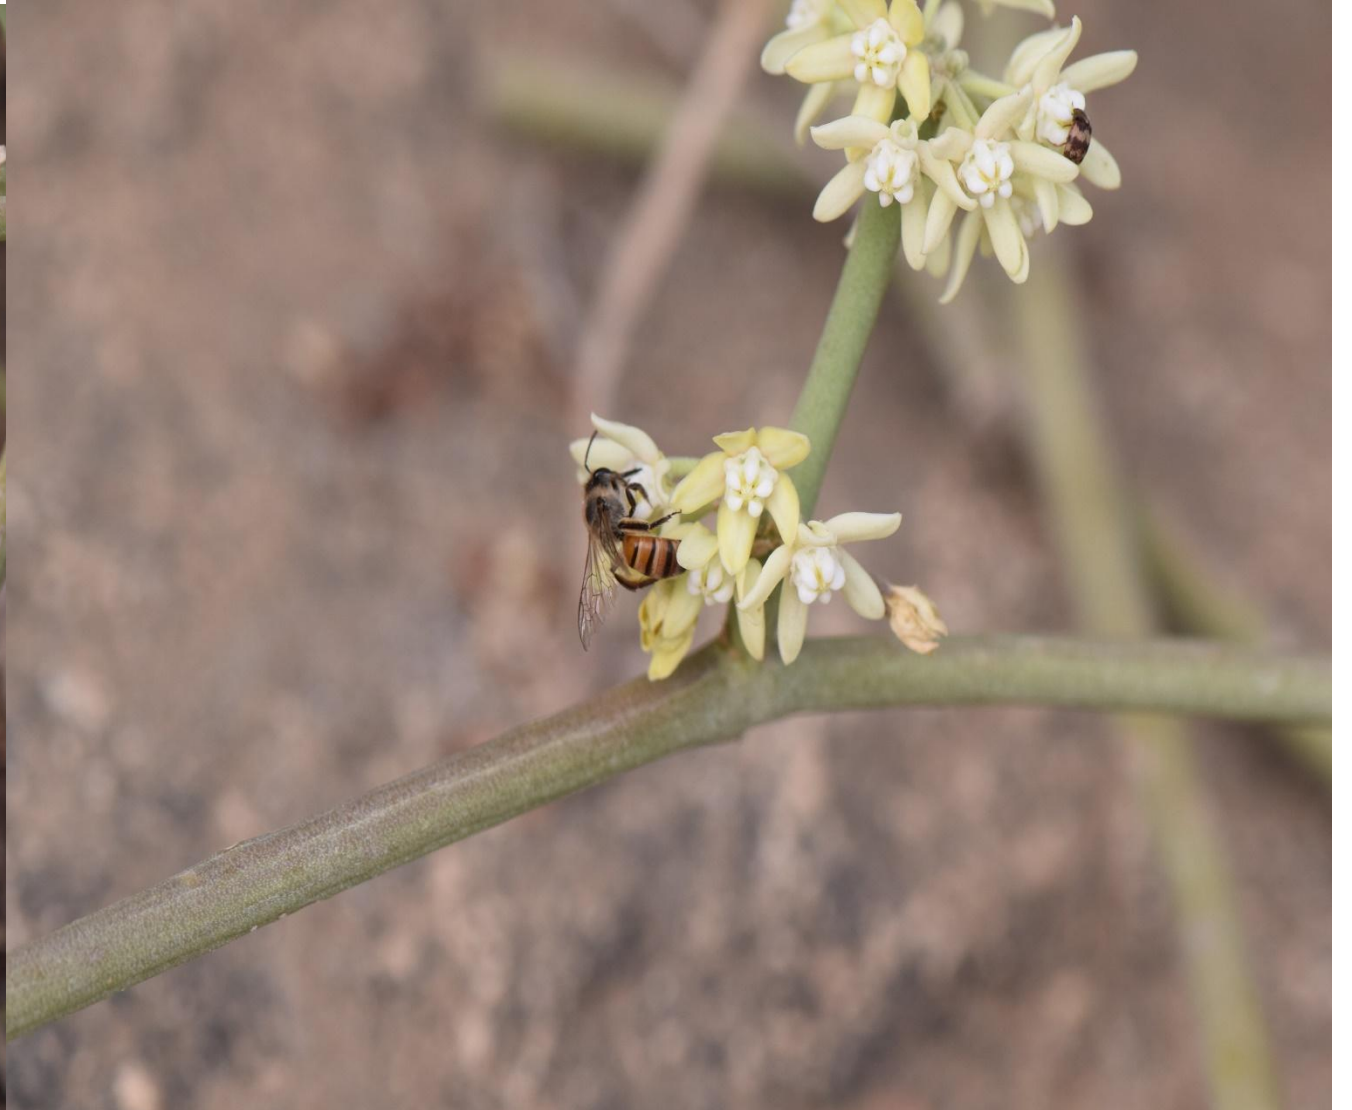



# ***Cynodon dactylon***

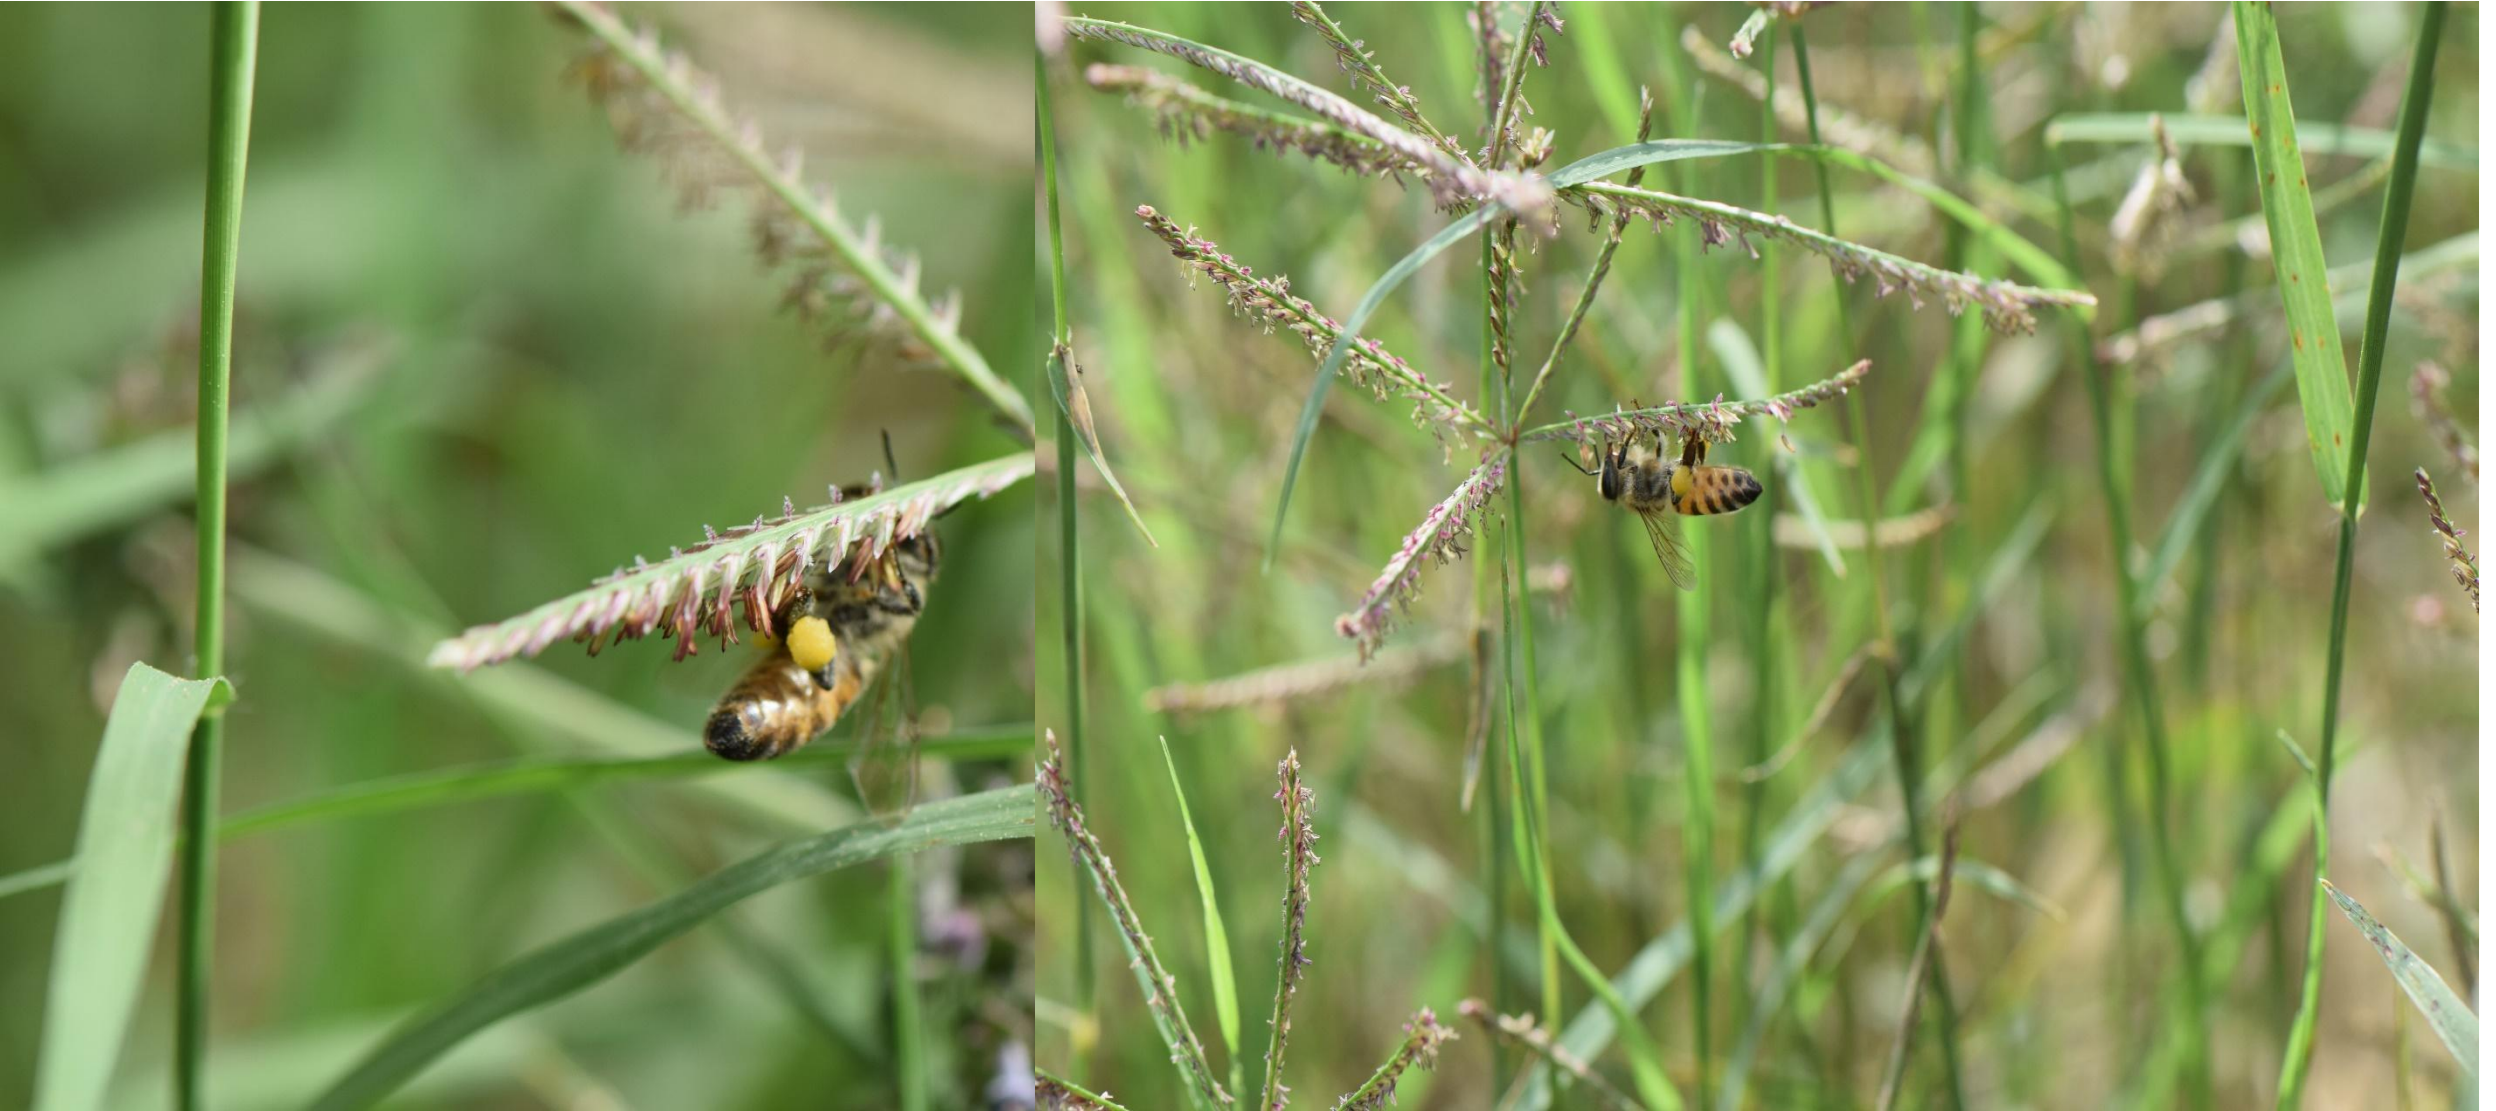



# *Delonix elata*

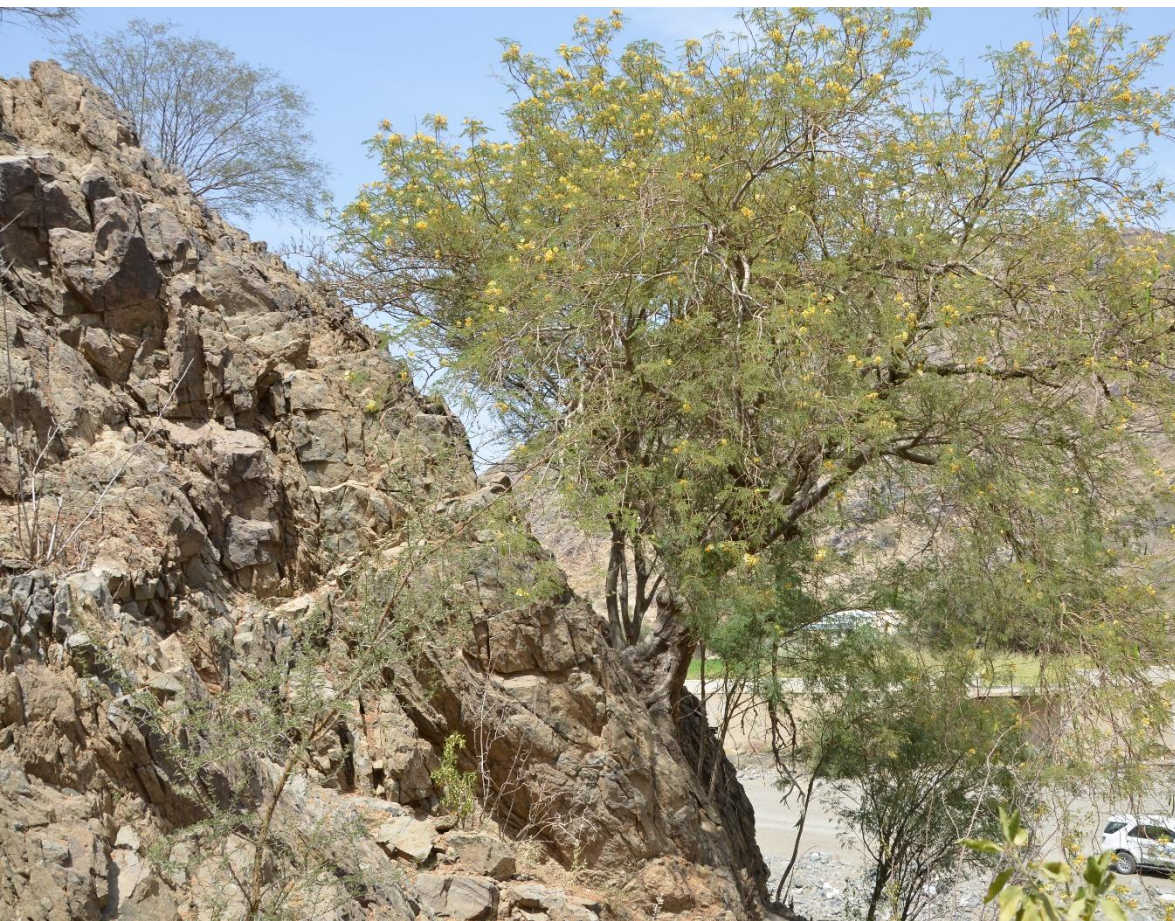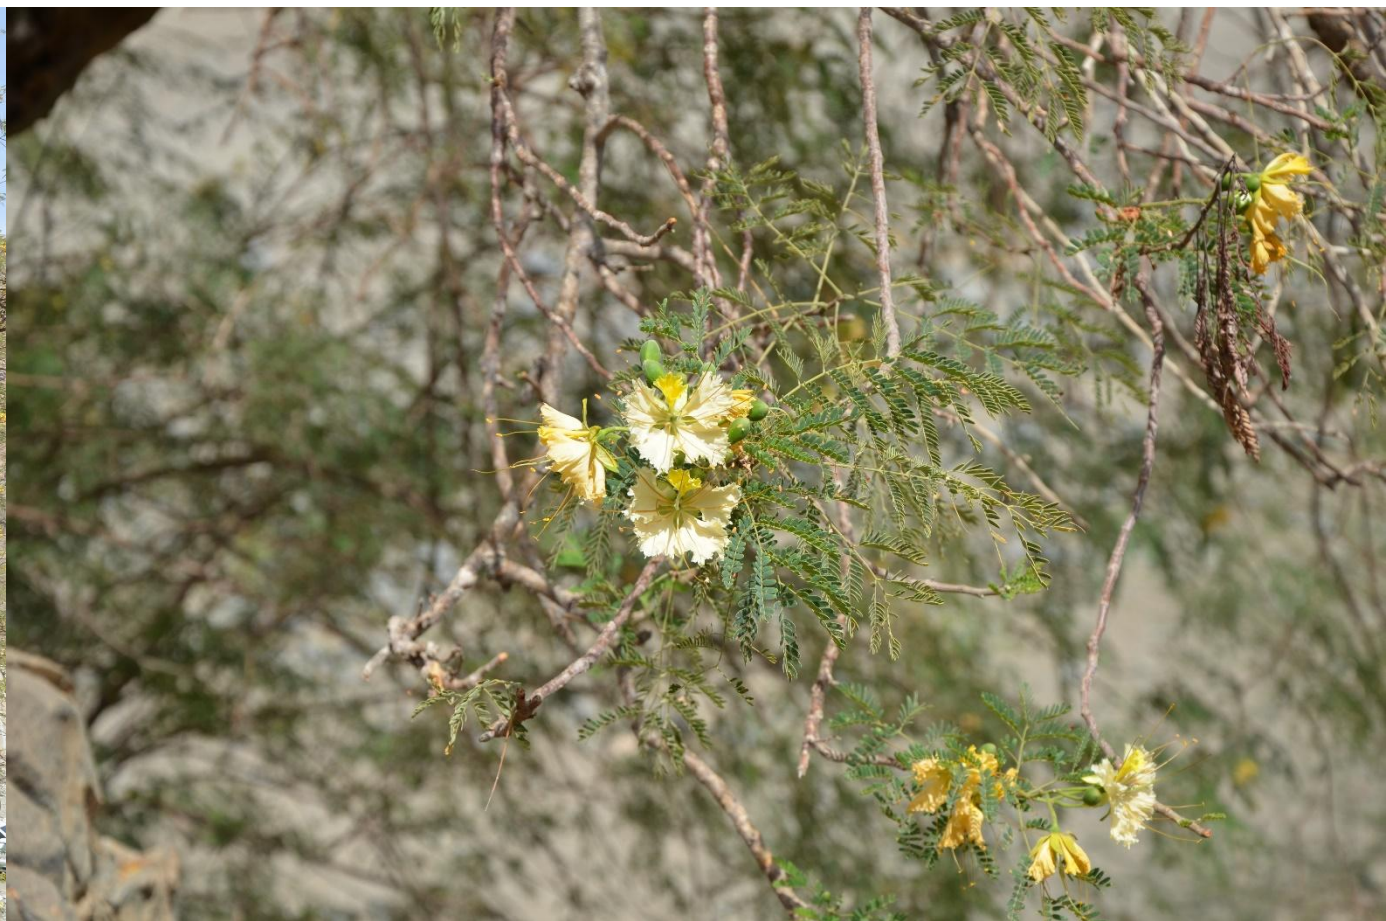



# *Dodonaea viscosa*

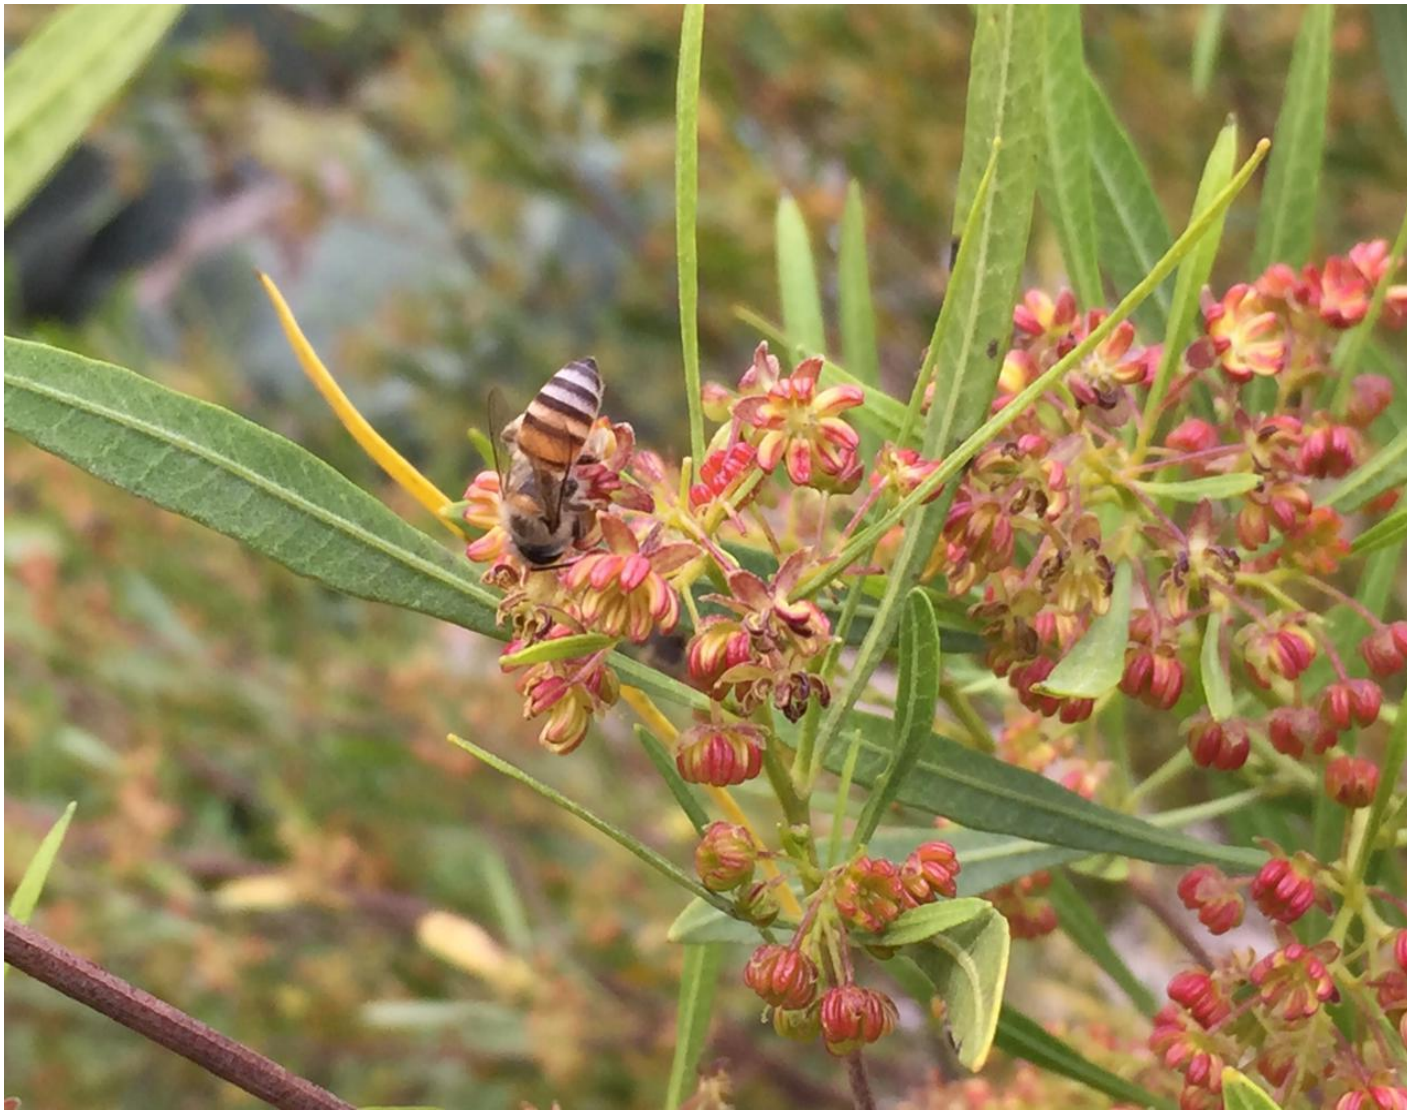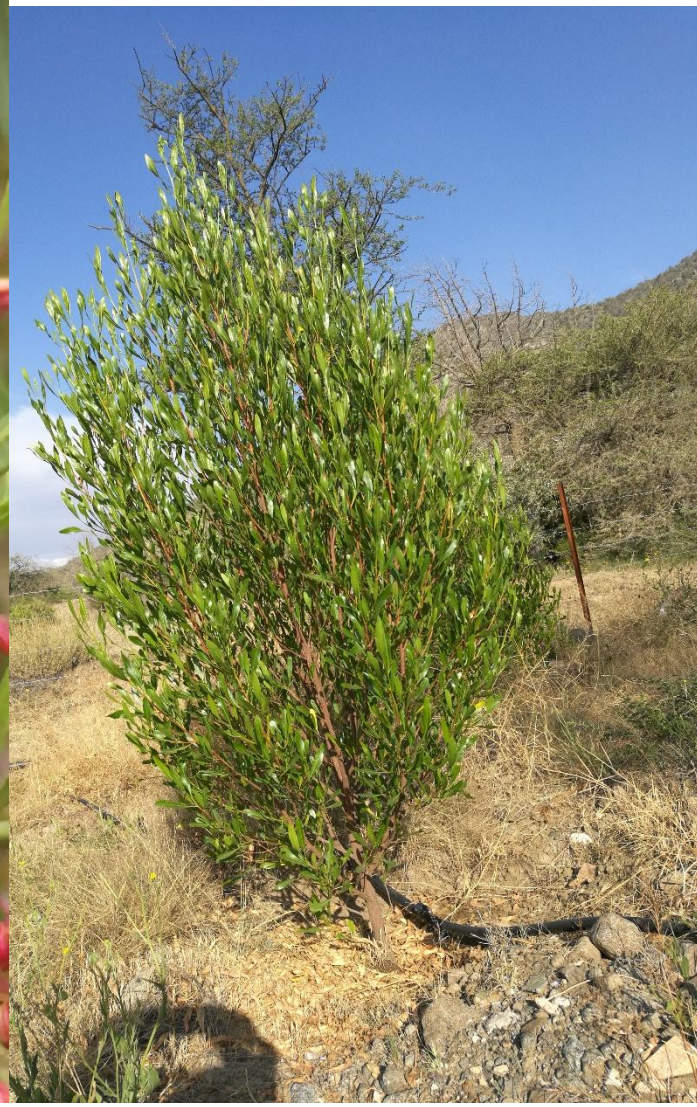



# *Echinops sp*

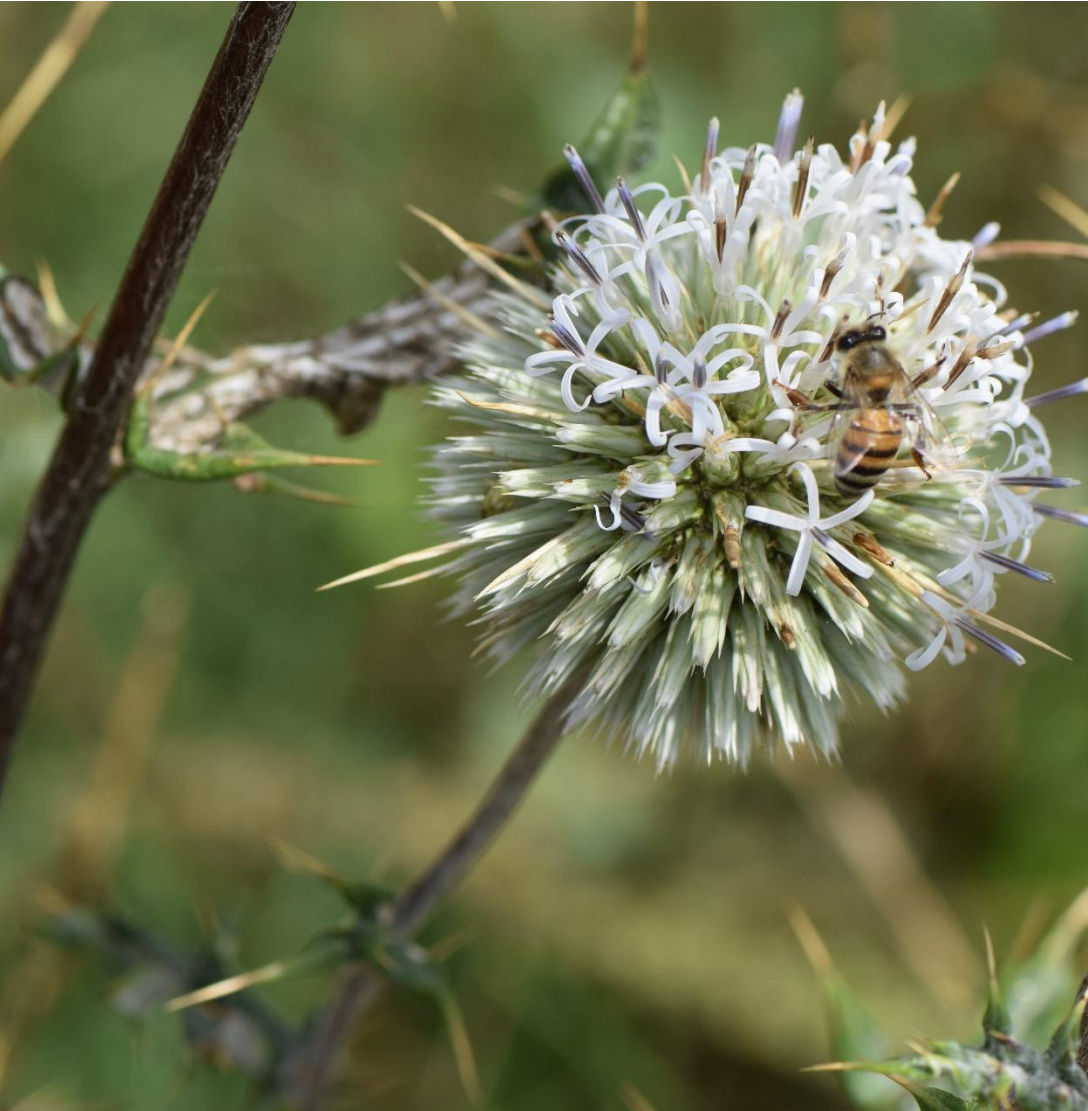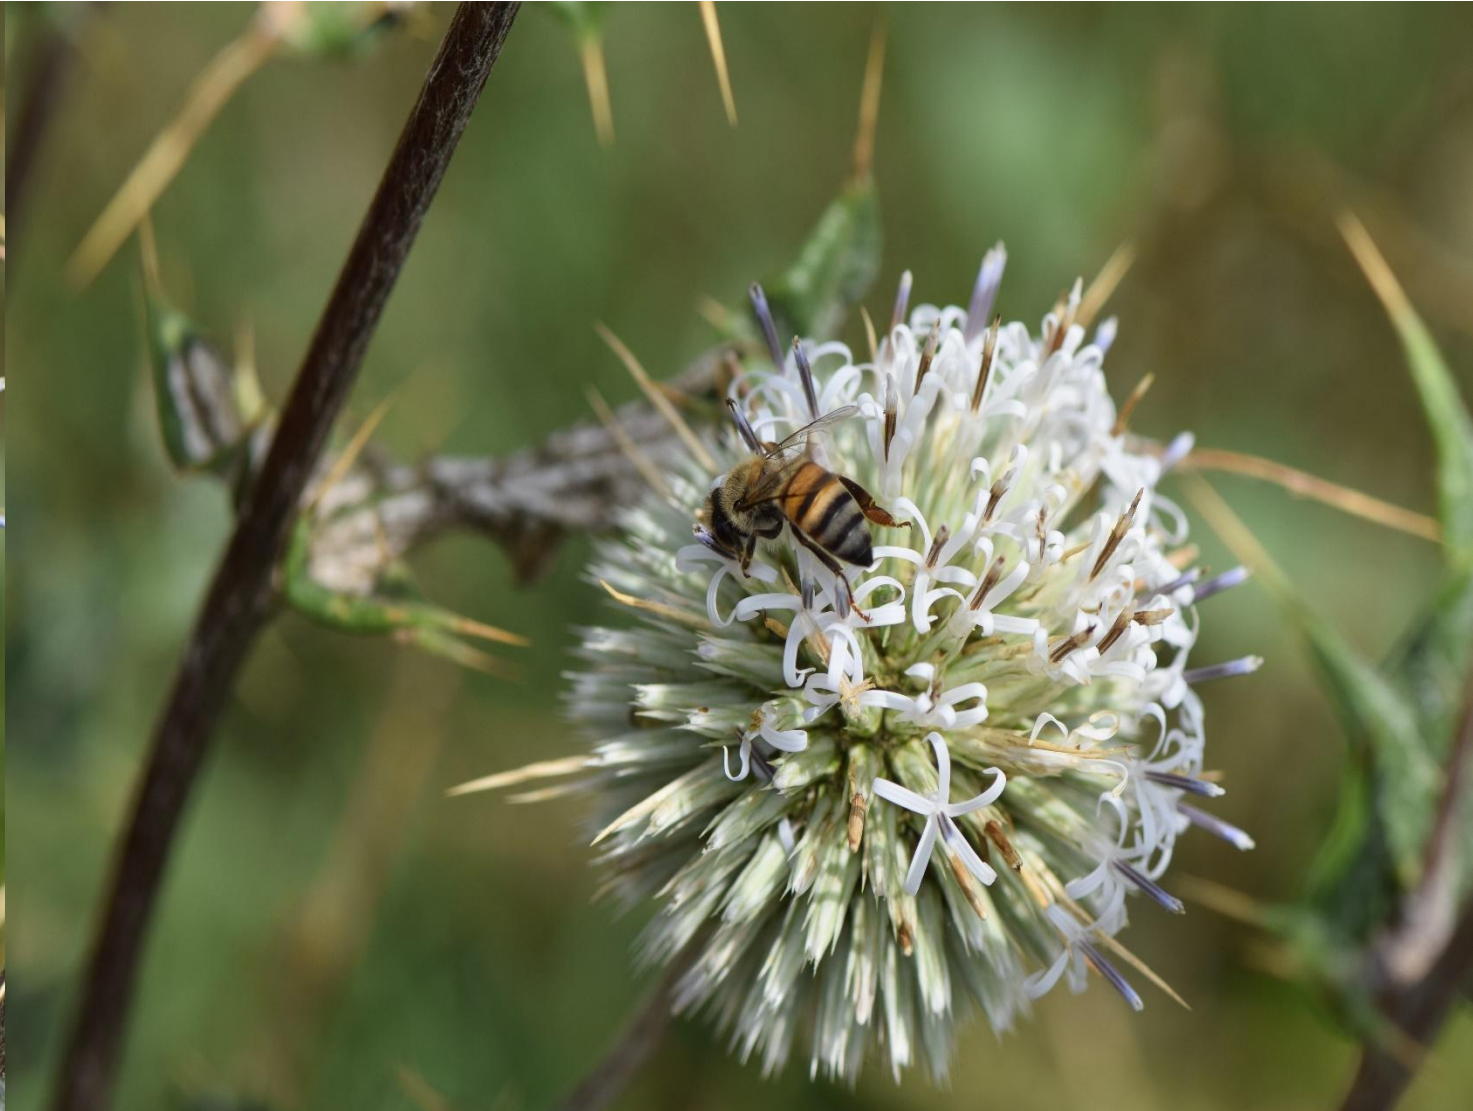



# *Echium rauwolfii*

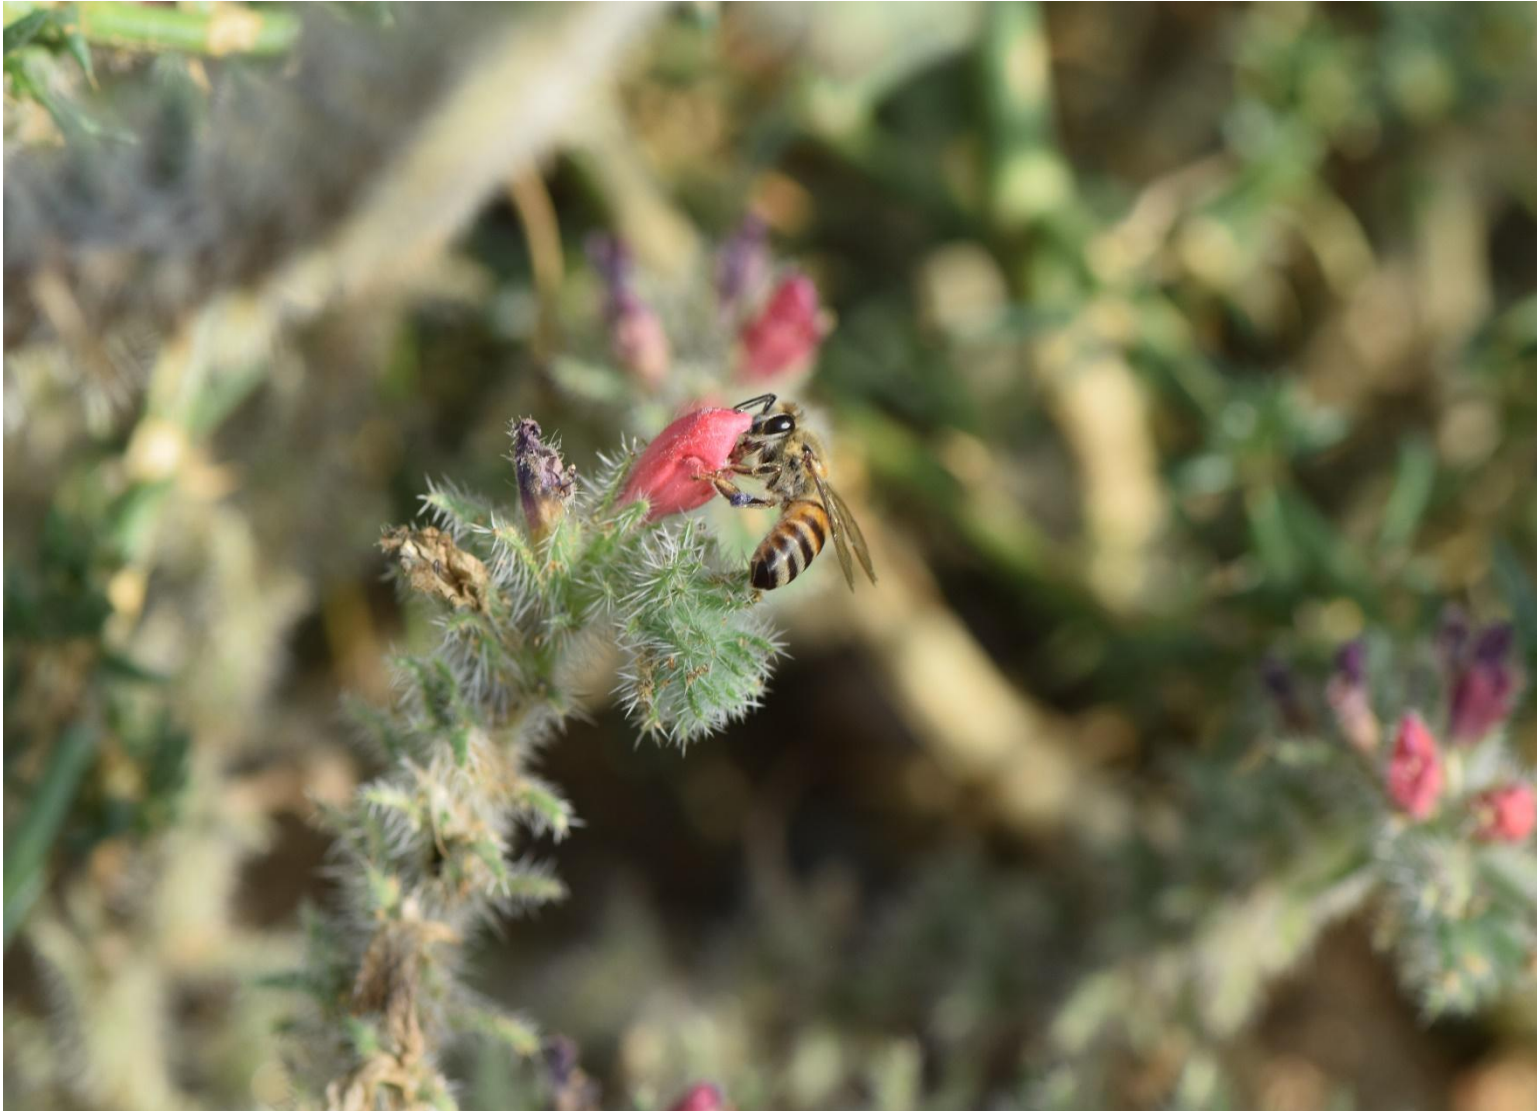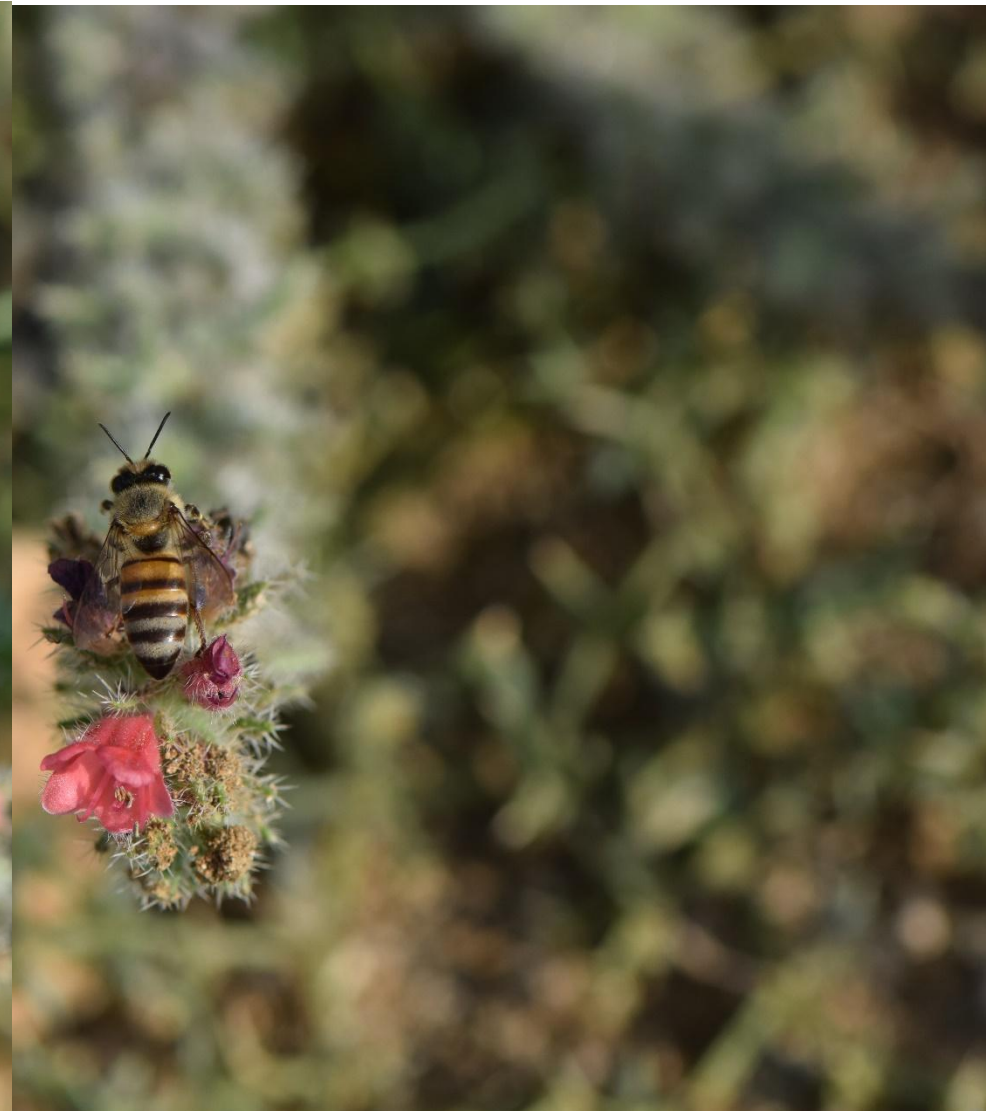

# ***Eruca sativa***

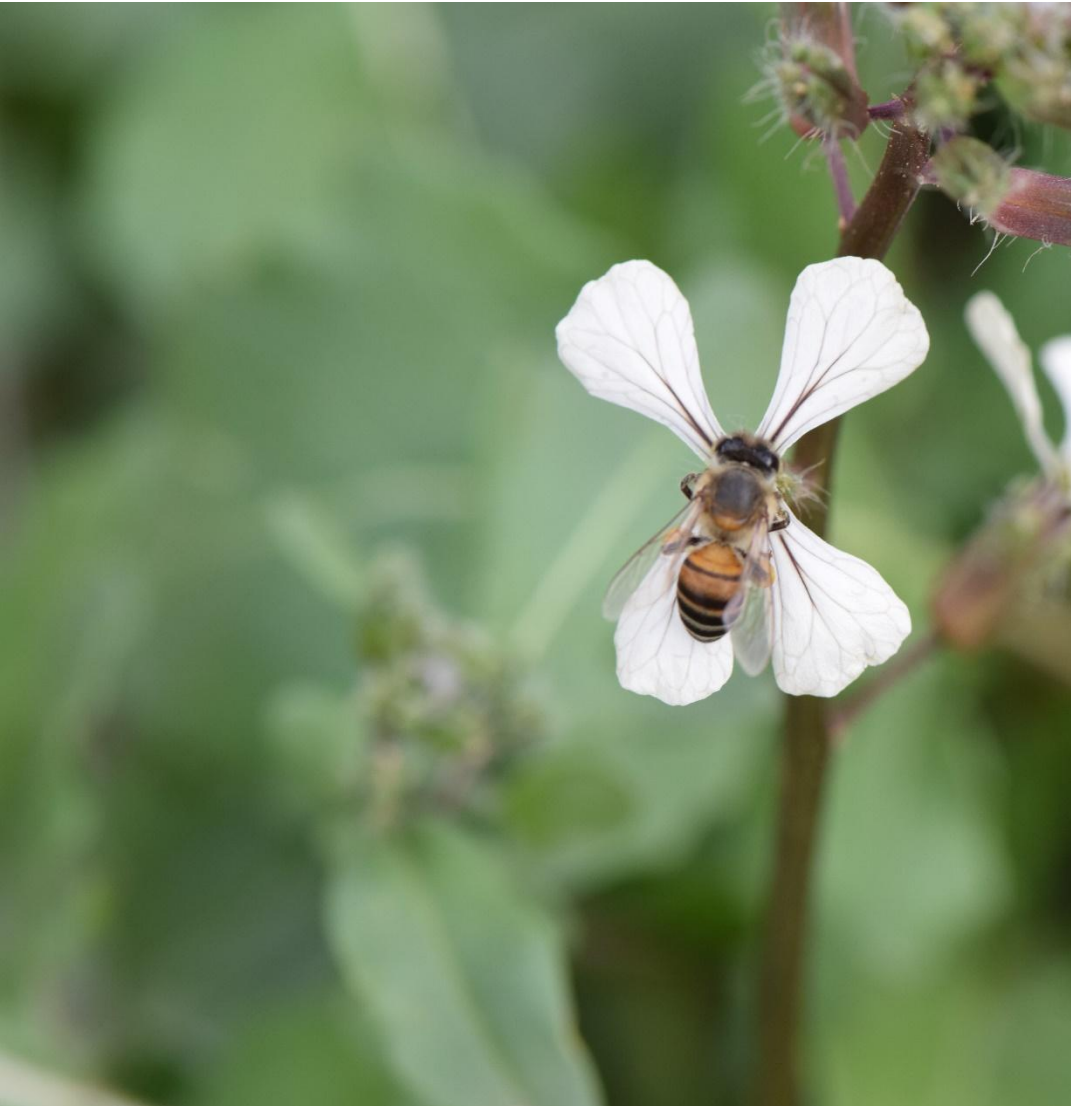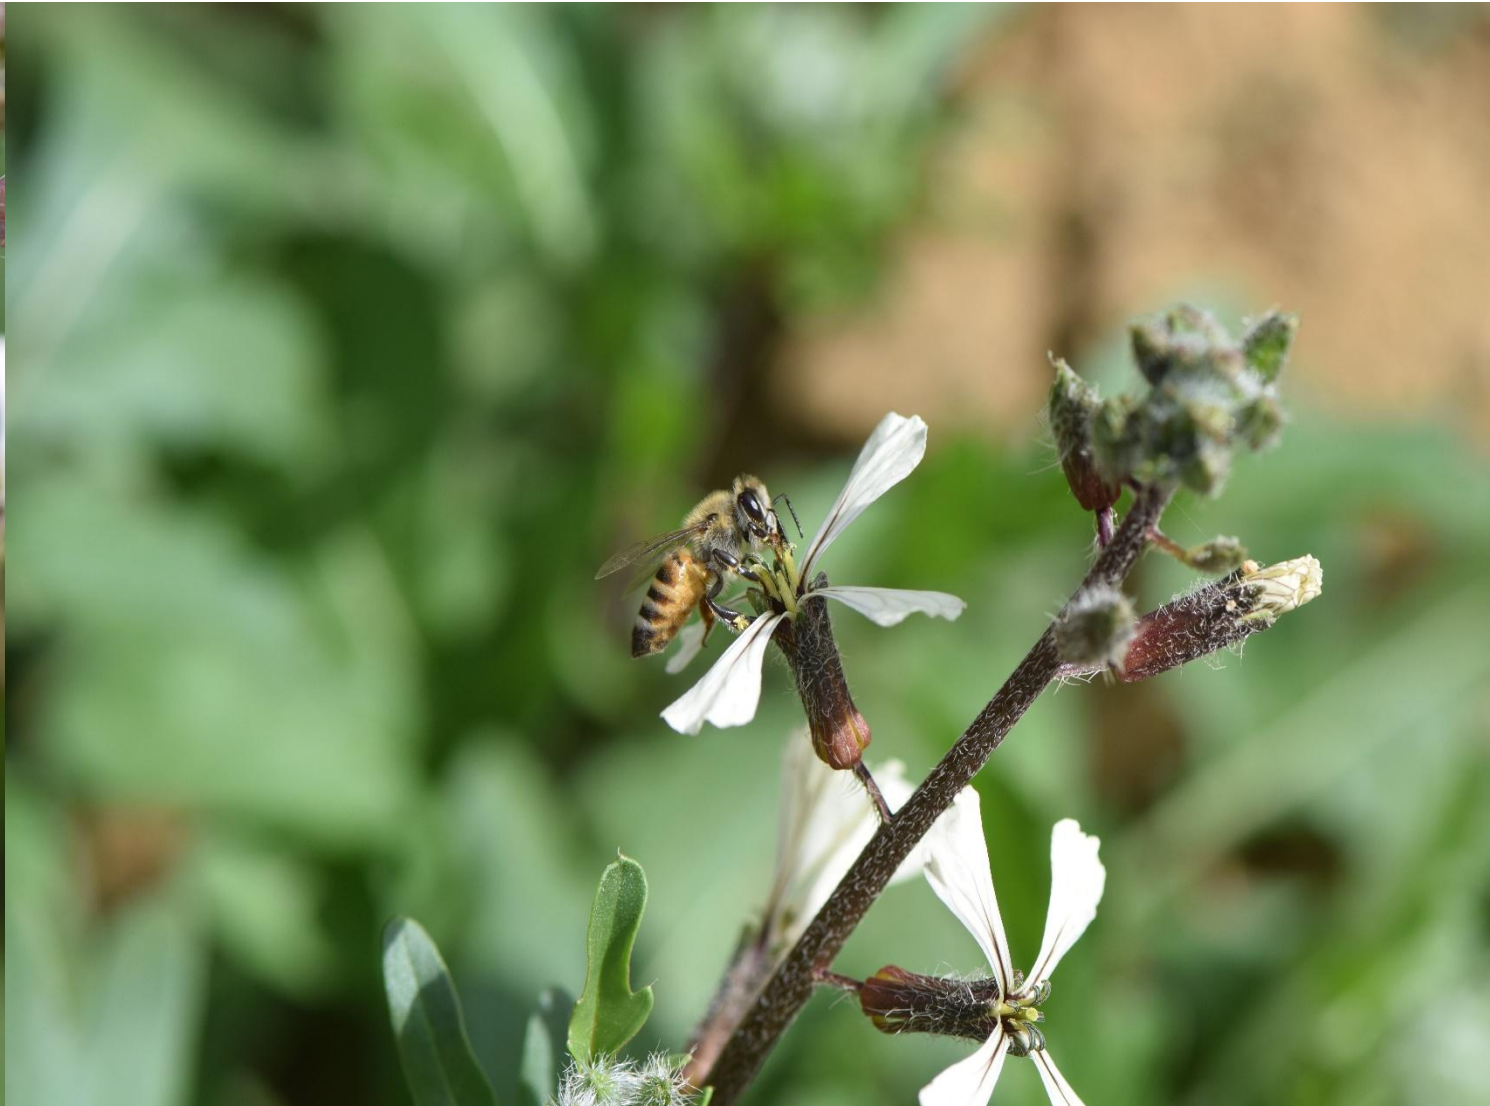



# ***Euphorbia cuneata***

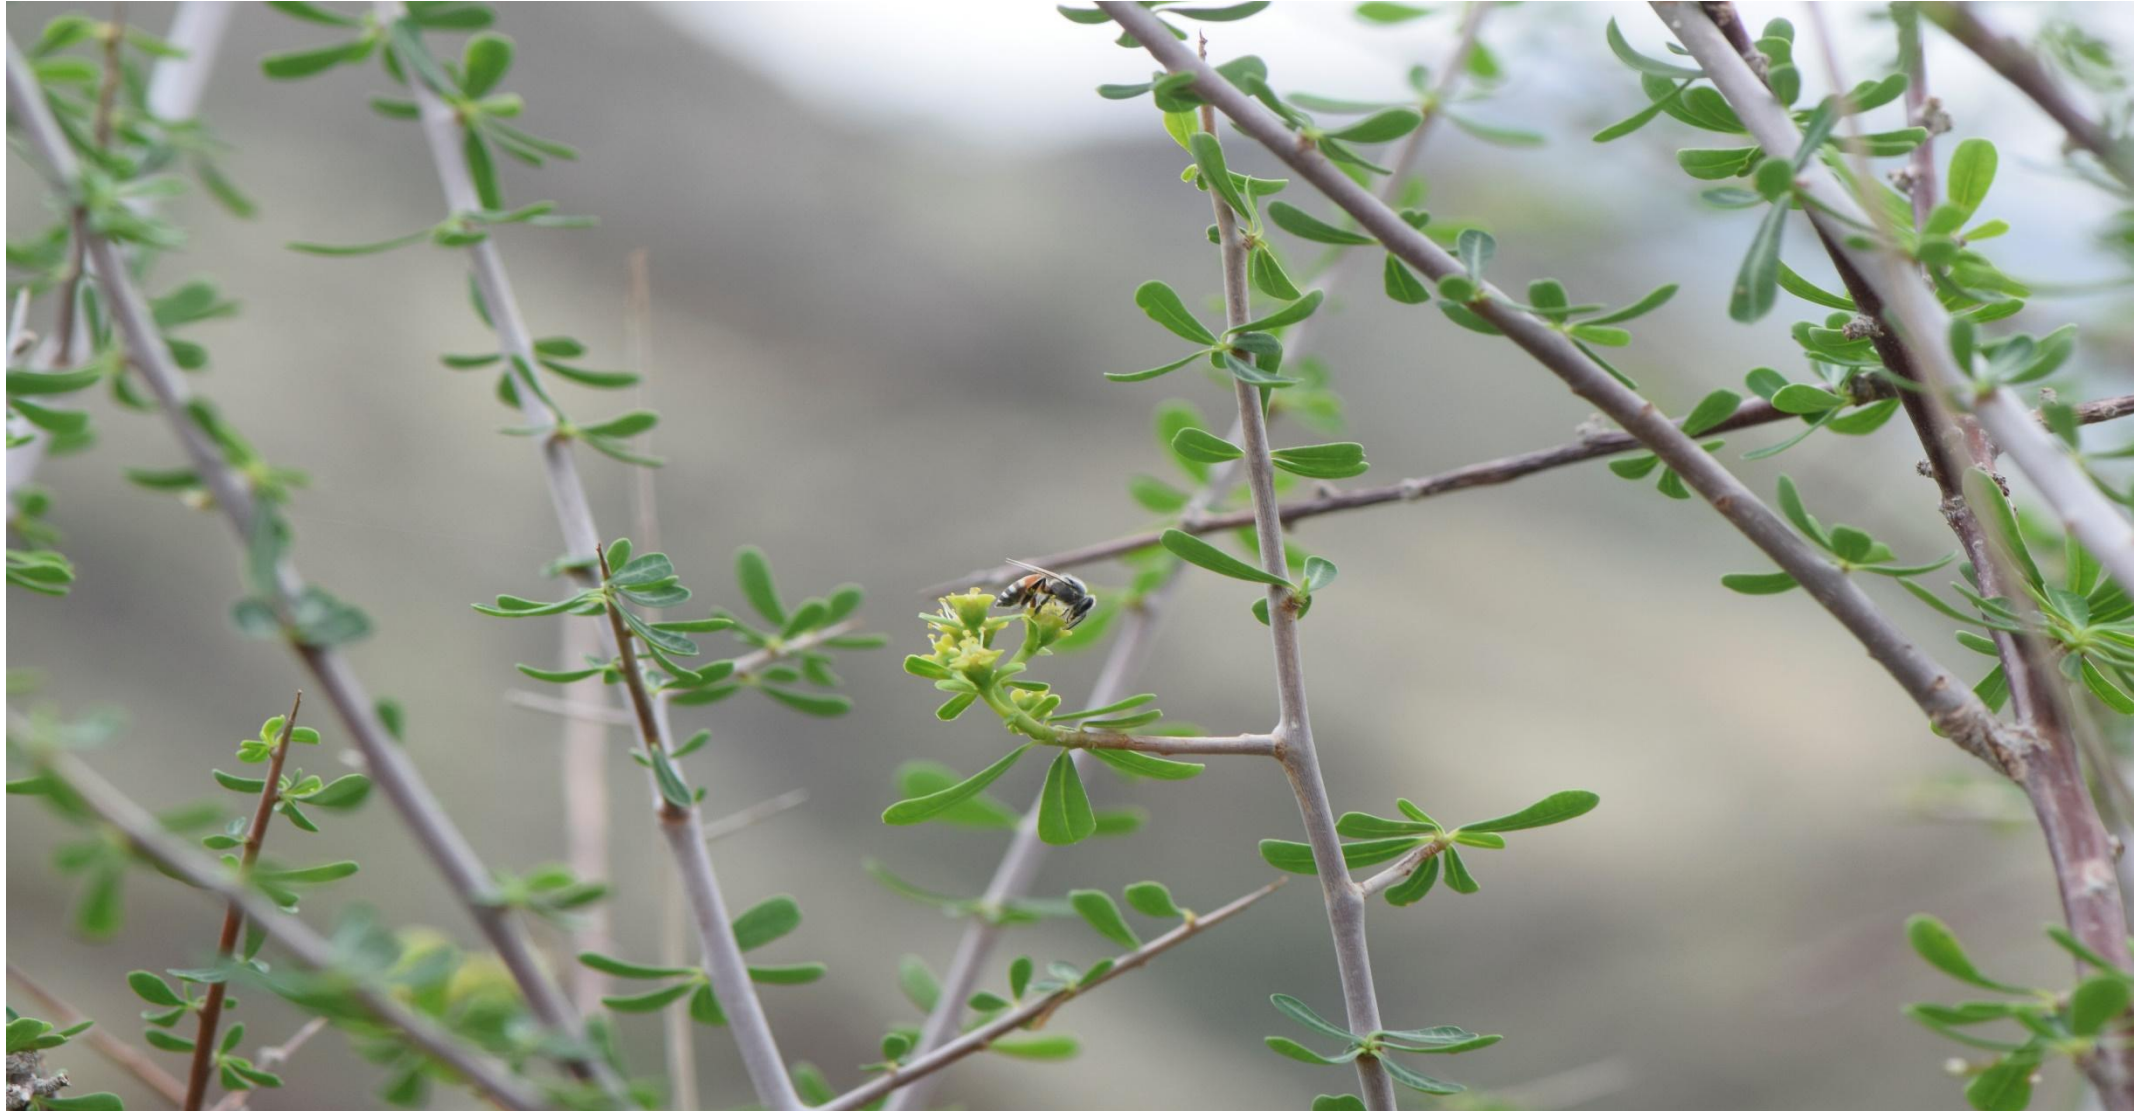



# *Euphorbia inarticulate*

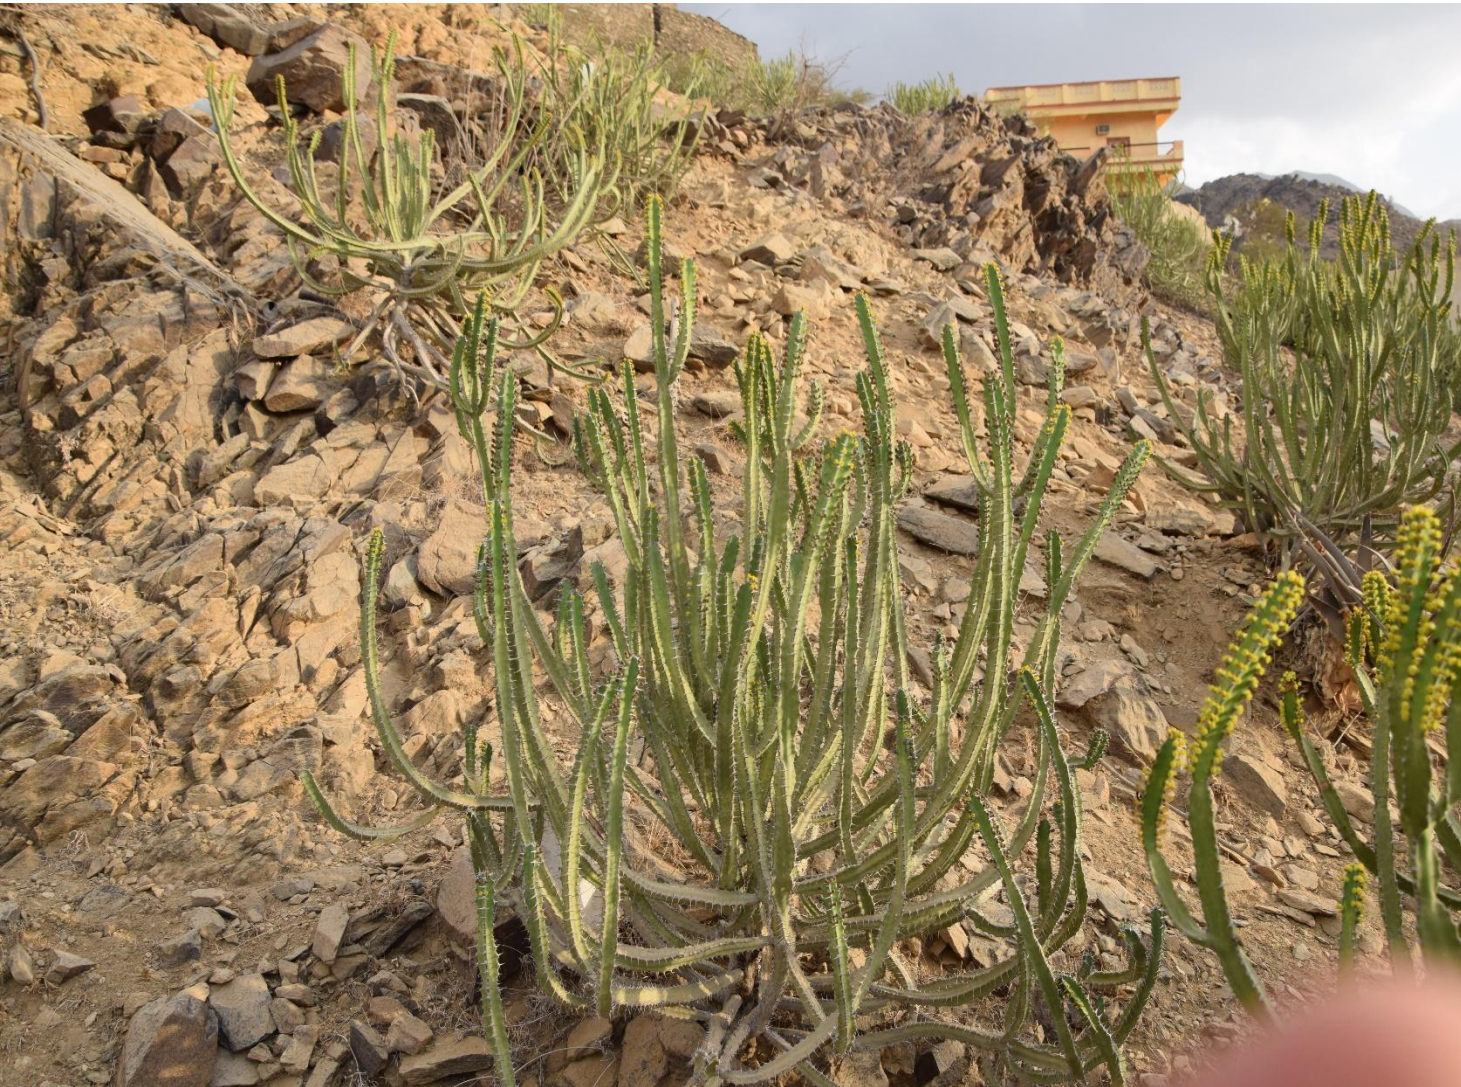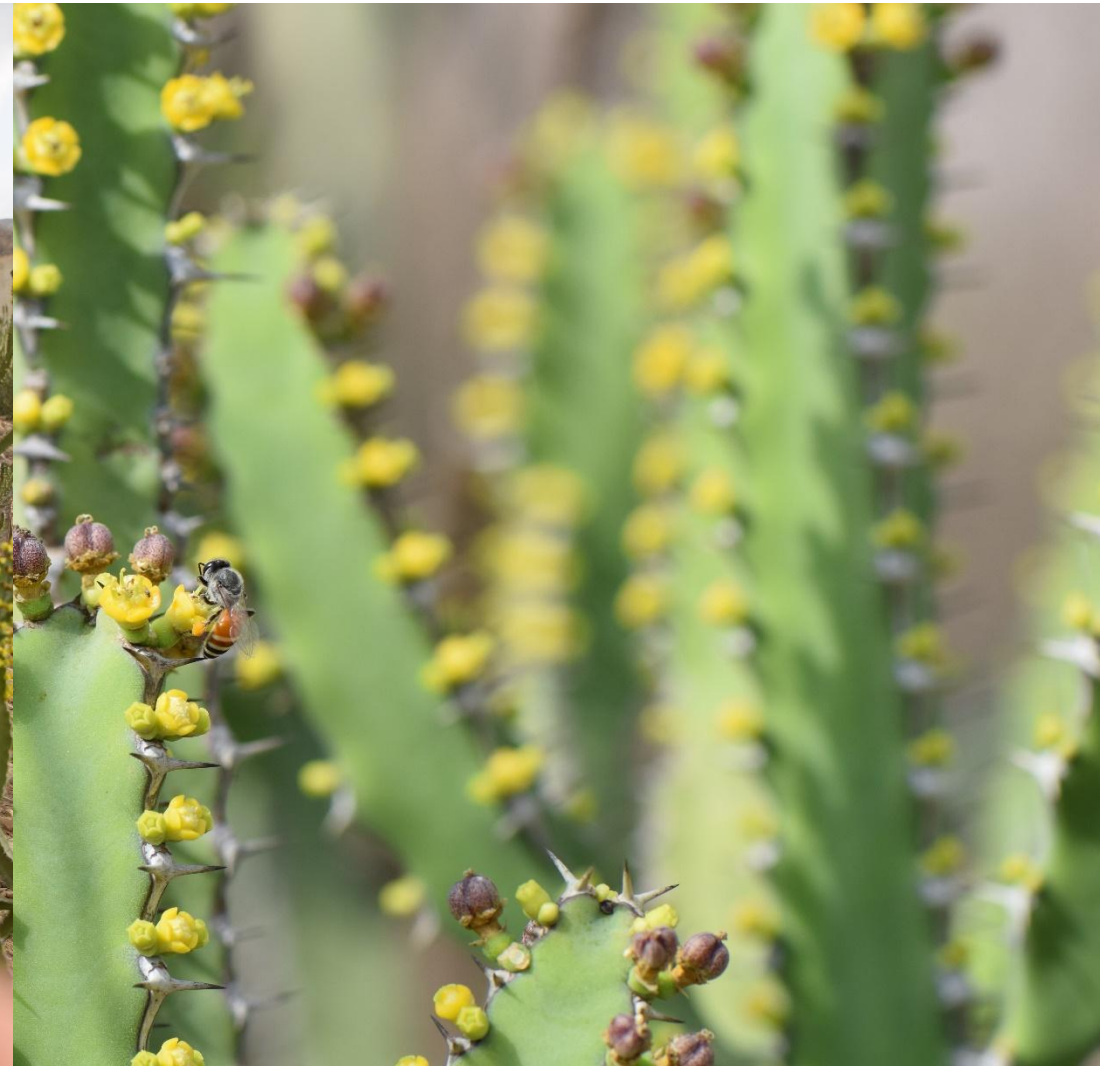



# ***Foeniculum vulgare***

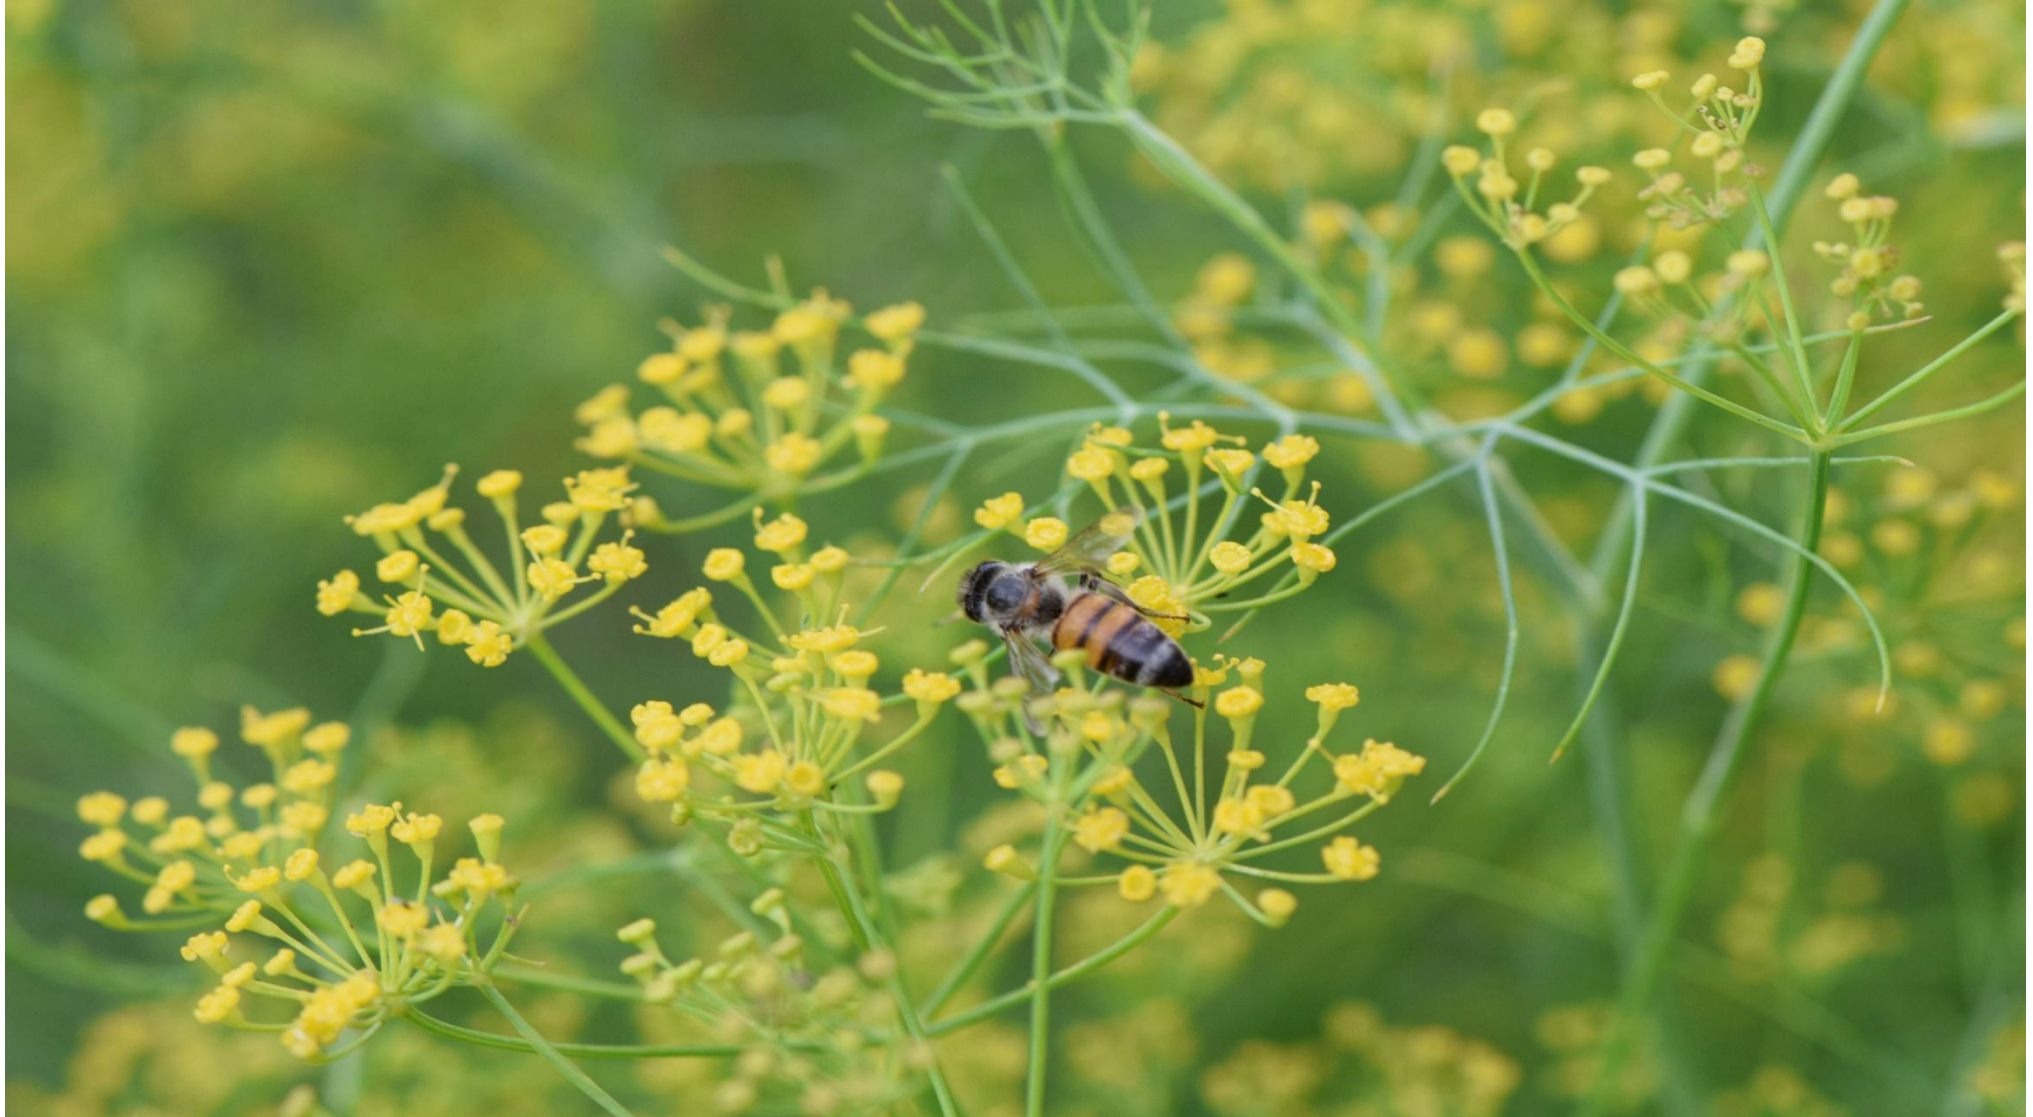



# ***Glinus lotoides* var. *virens***

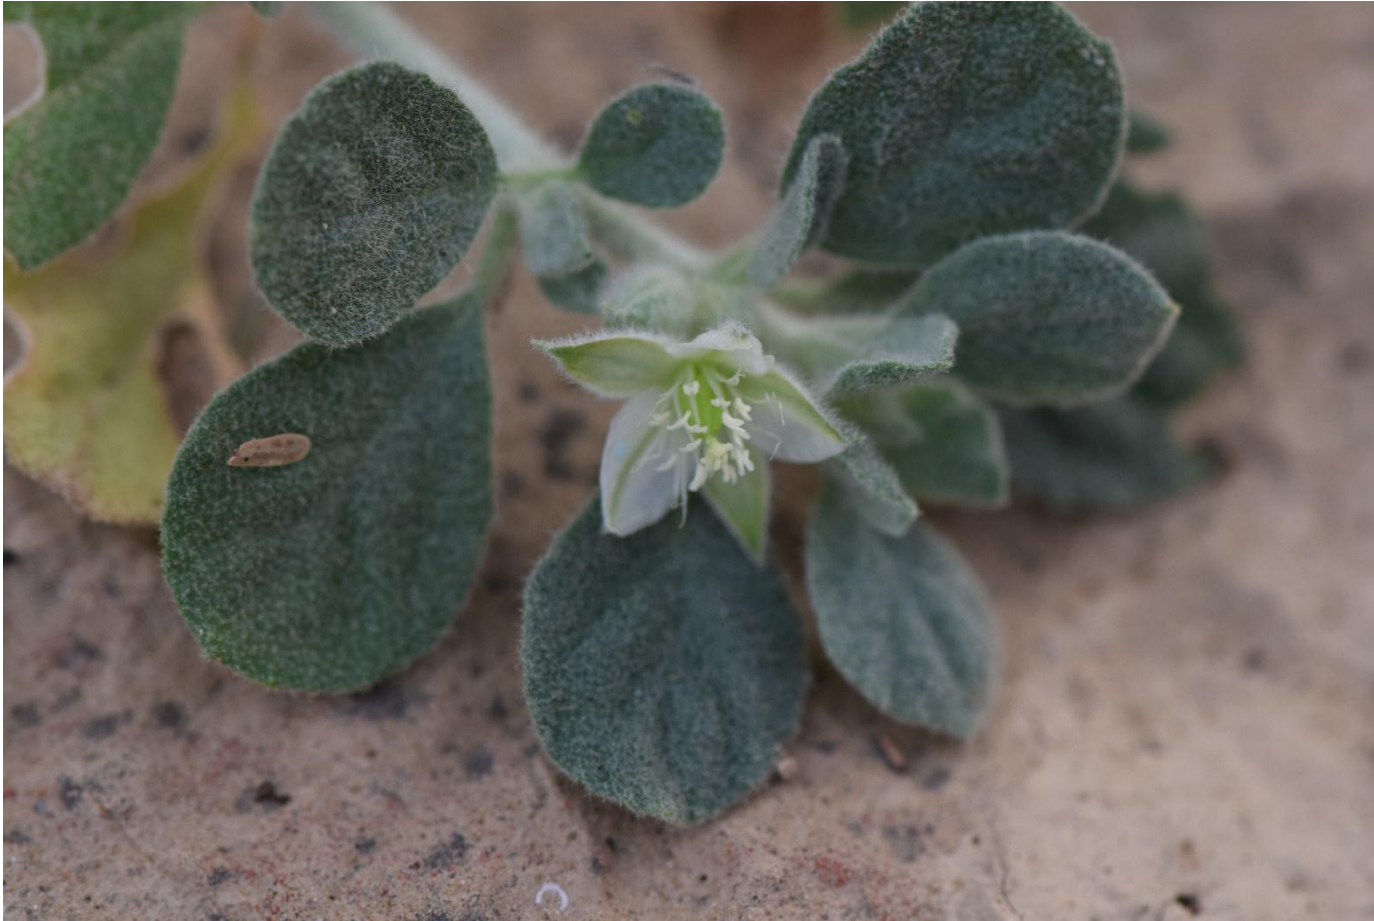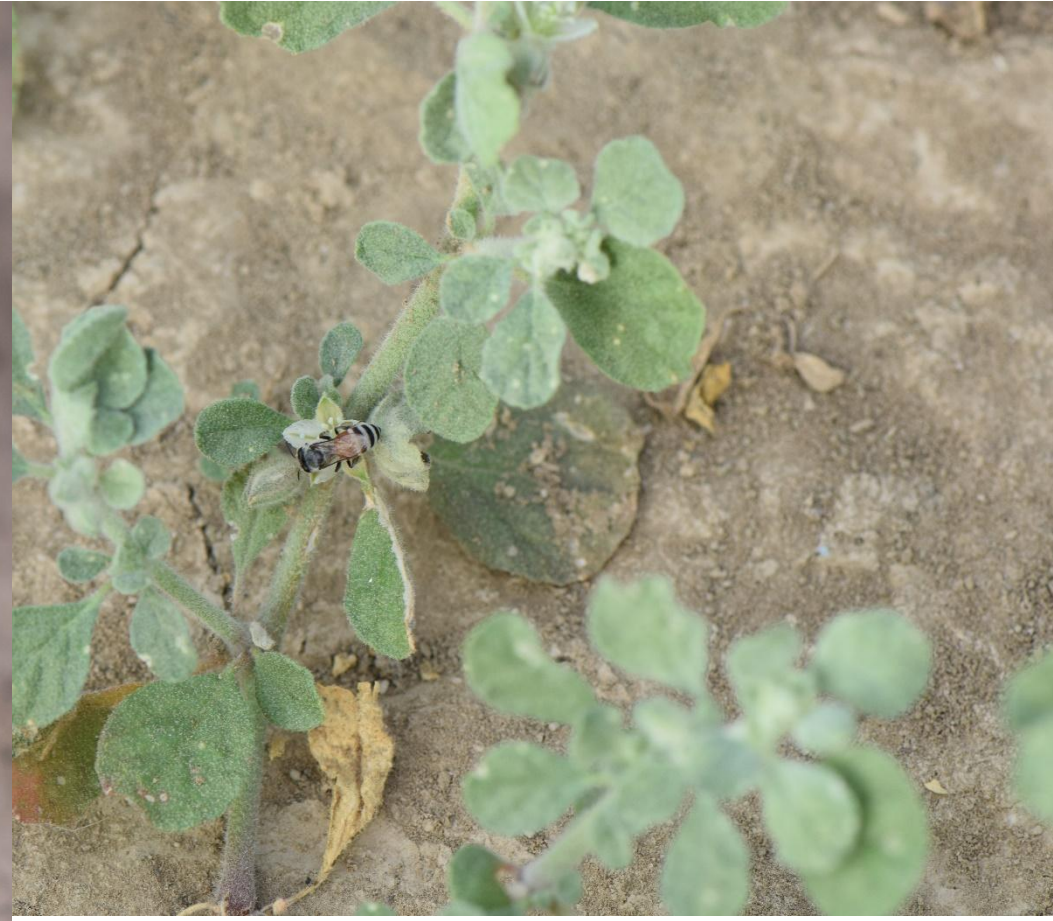



# *Grewia tenax*

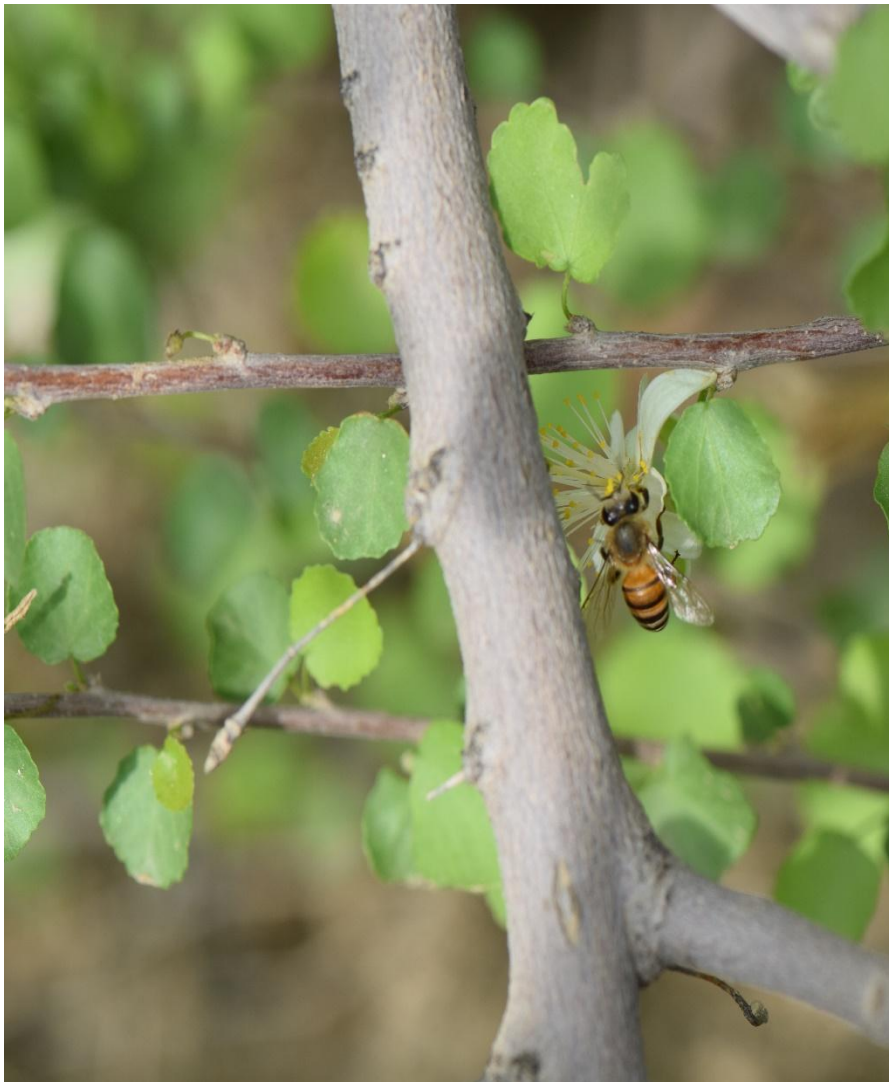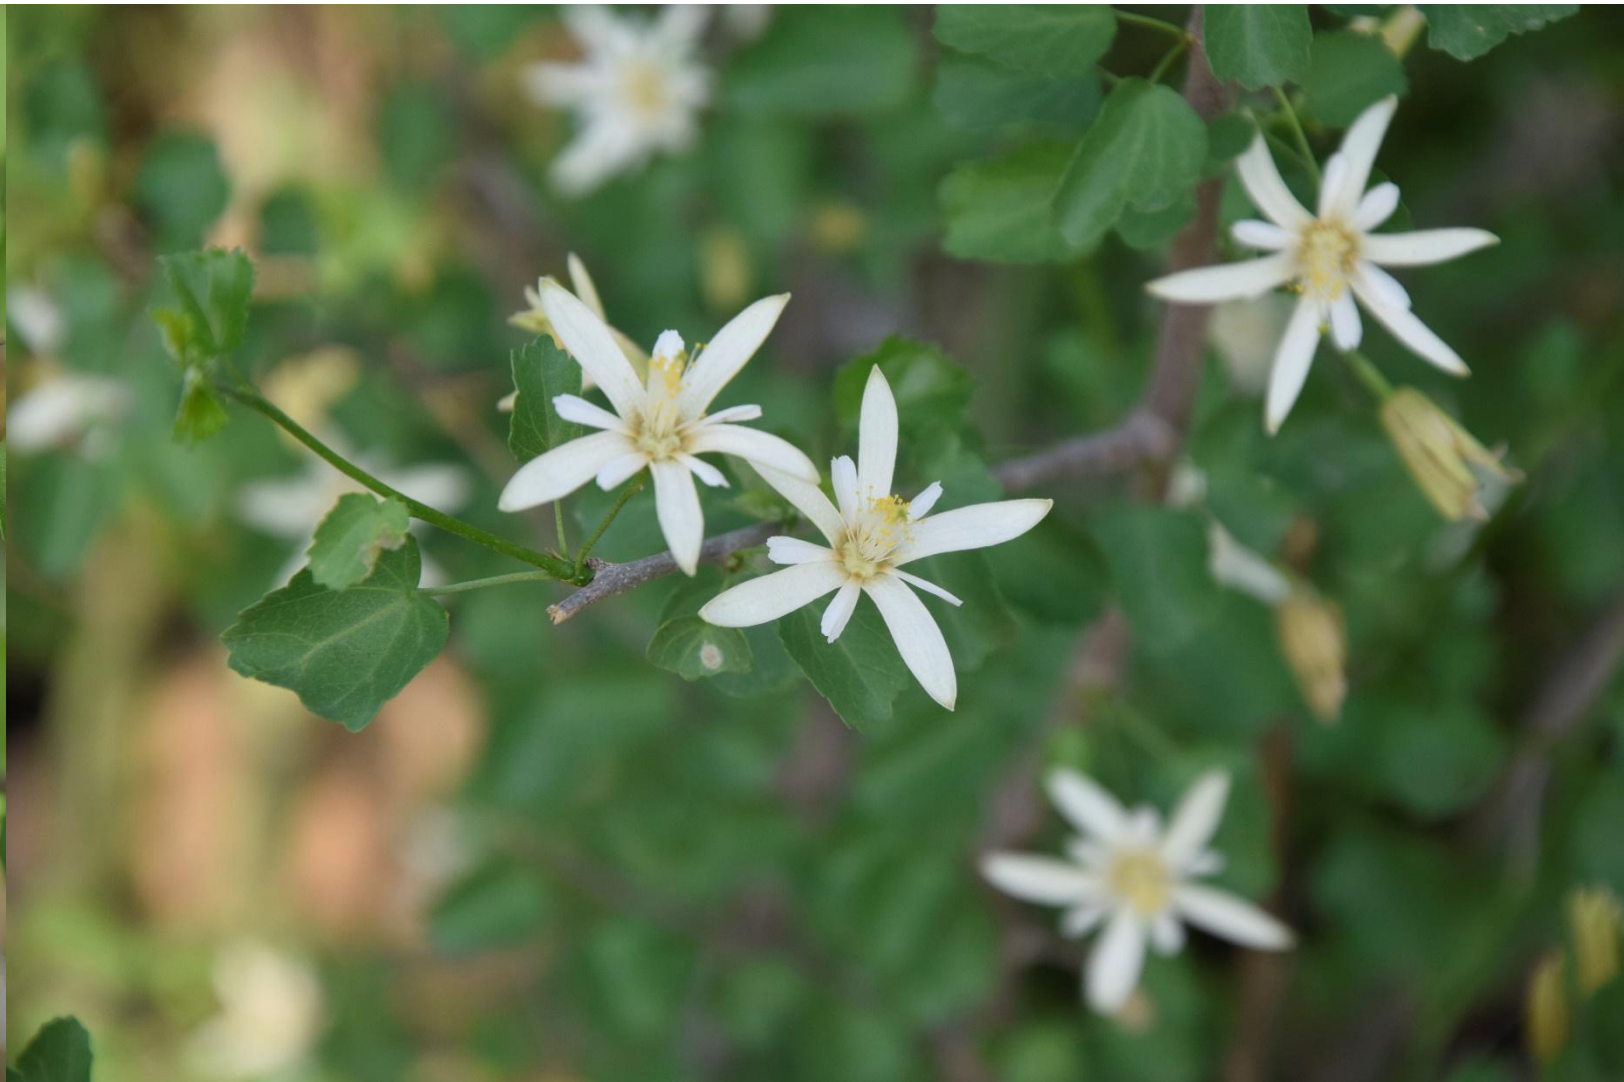



# *Heliotropium arbainens*

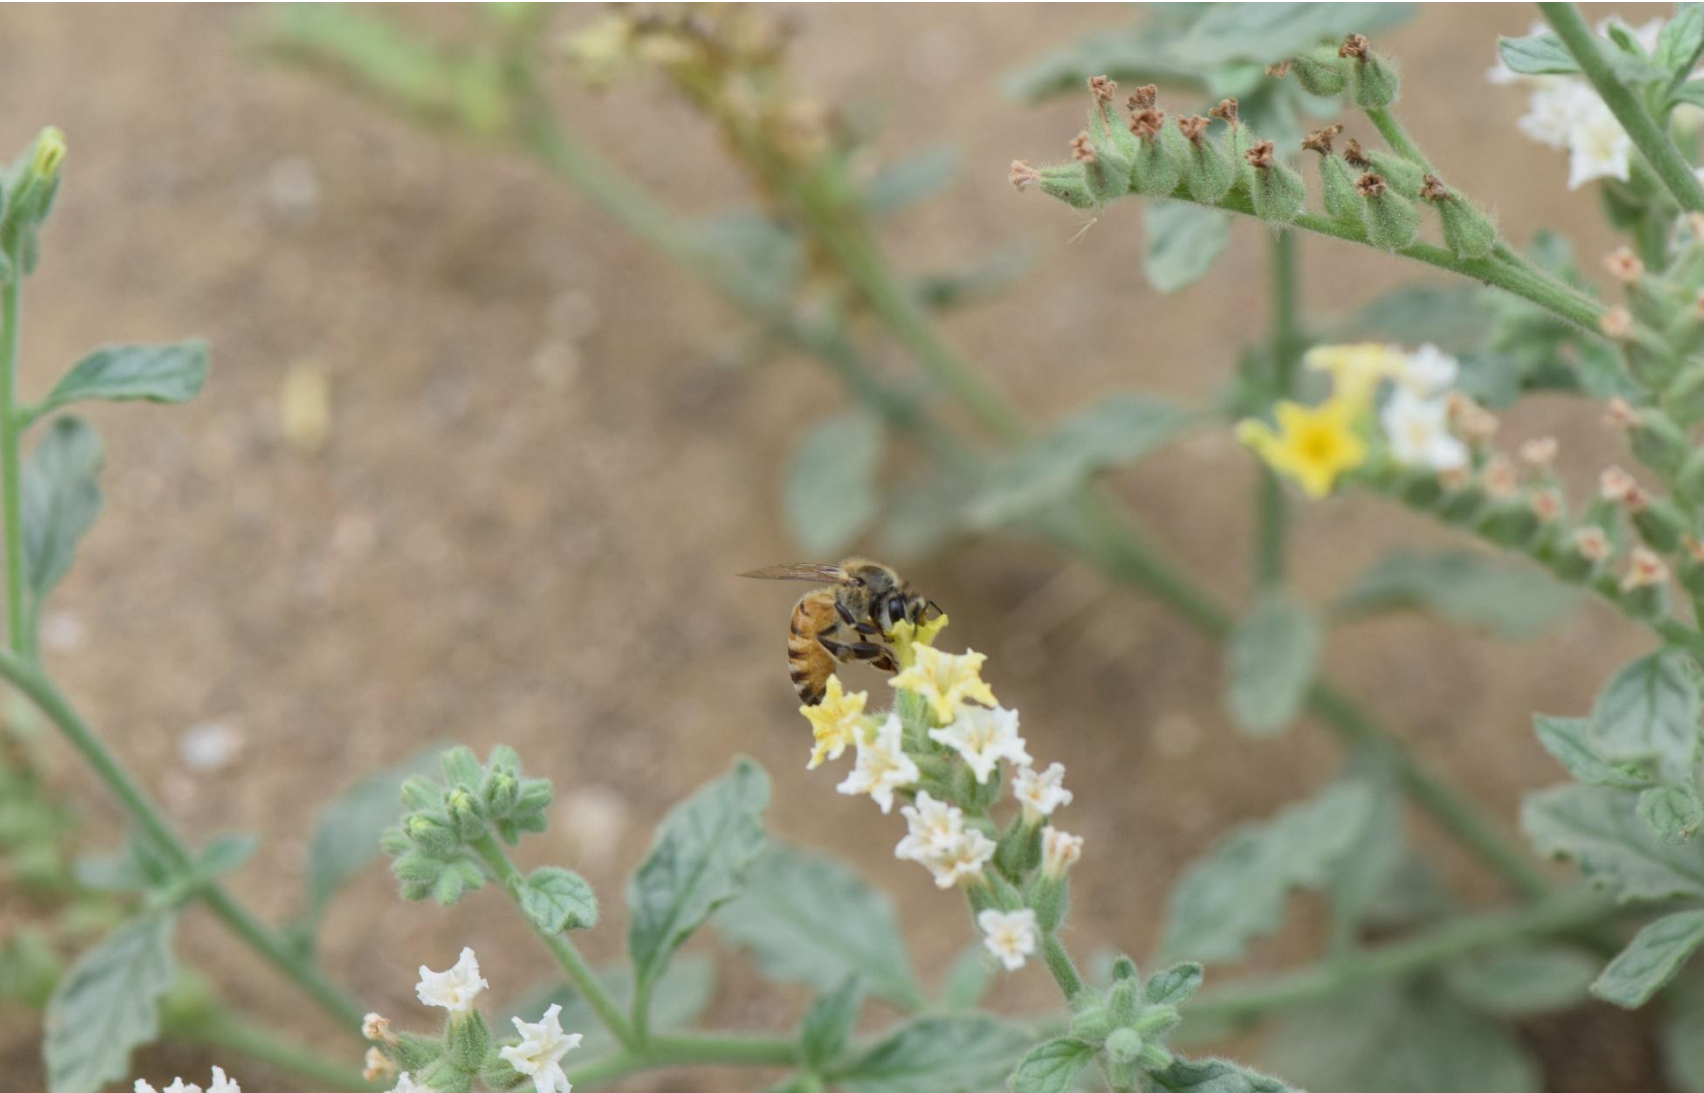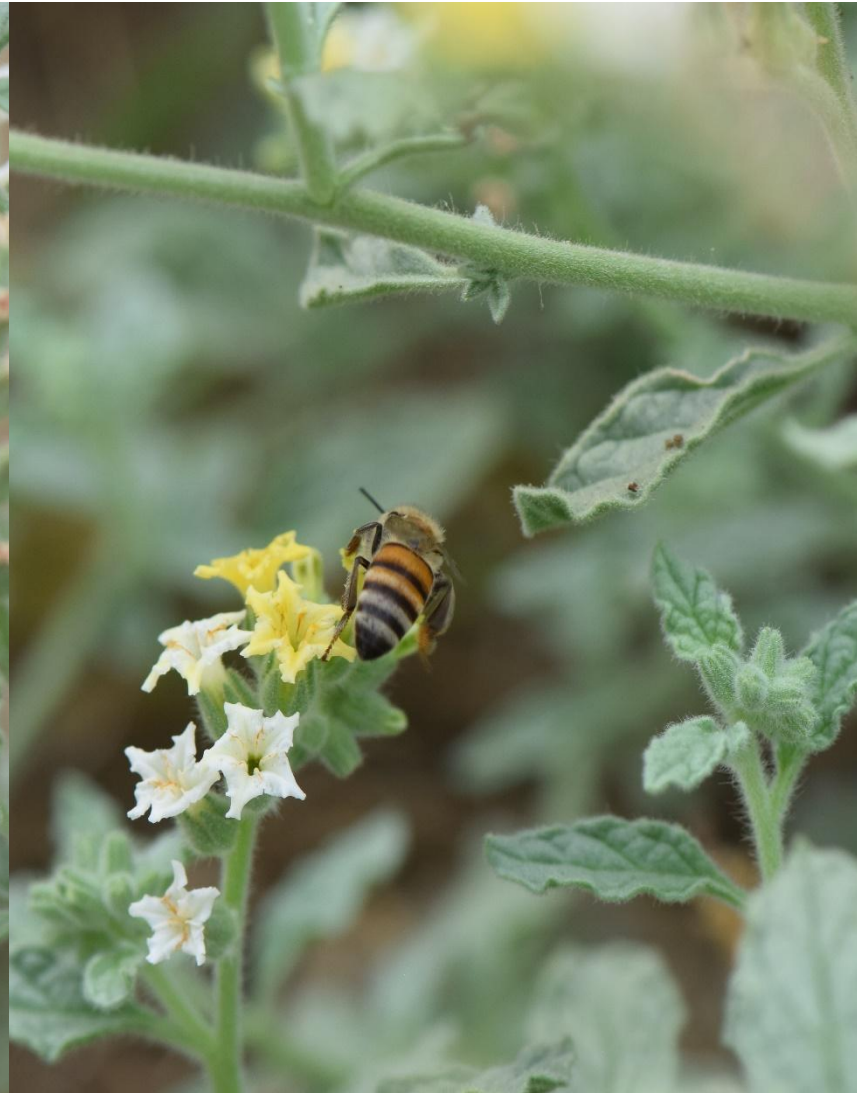



# ***Heliotropium pterocarpum***

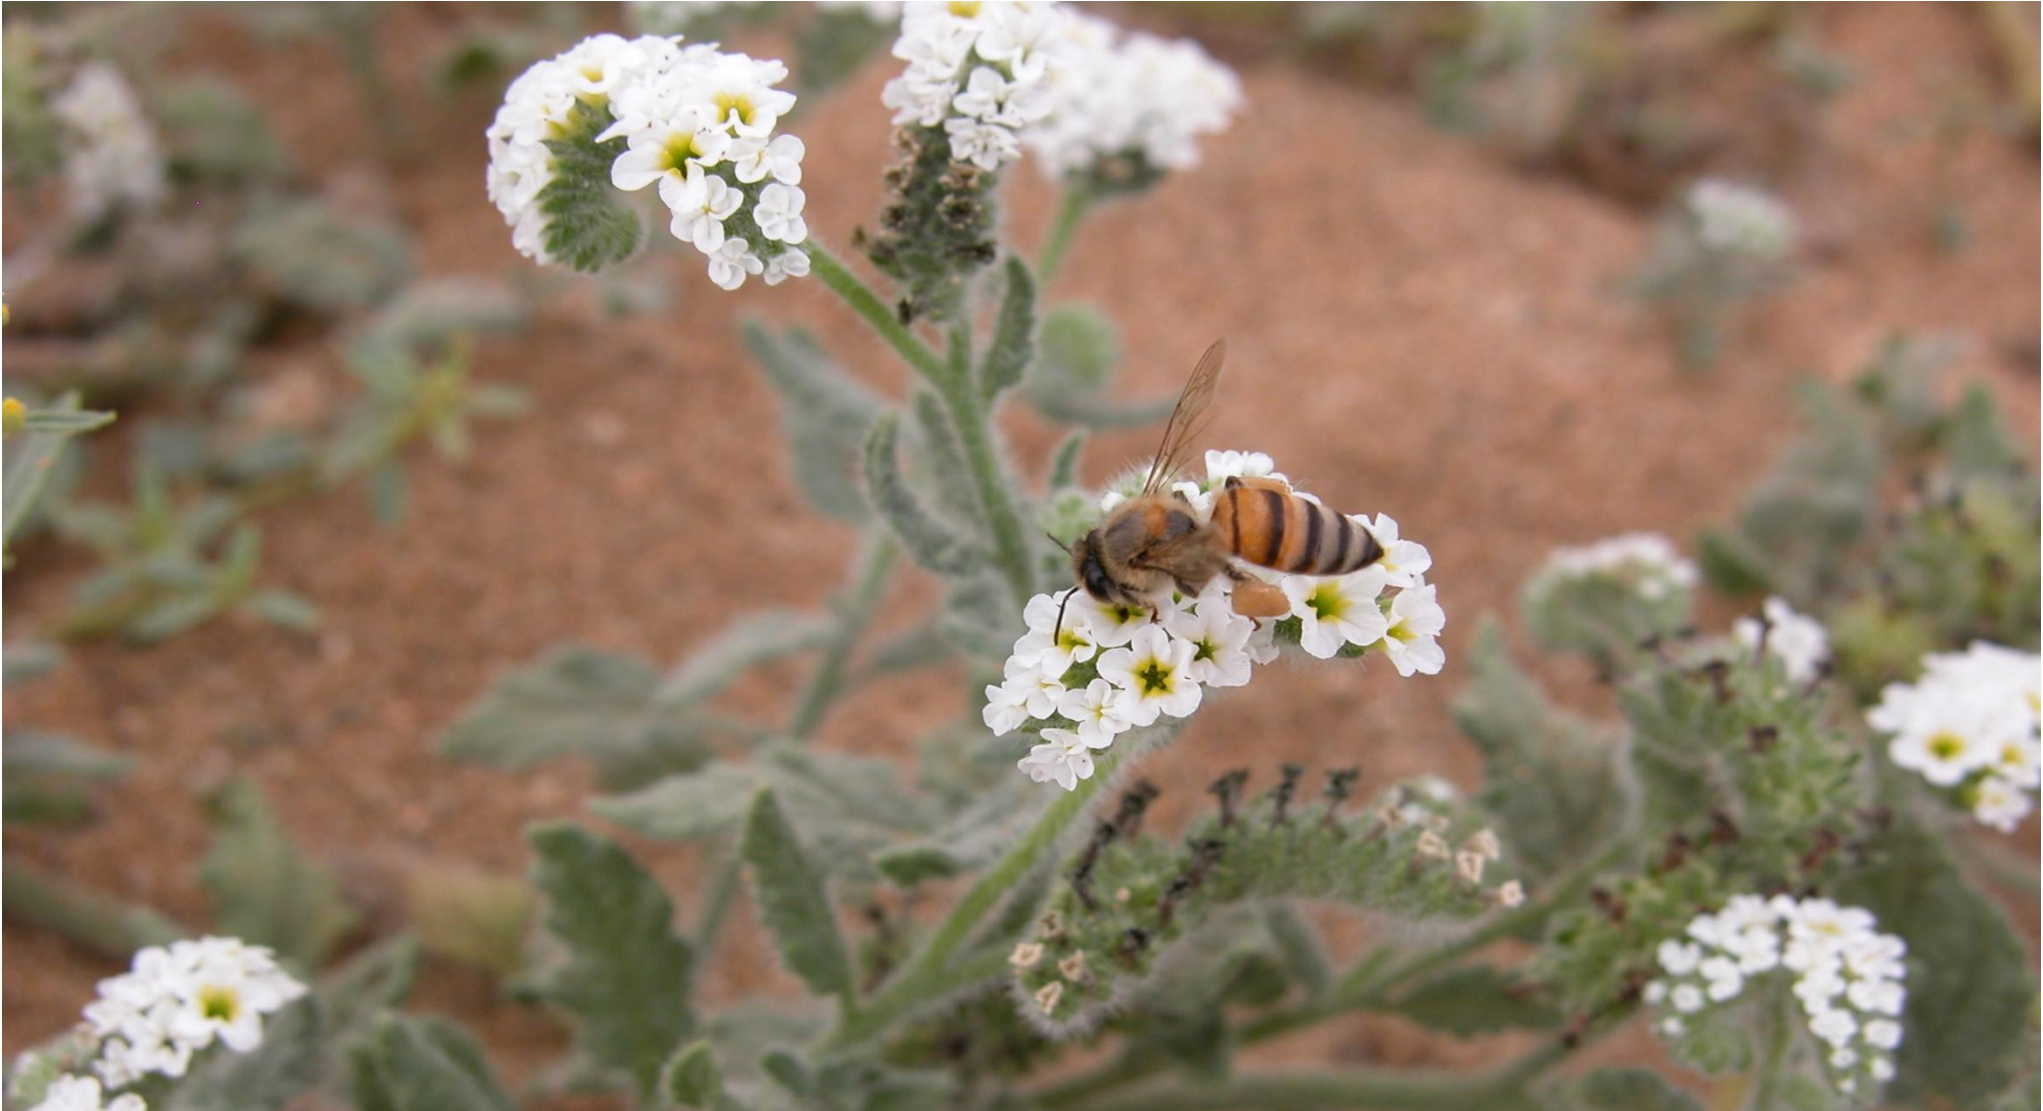



# *Hypoestes forskalii*

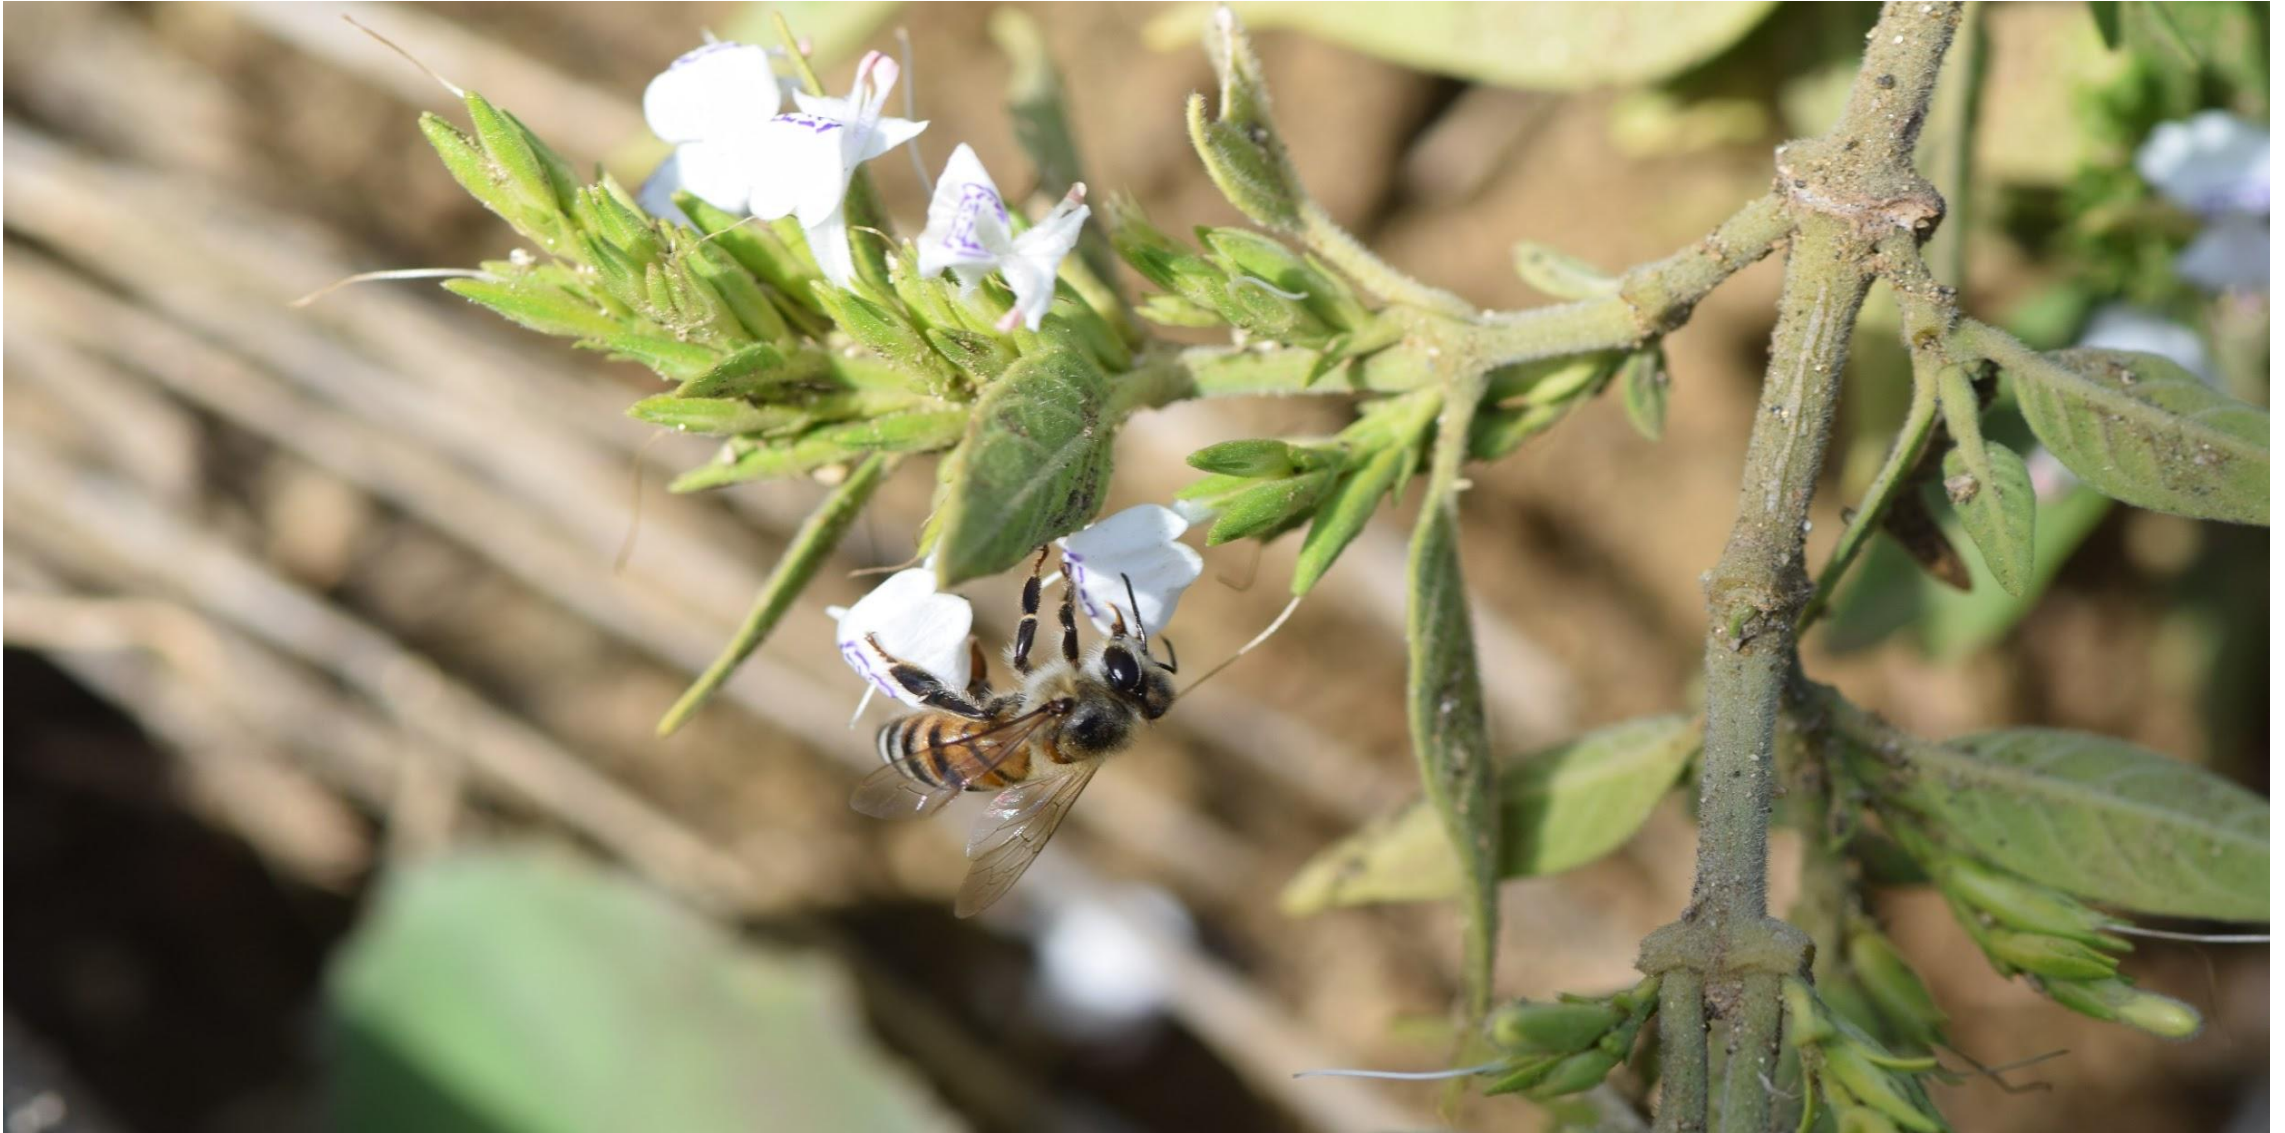



# *Justicia flava*

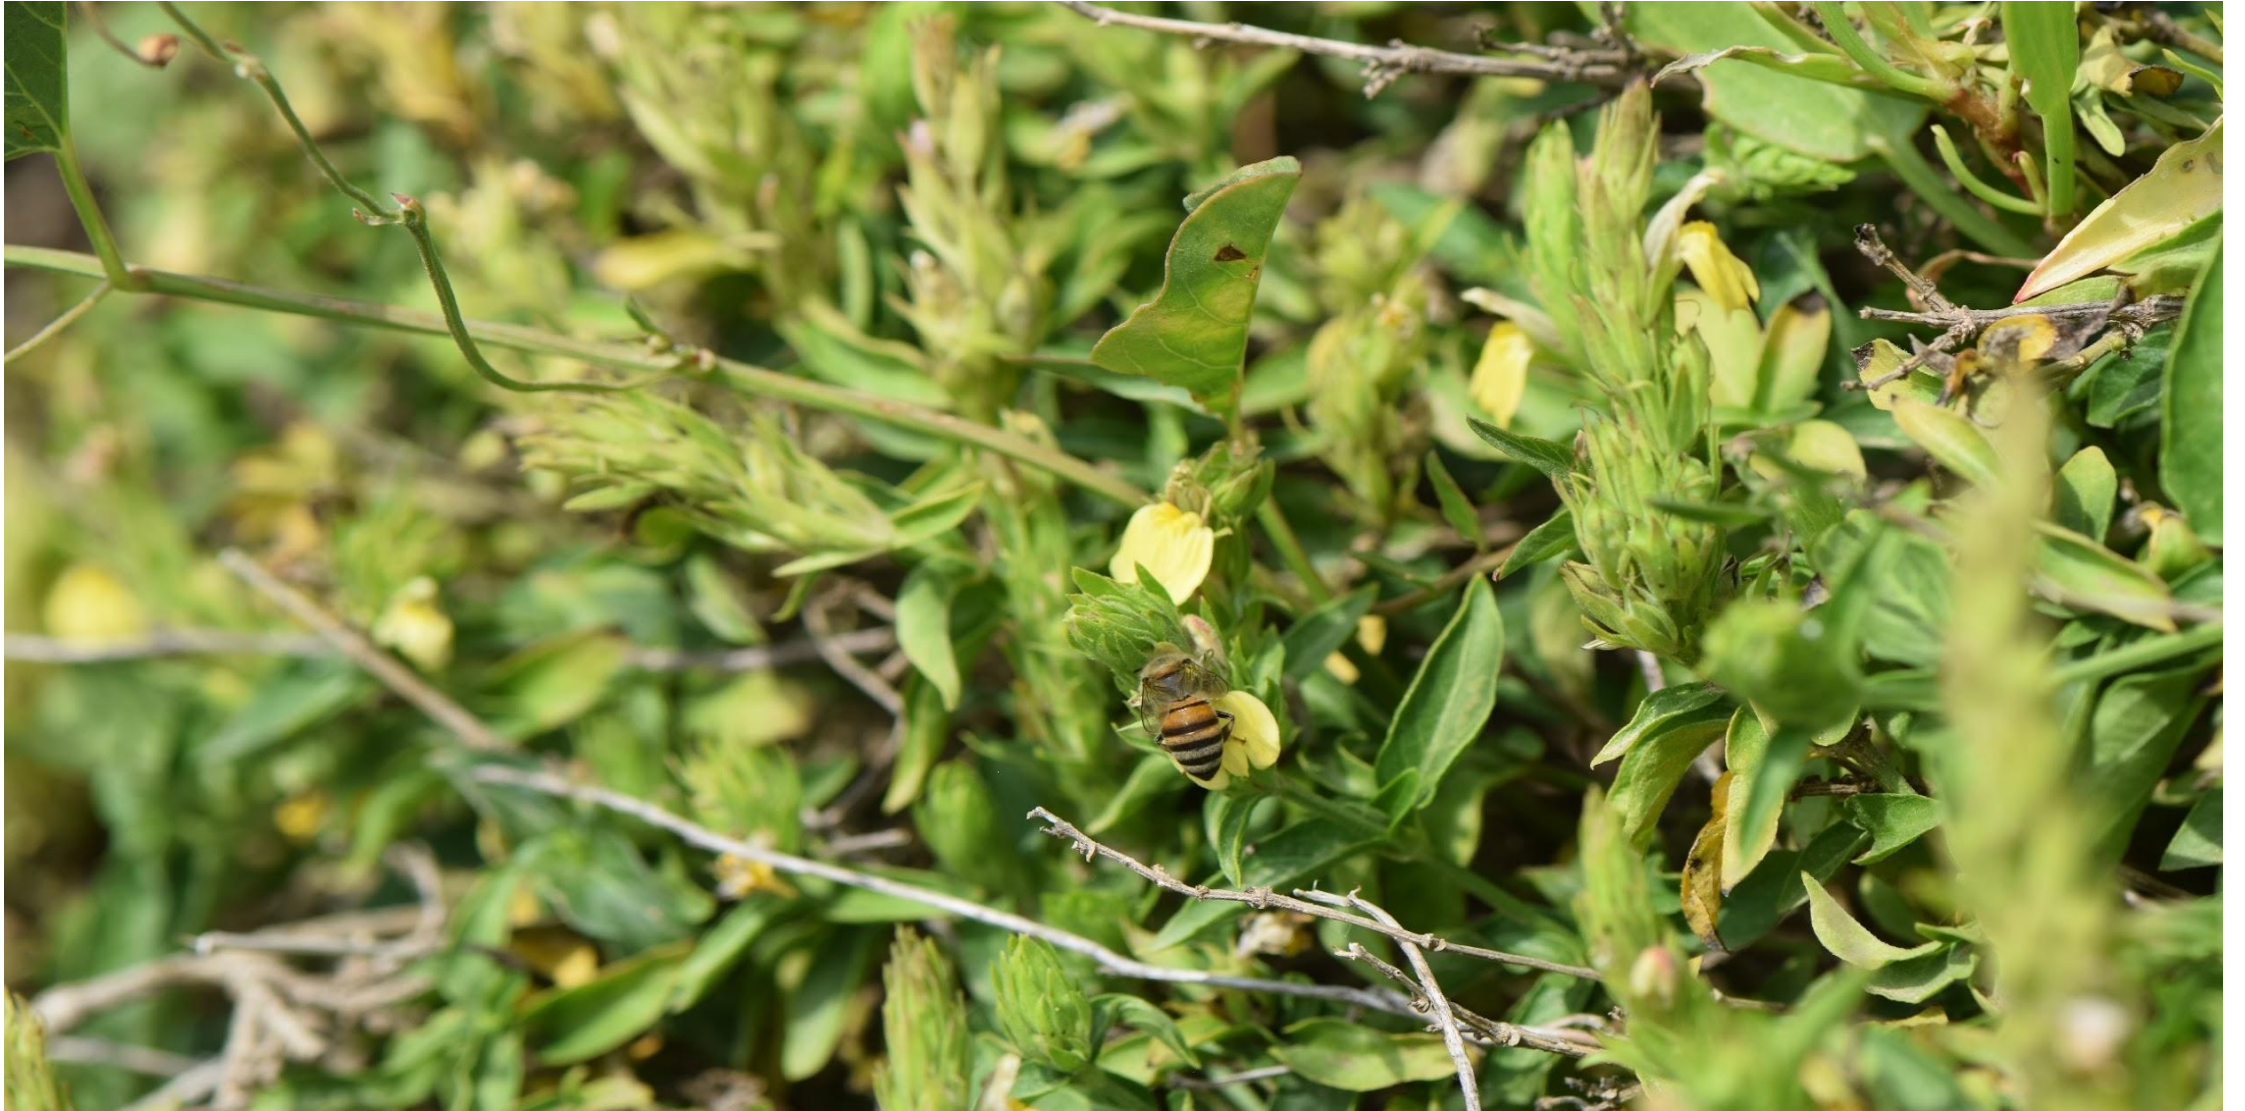



# ***Lactuca serriola***

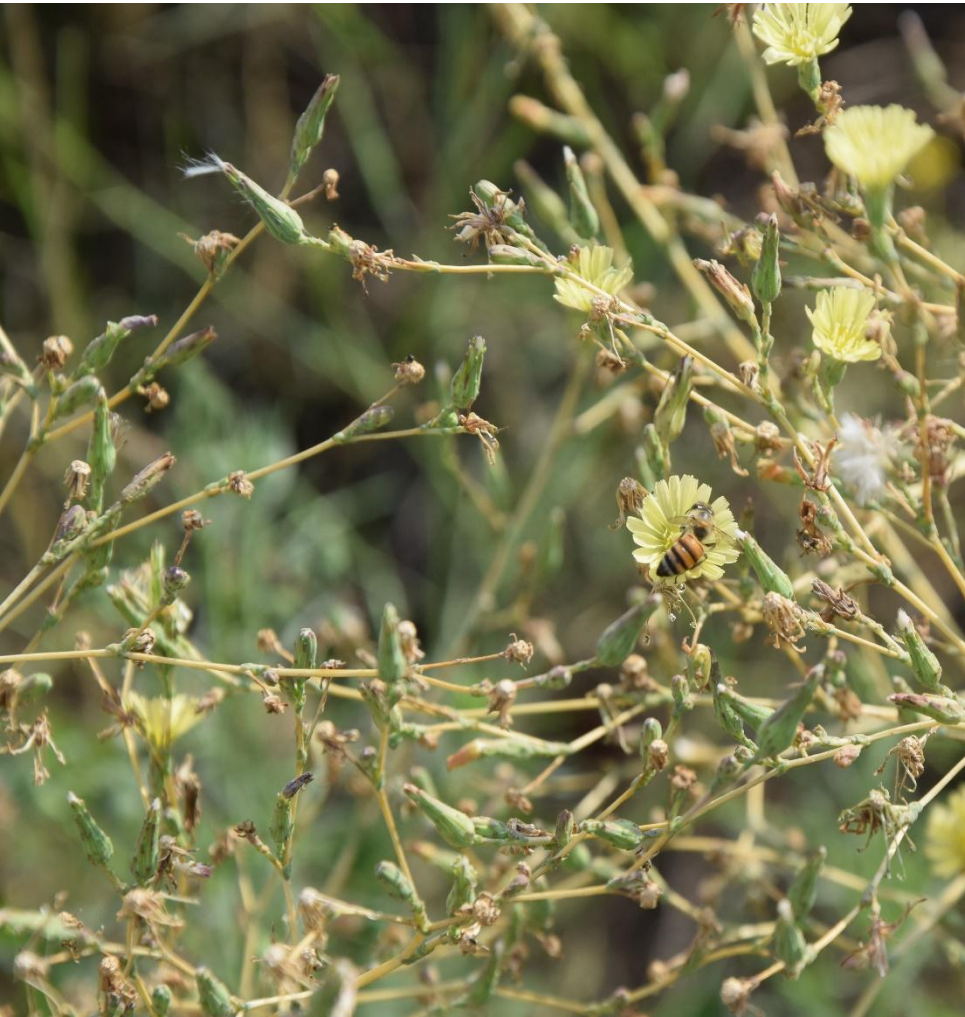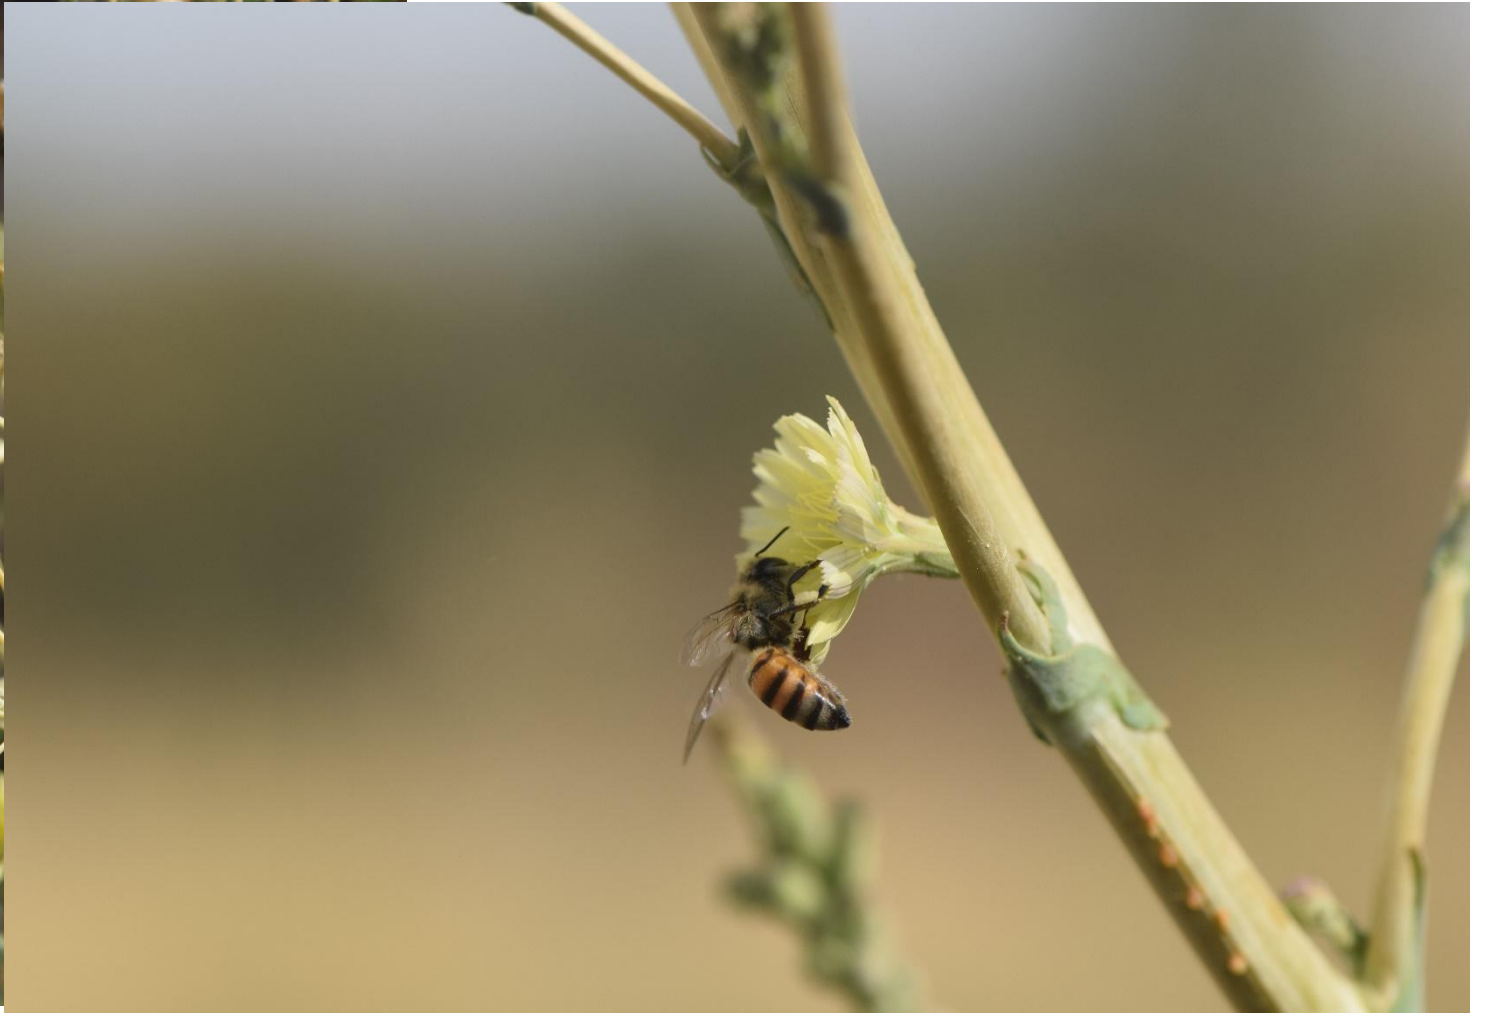



# ***Lavandula dentate***

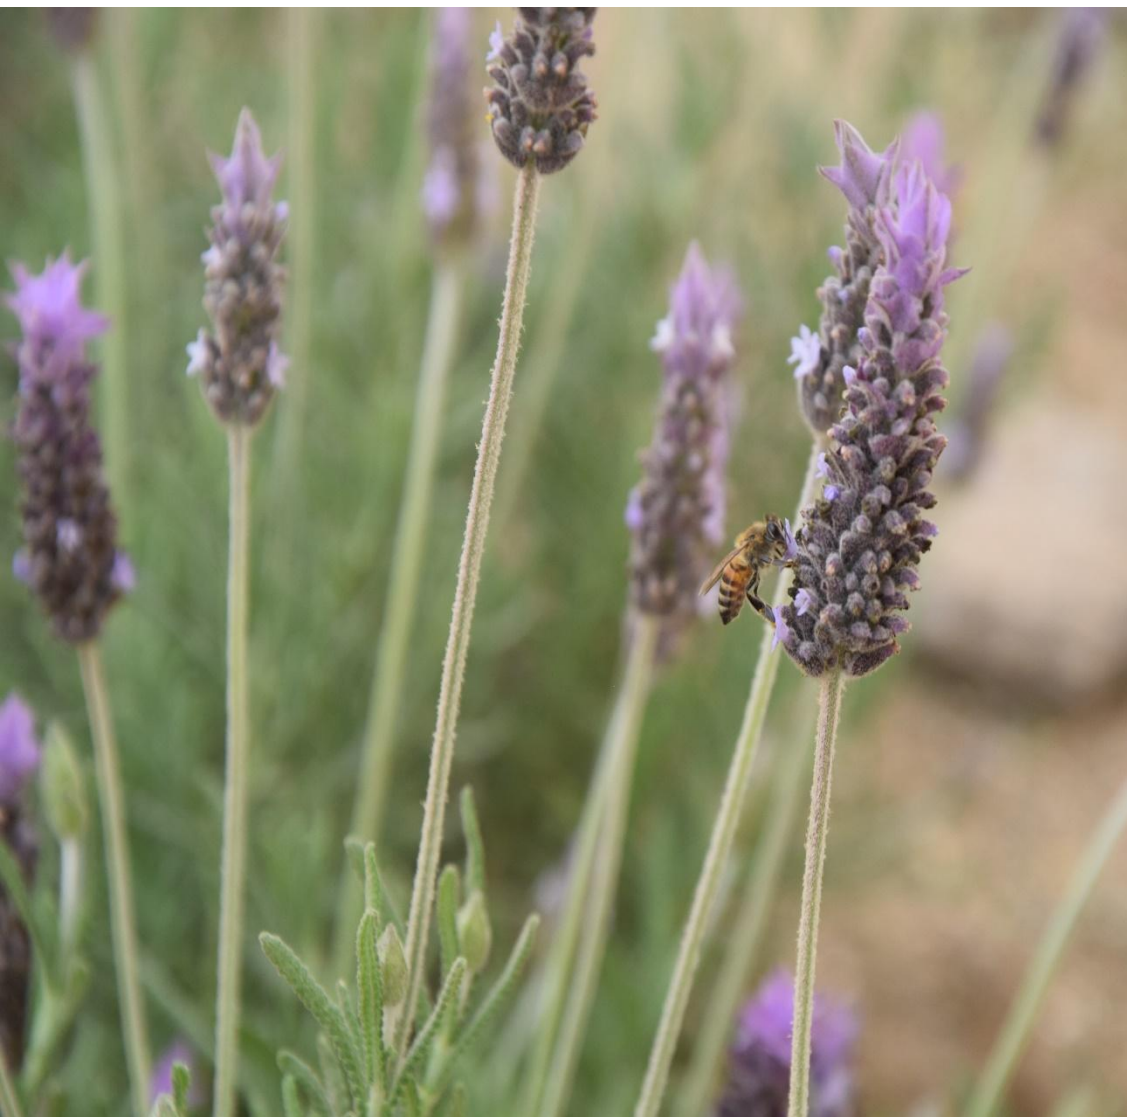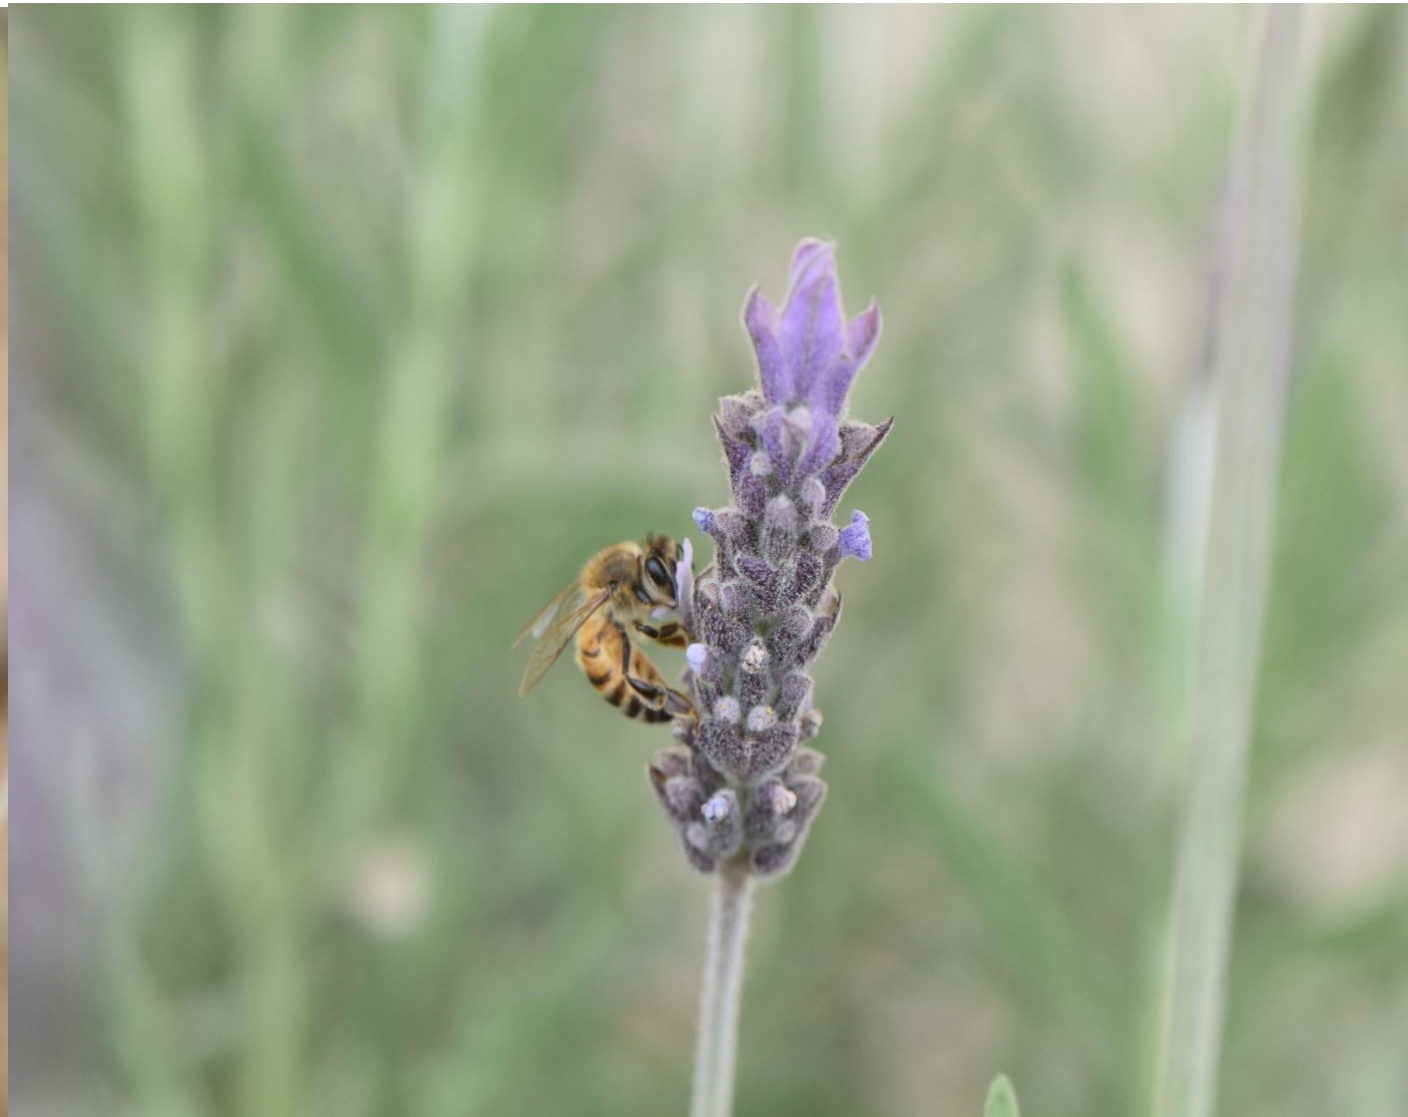



# *Lavandula pubescens*

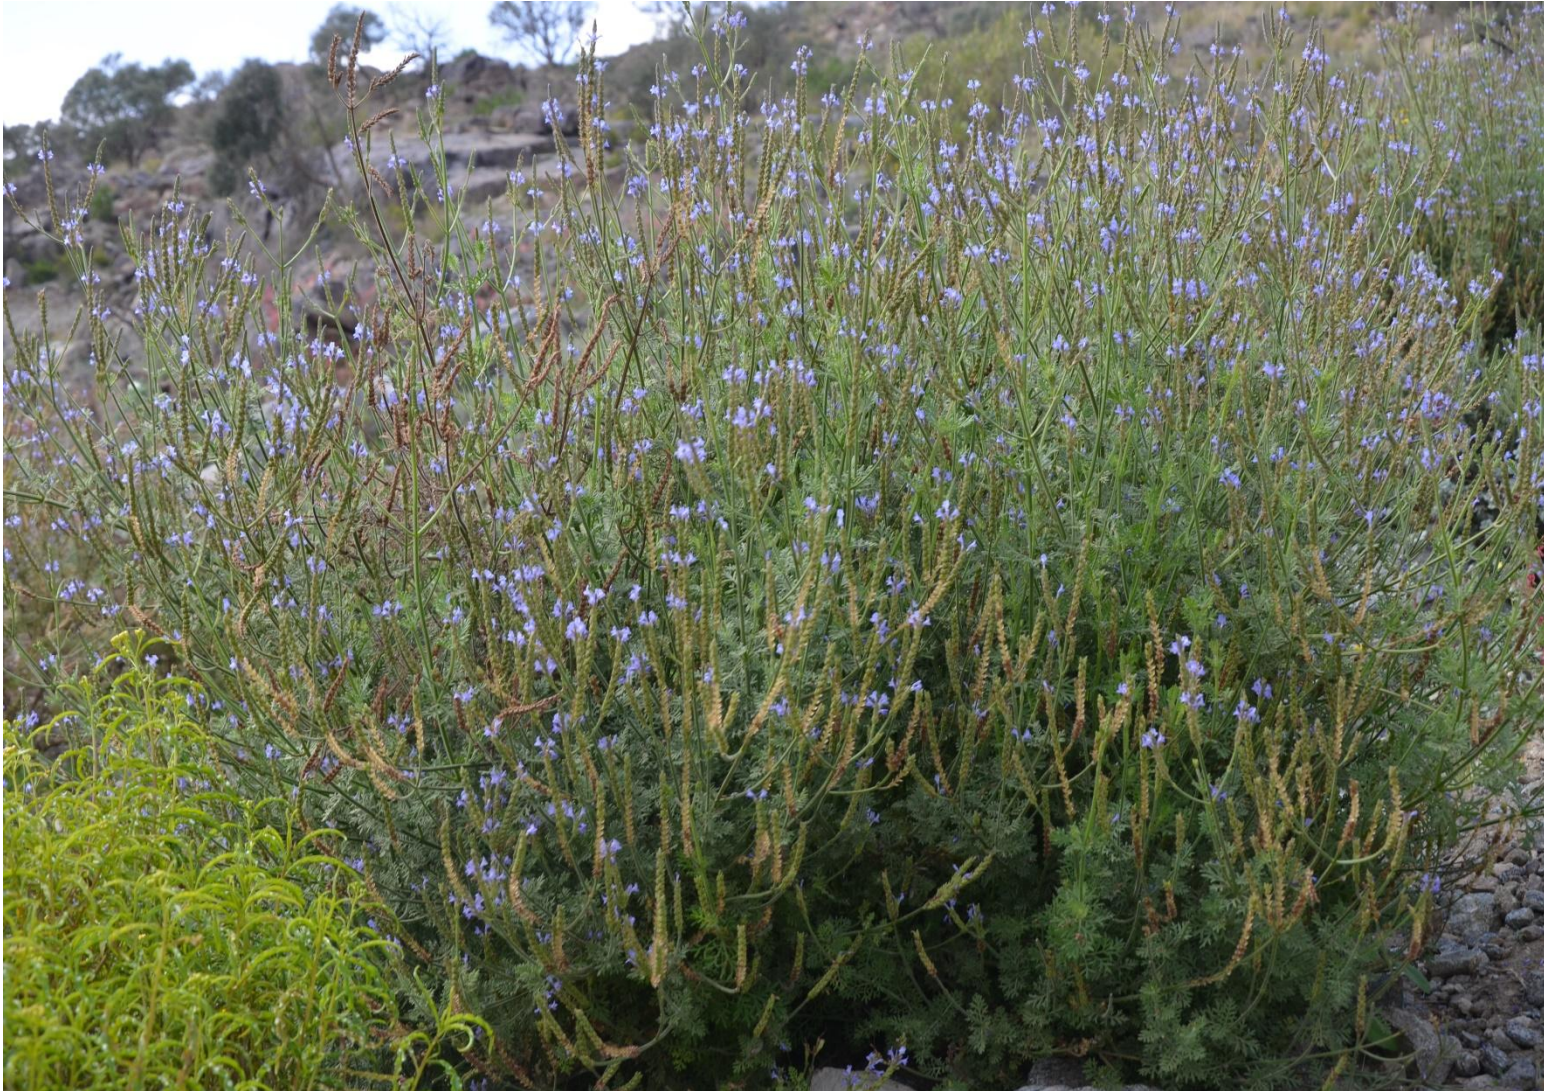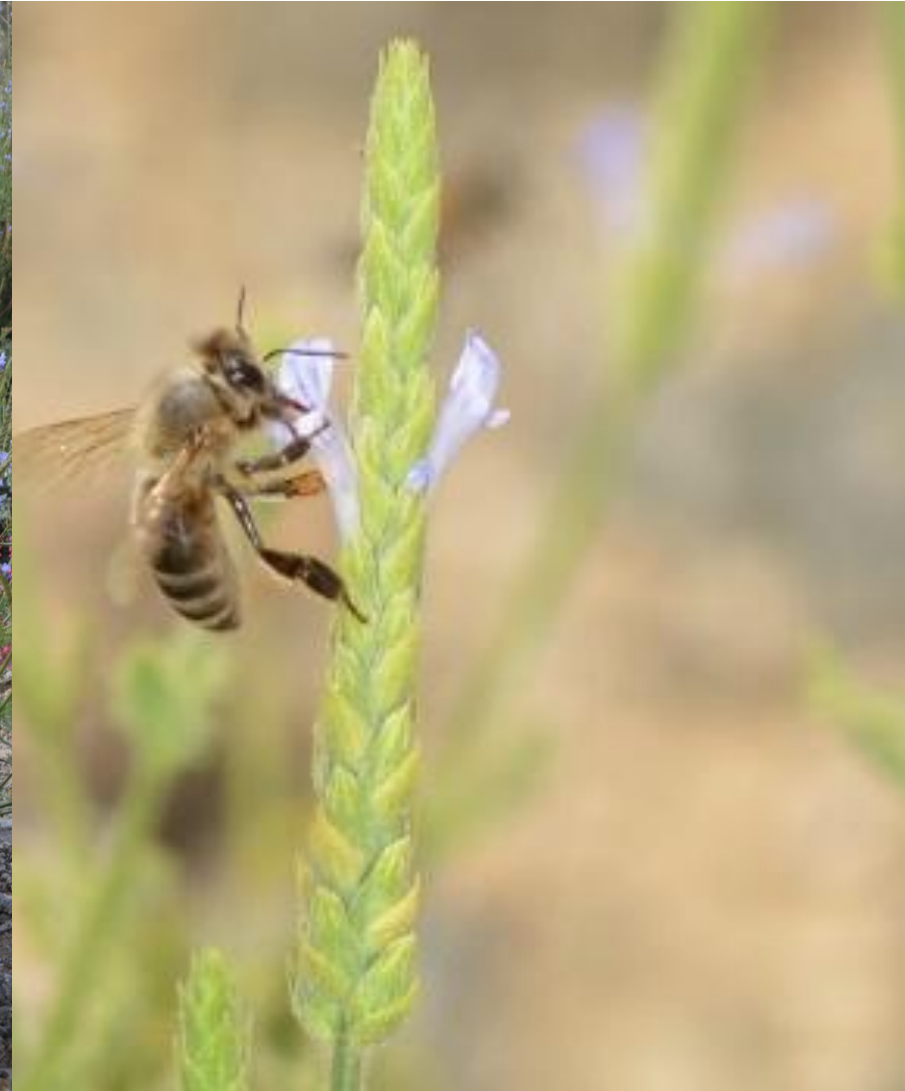



# *Leptadenia pyrotechnica*

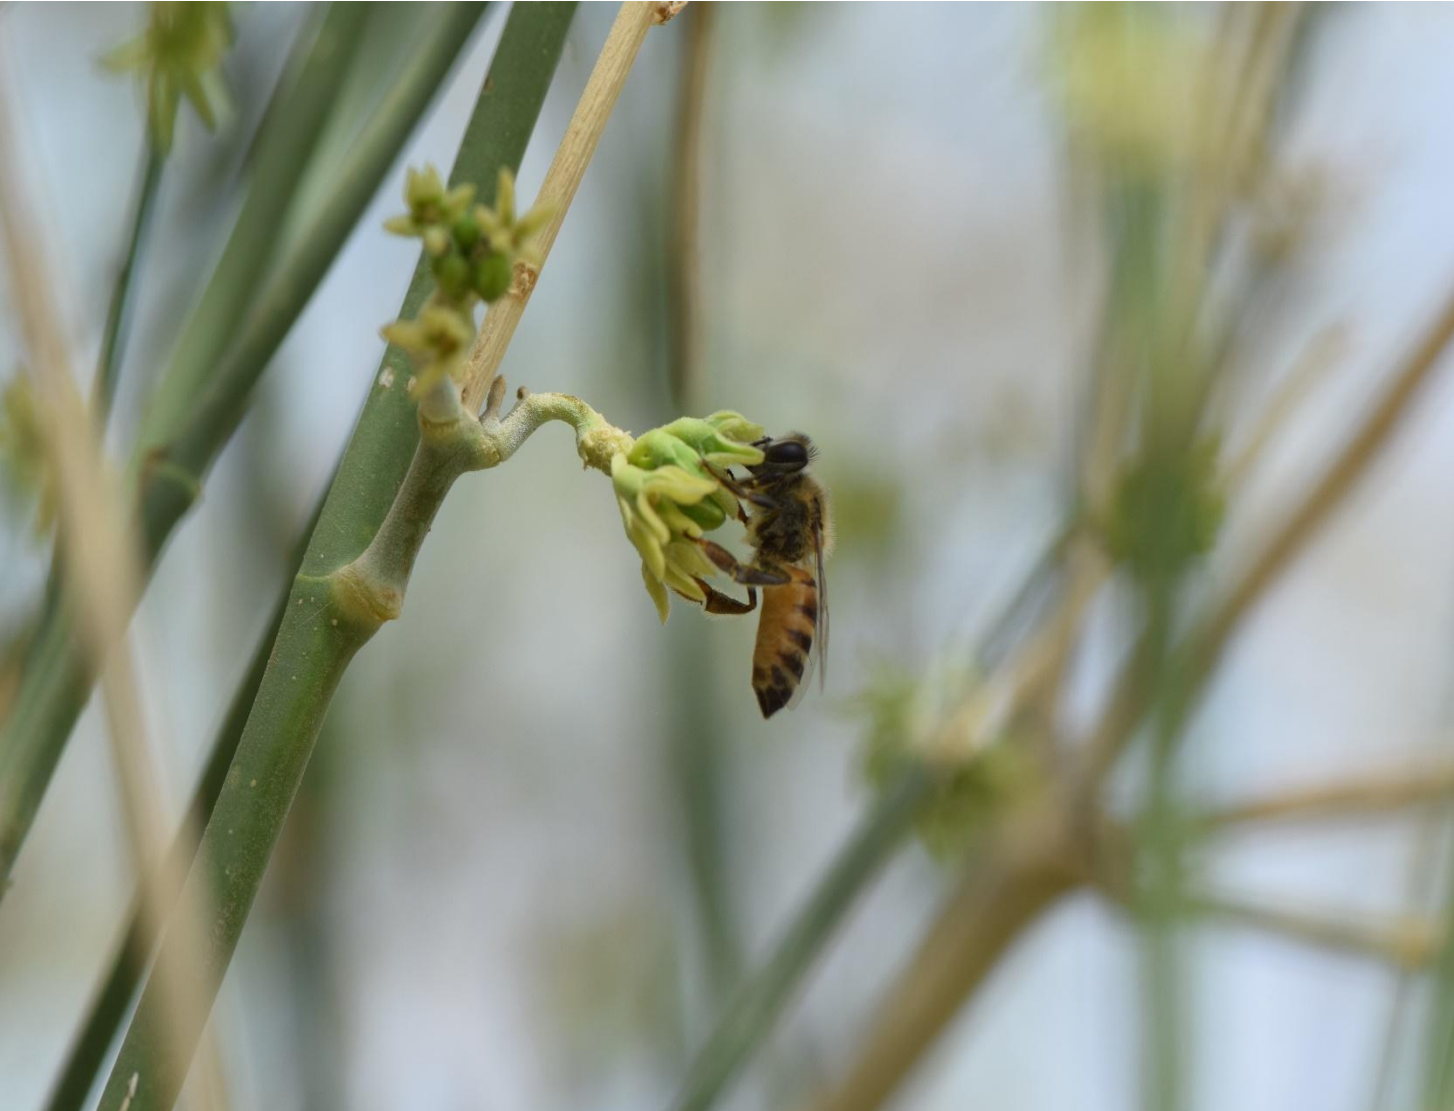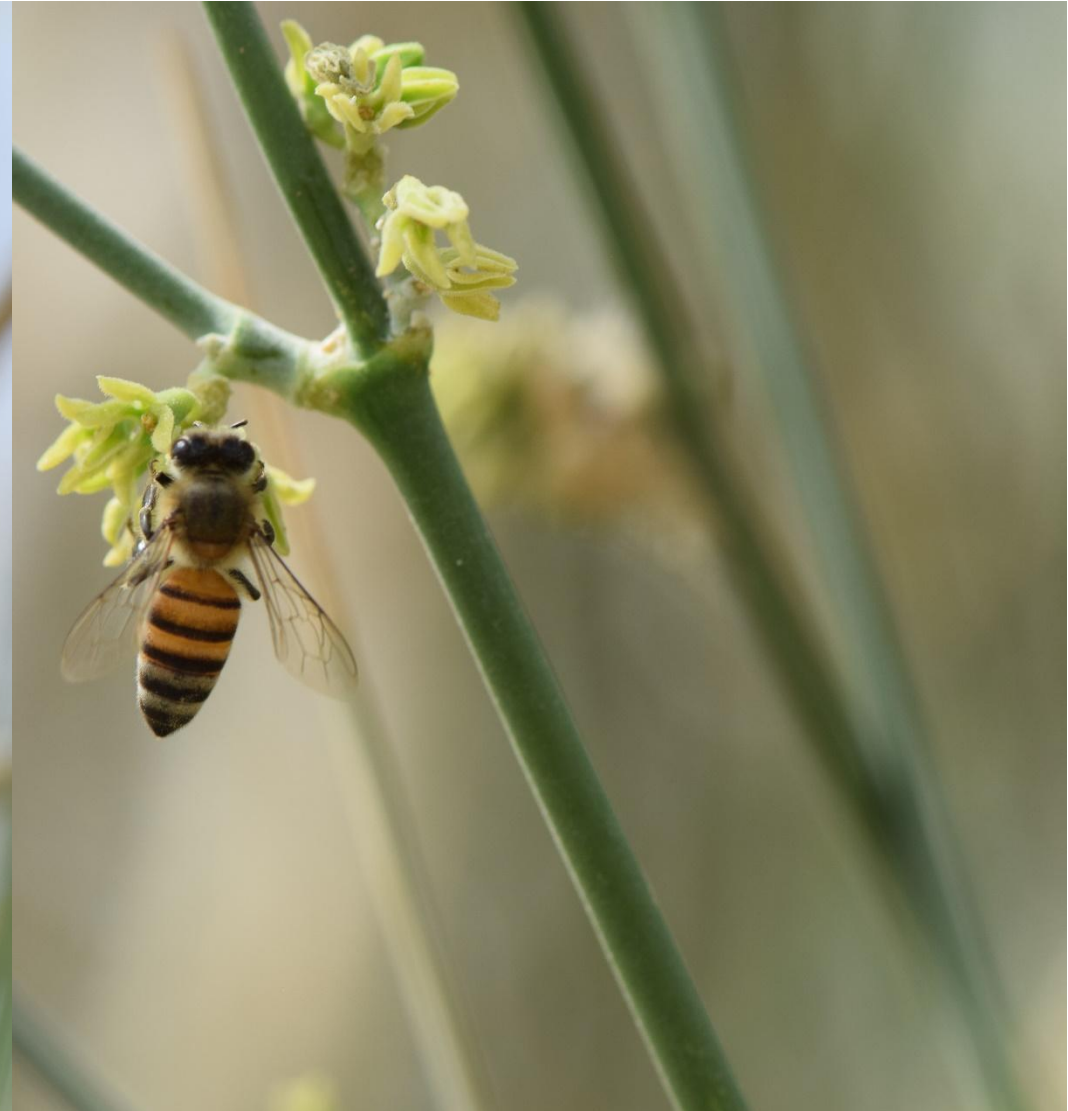



# *Lotus quinatus*

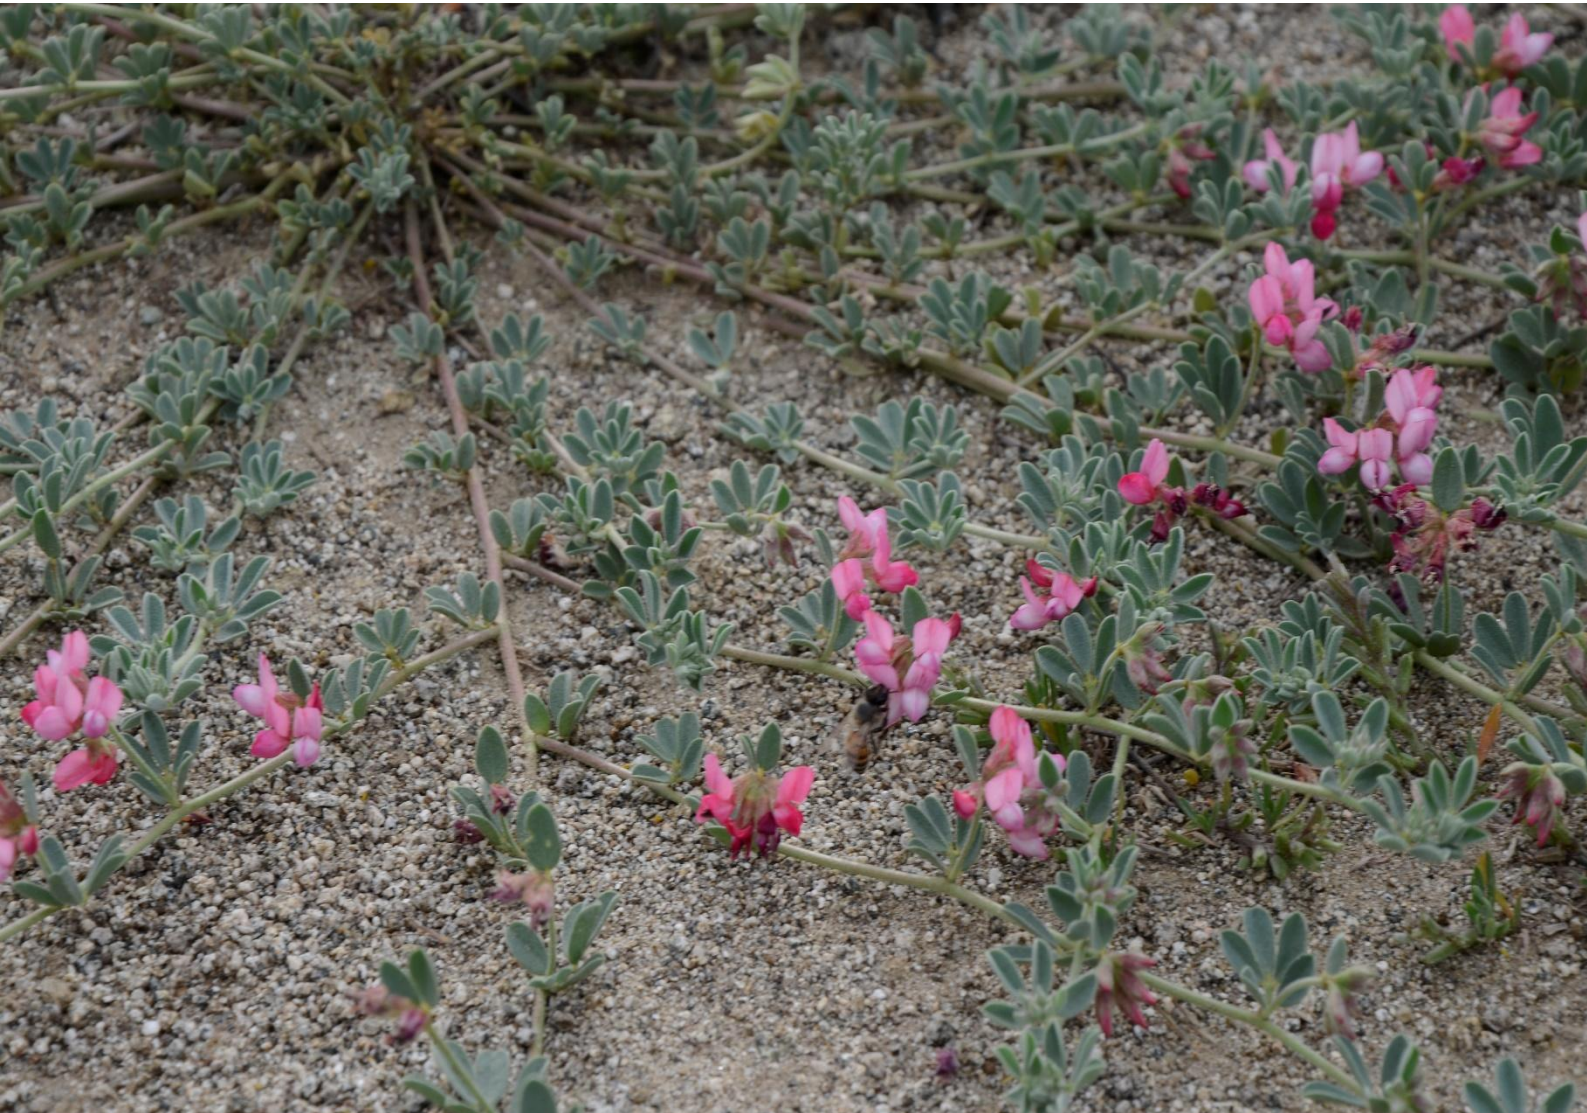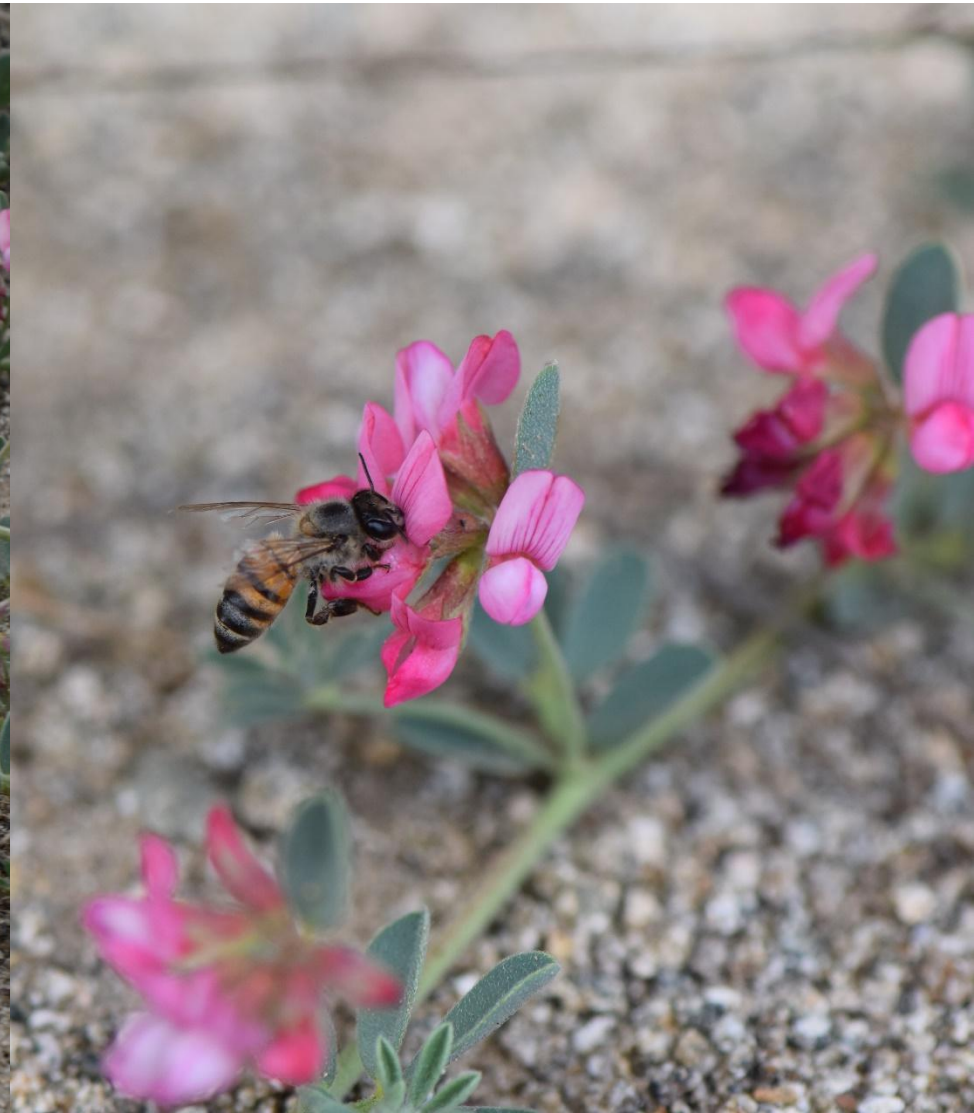



# *Maerue cricifolia*

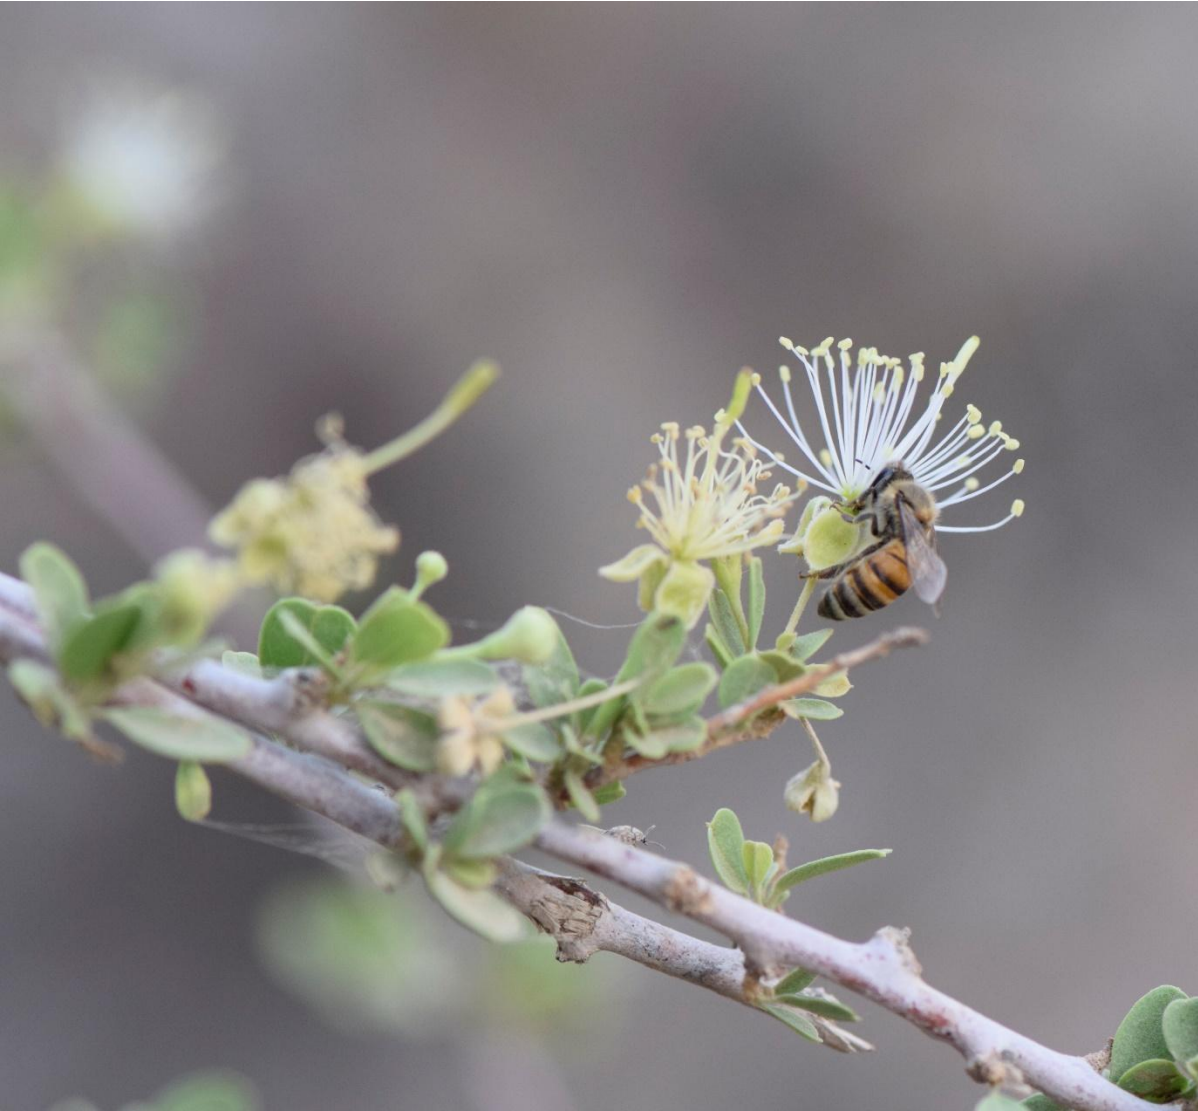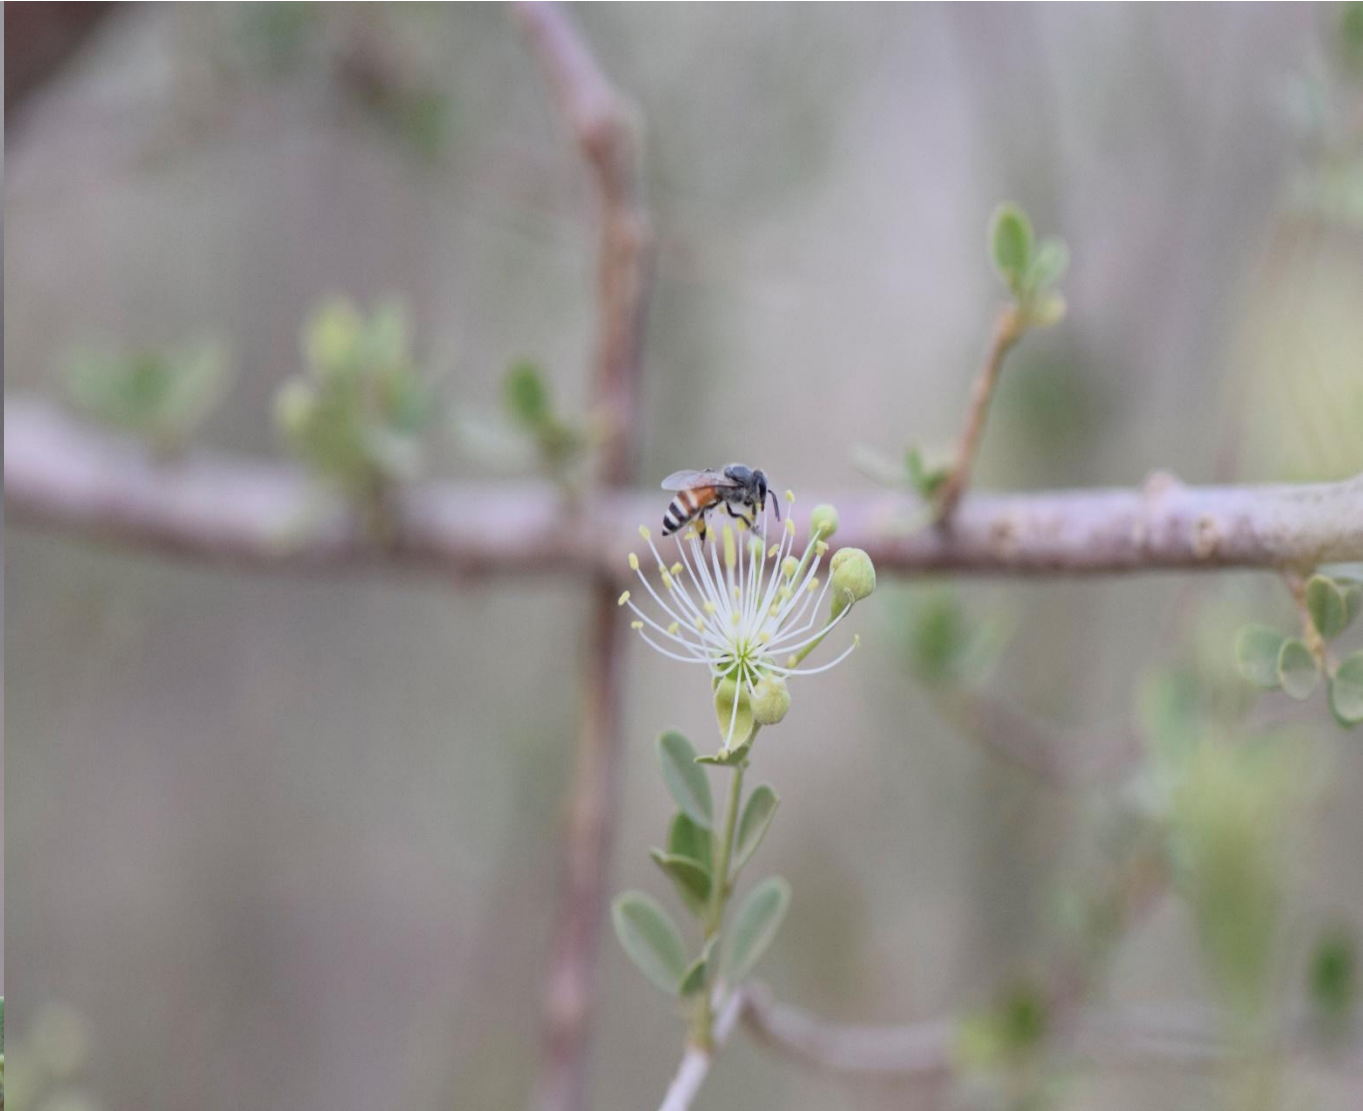



# ***Mentha longifolia***

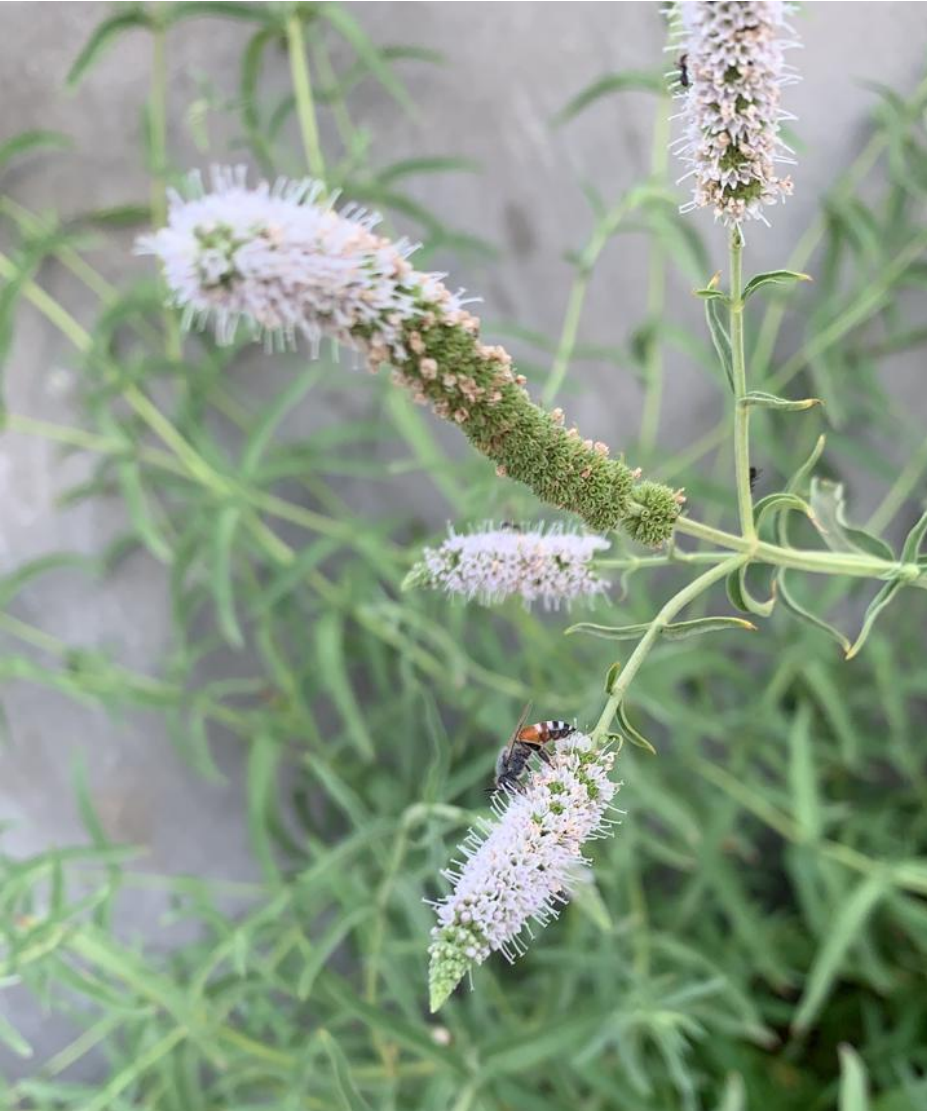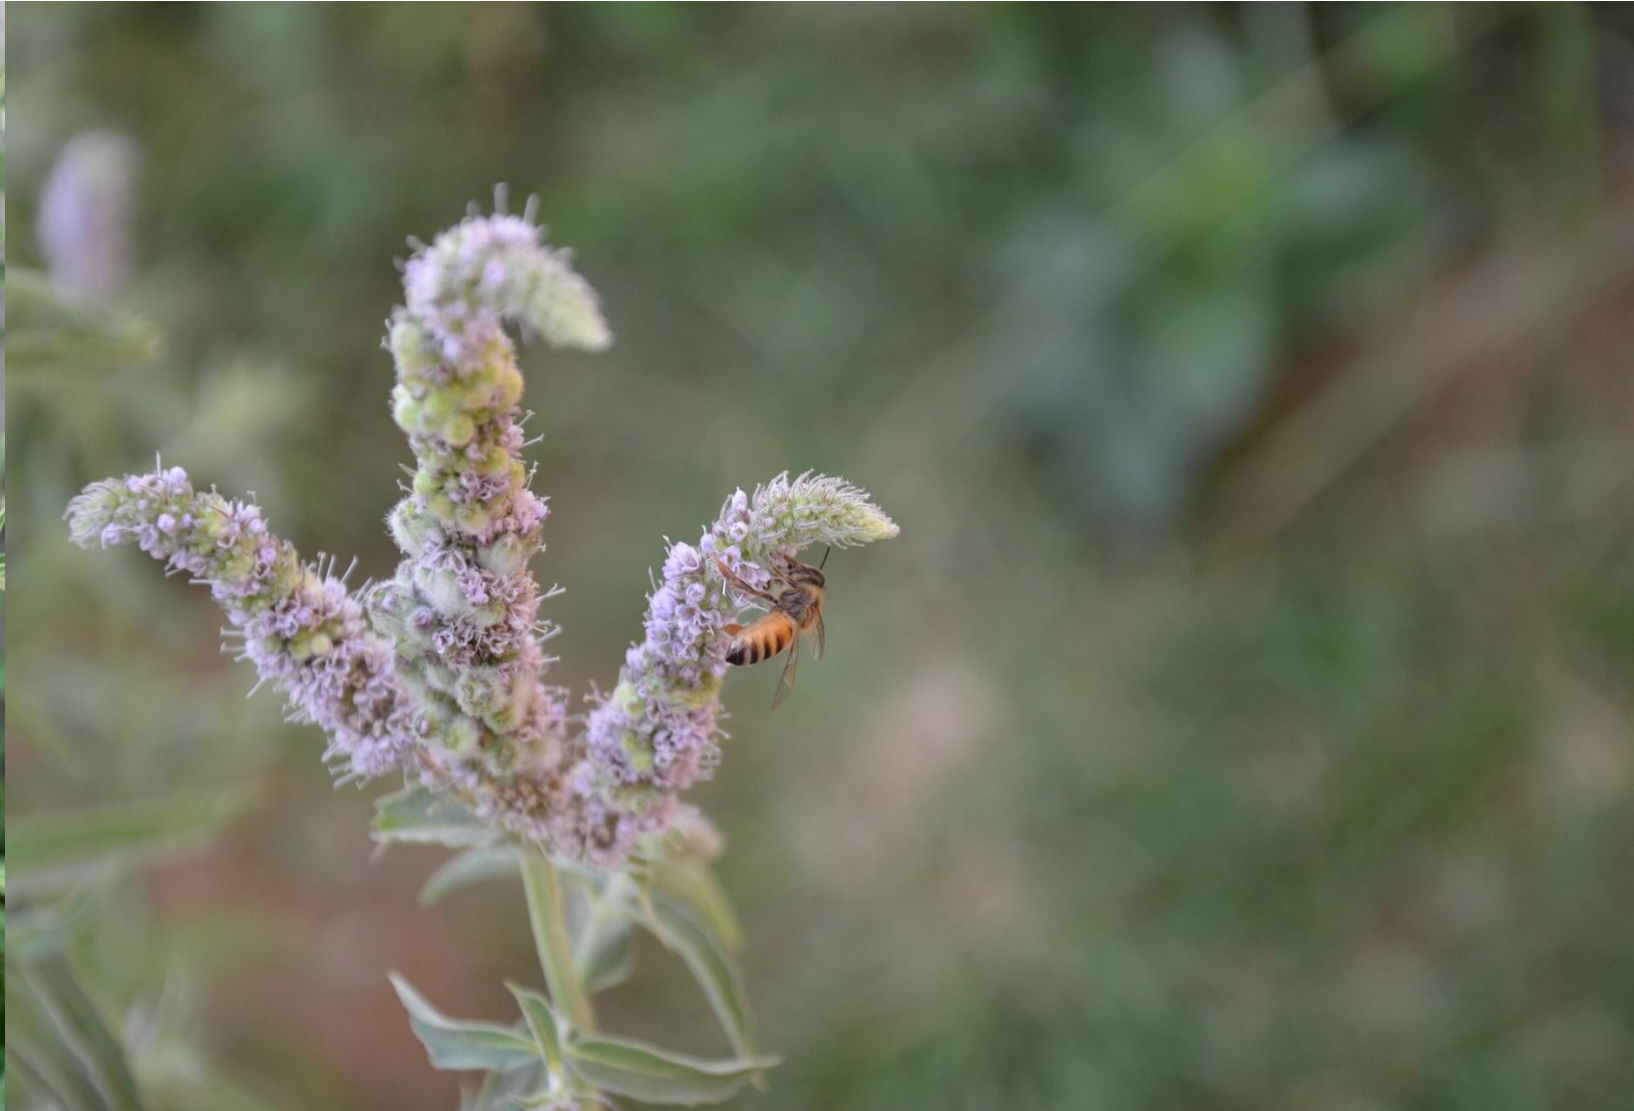



# *Myrtus communis*

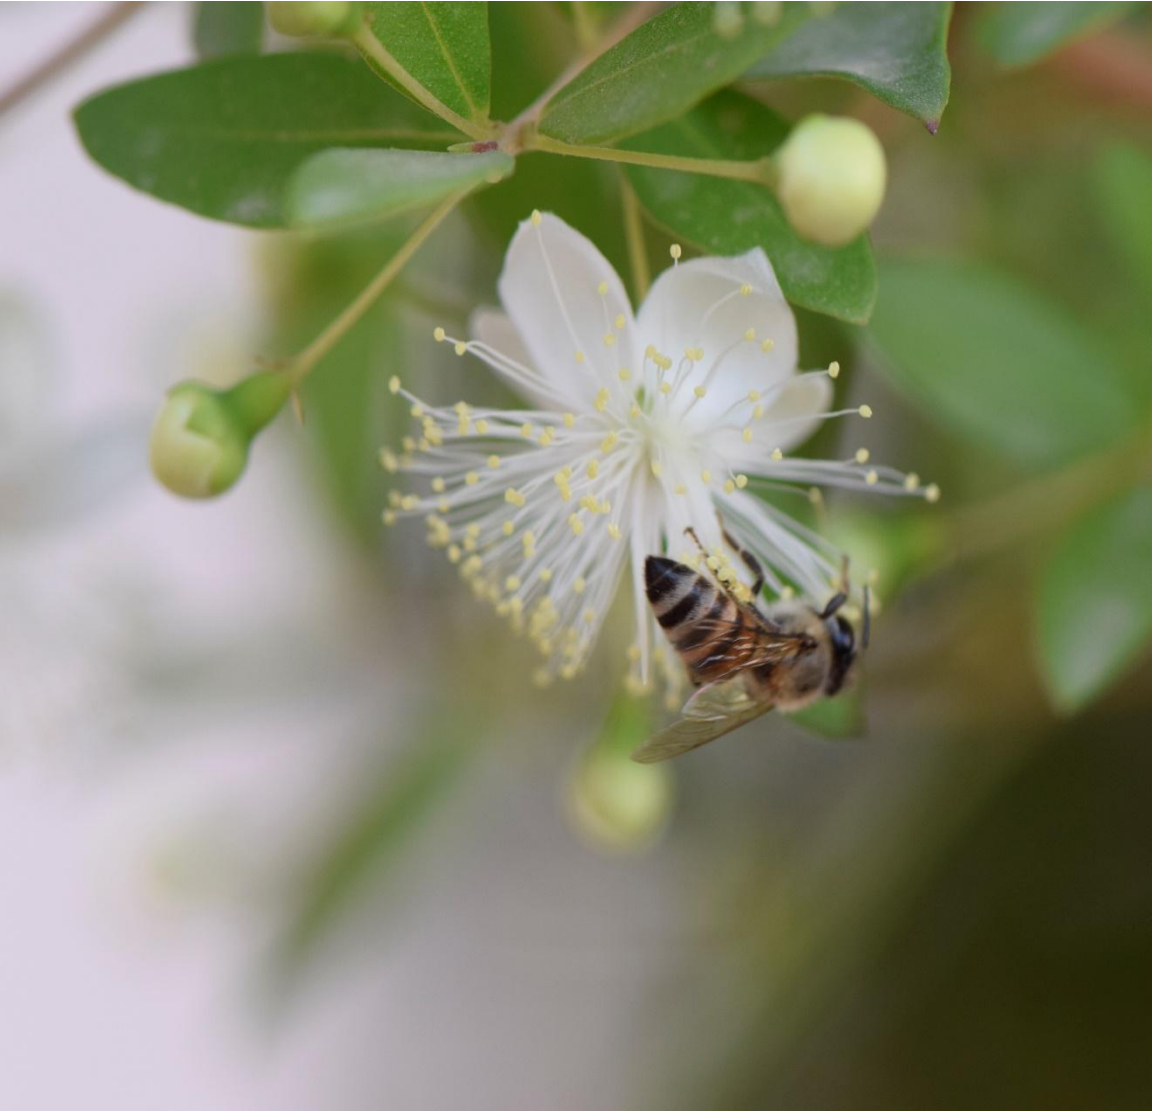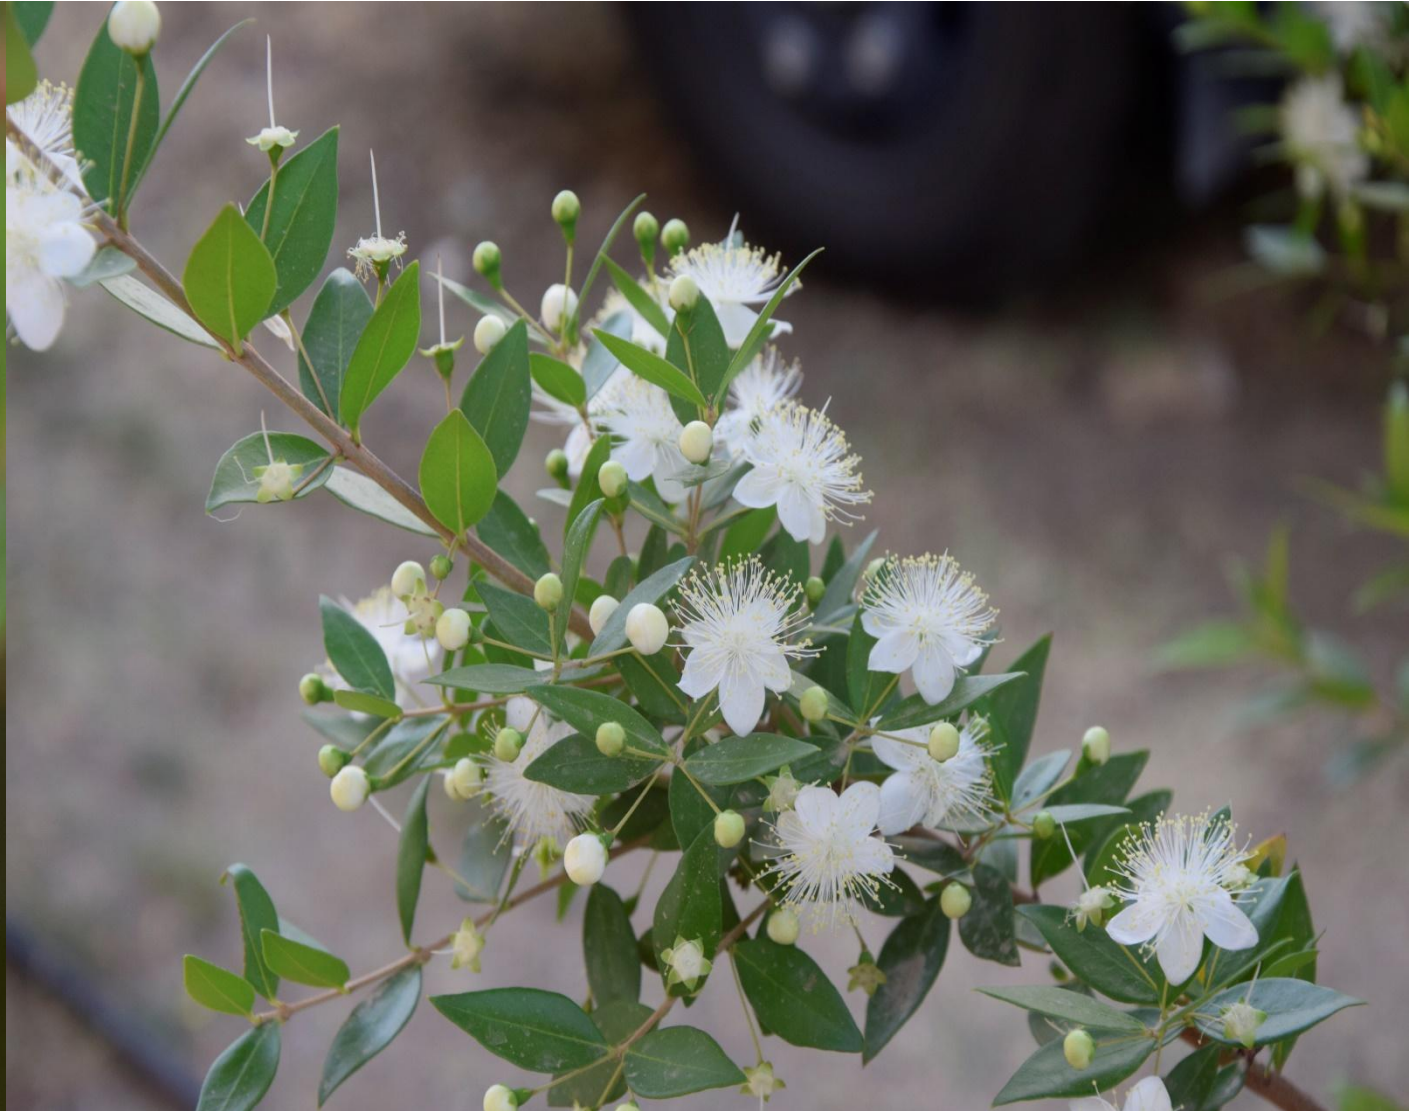



# *Nepeta deflersiana*

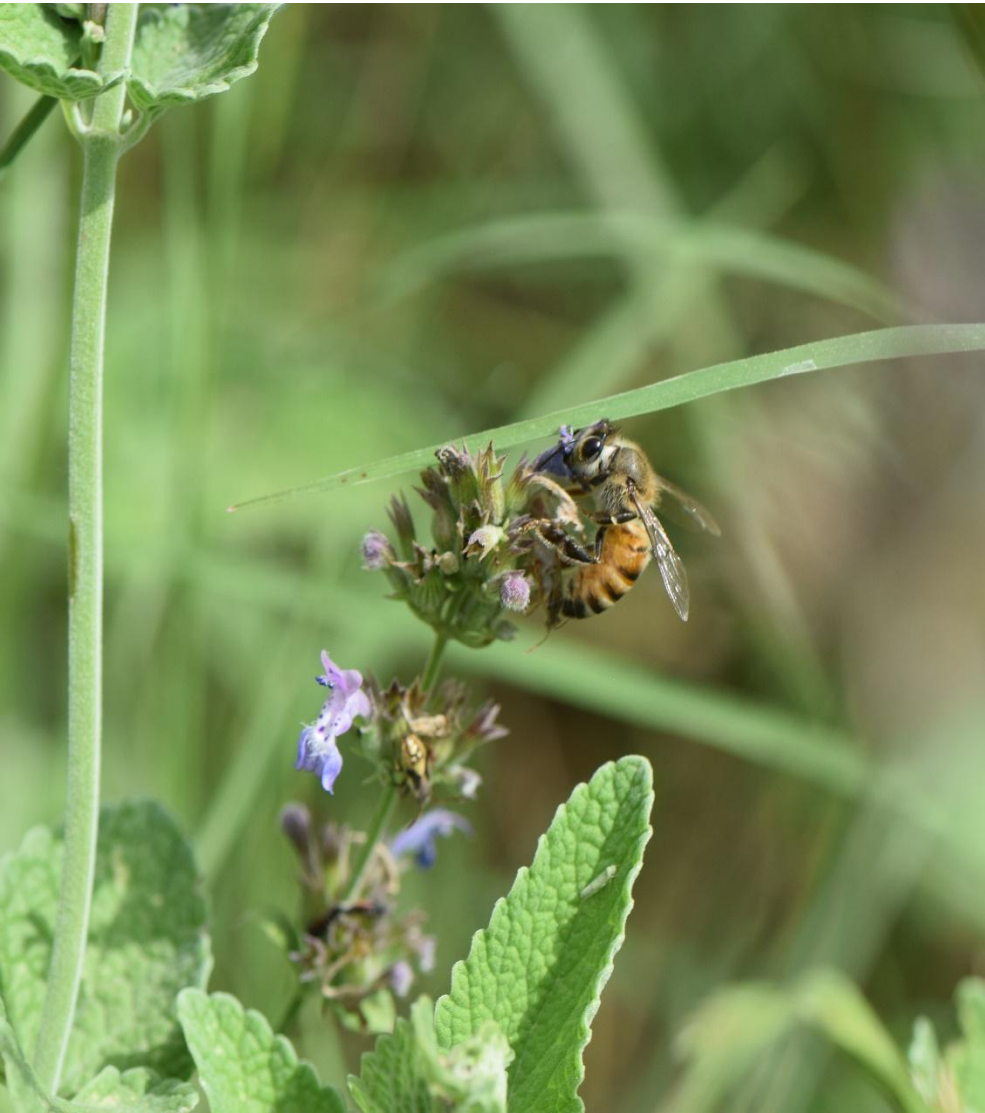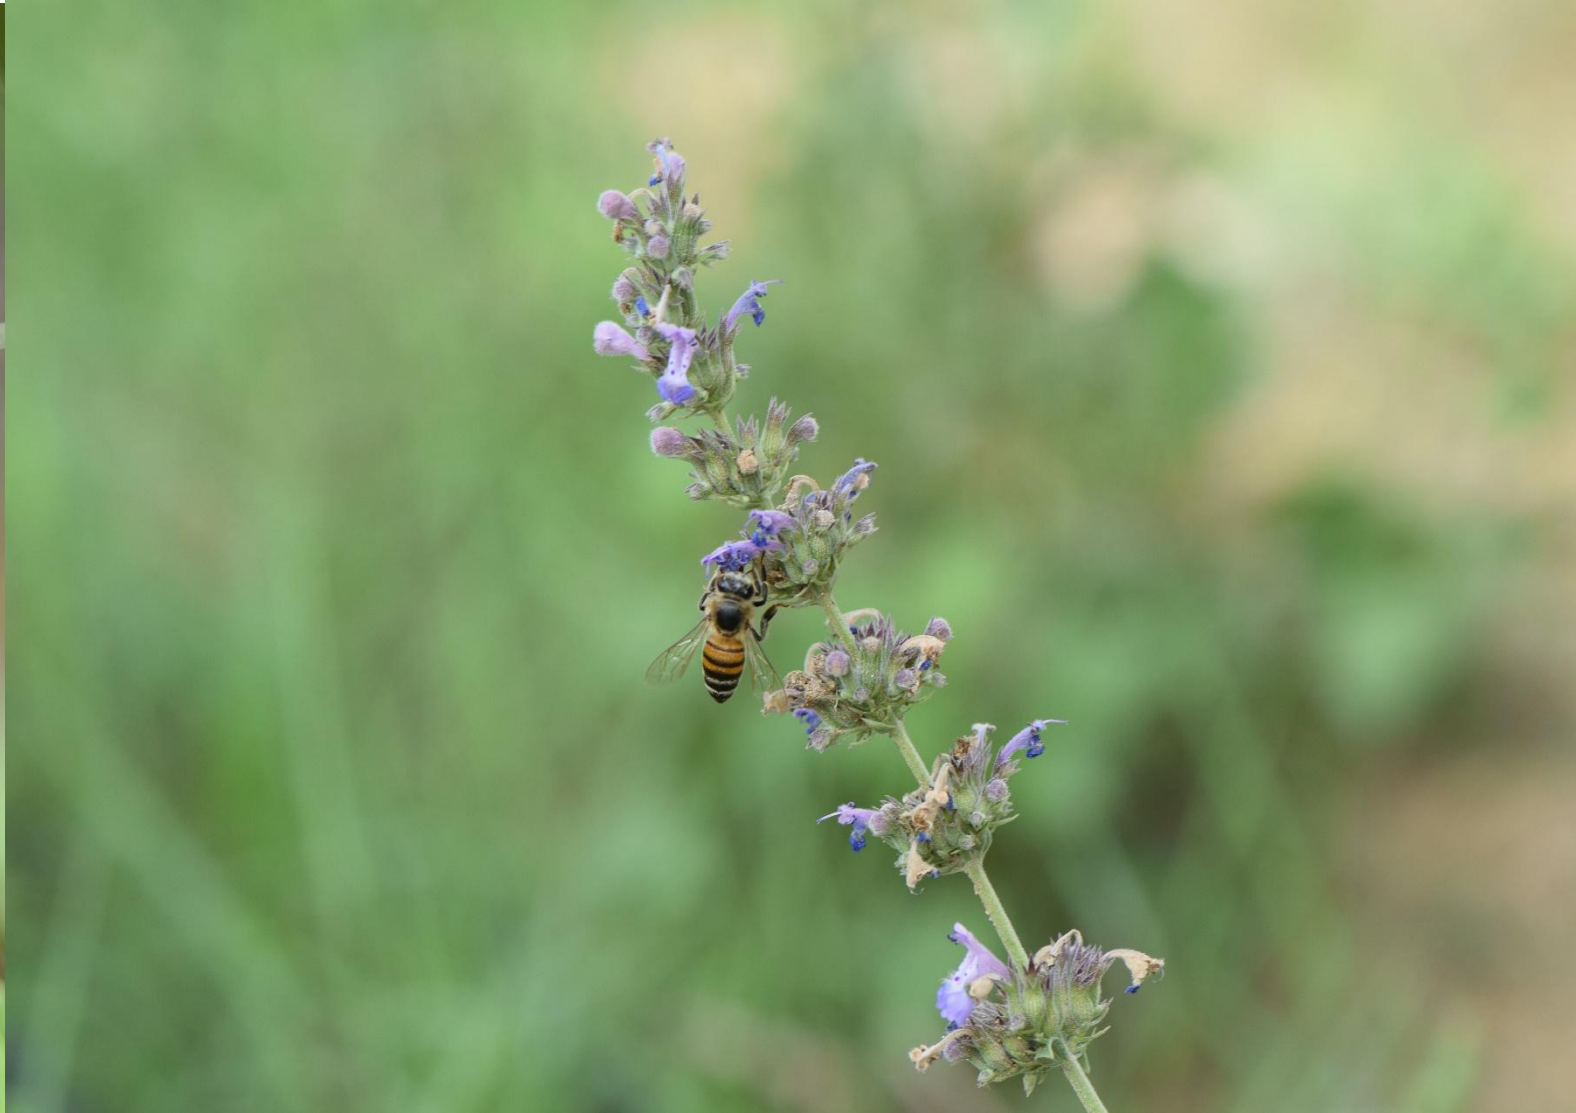



# *Ochradenus baccatus*

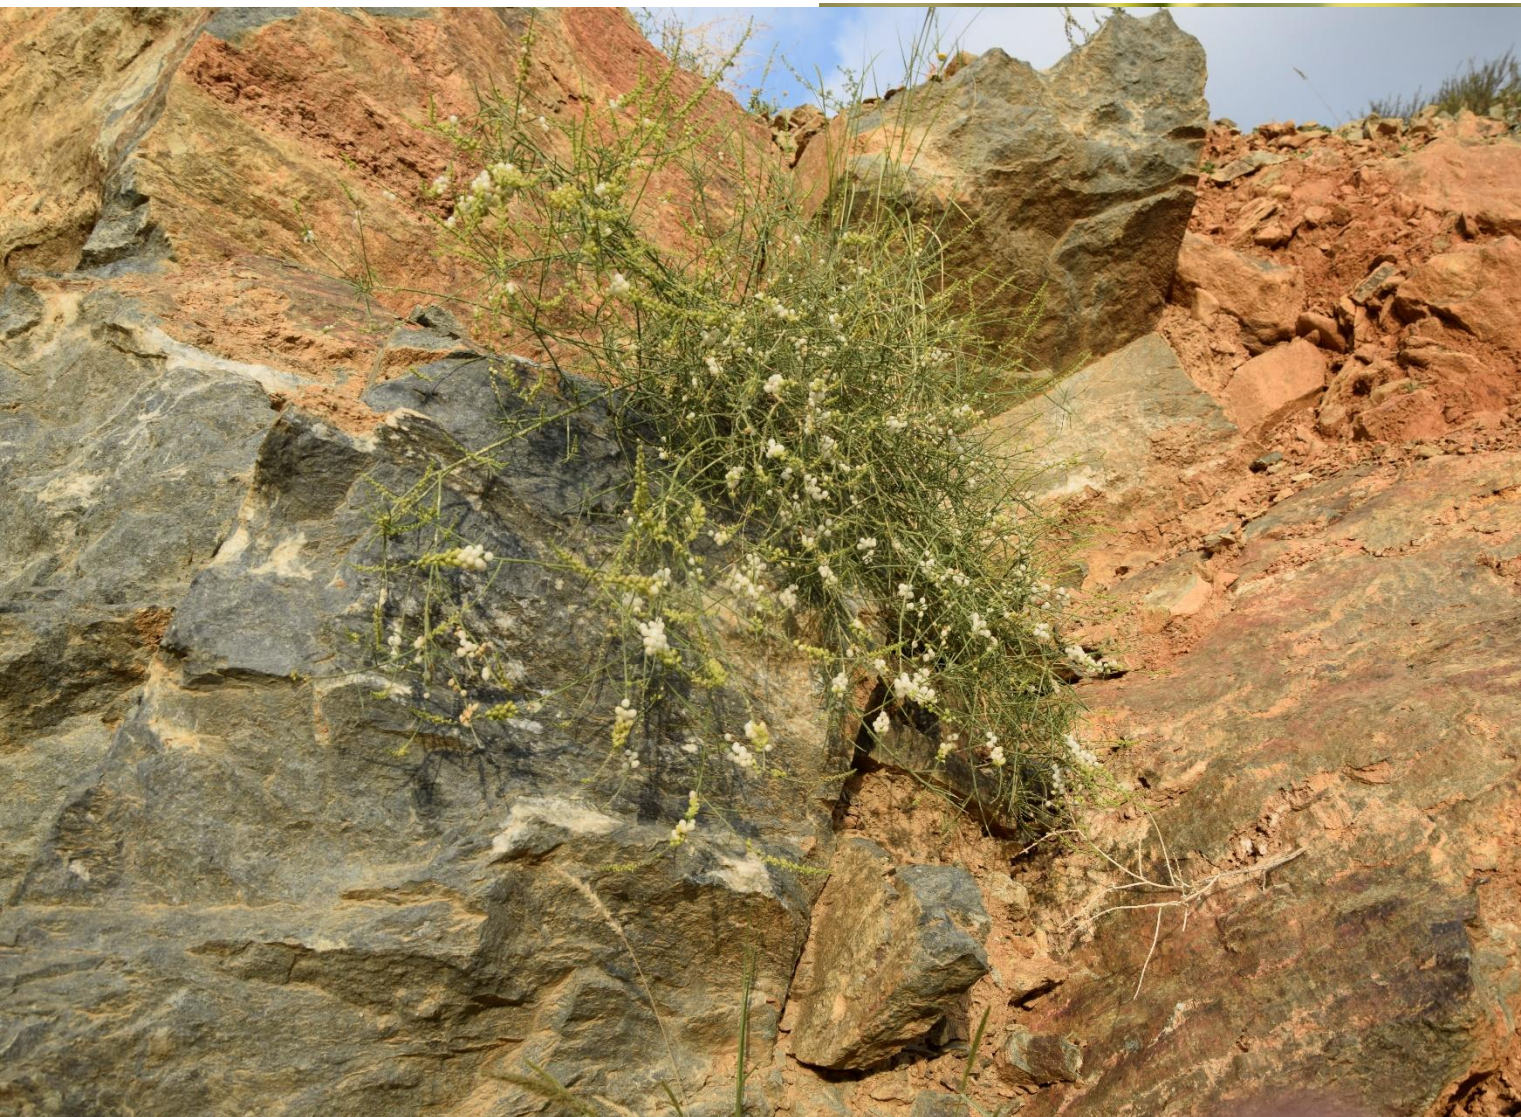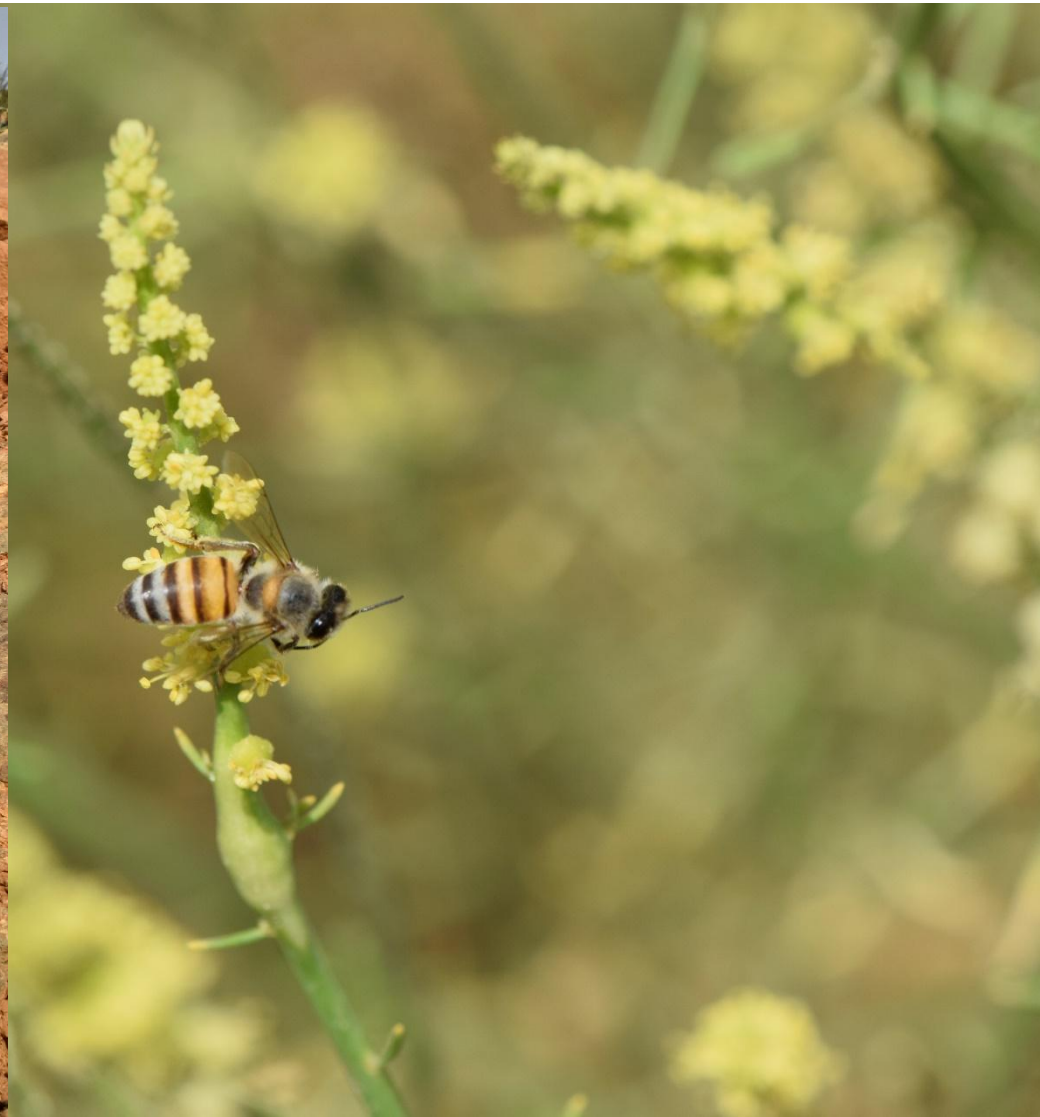



# ***Onobrychis ptolemaica***

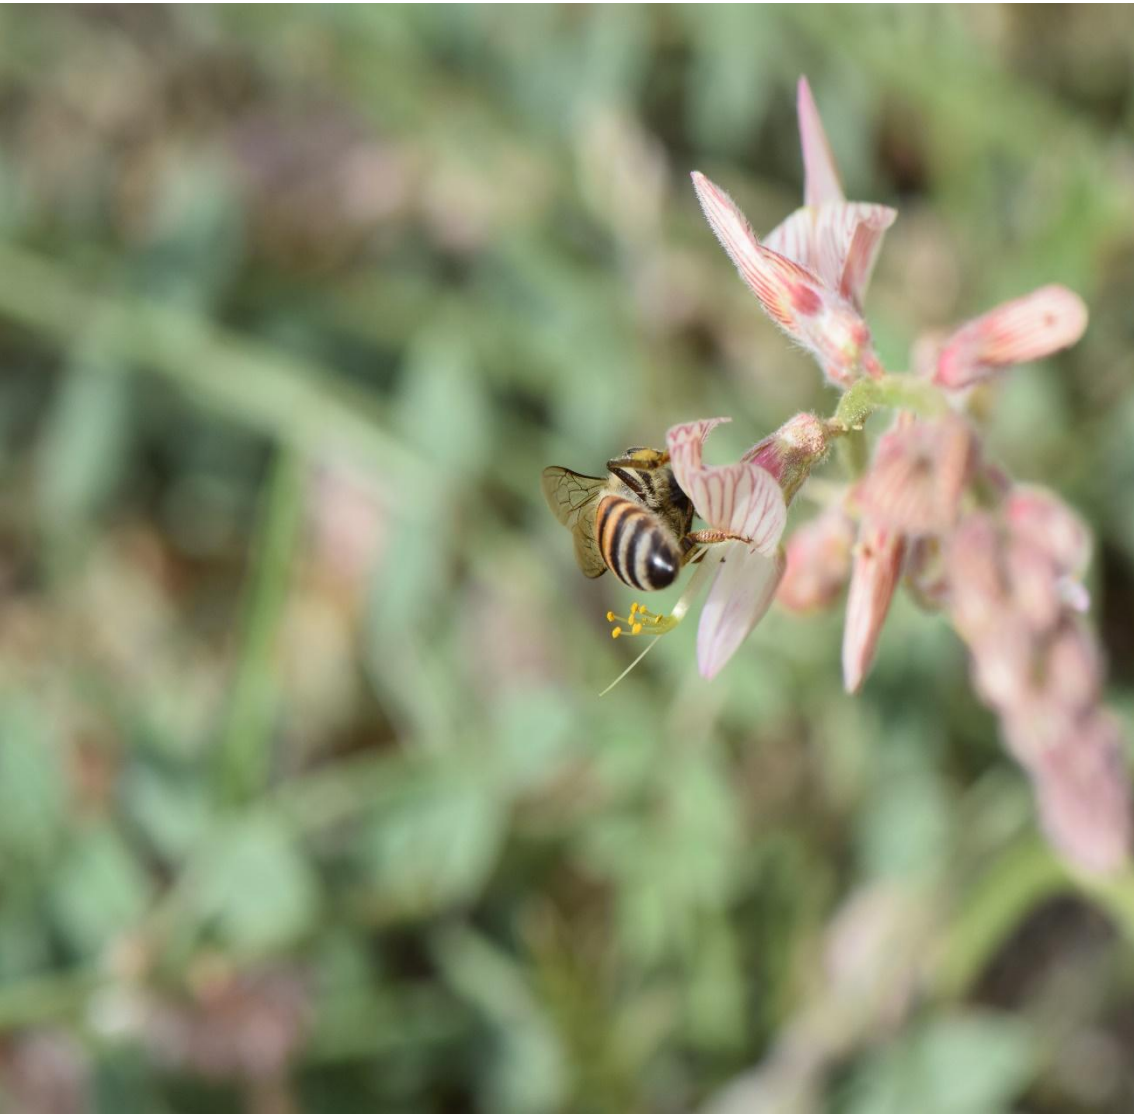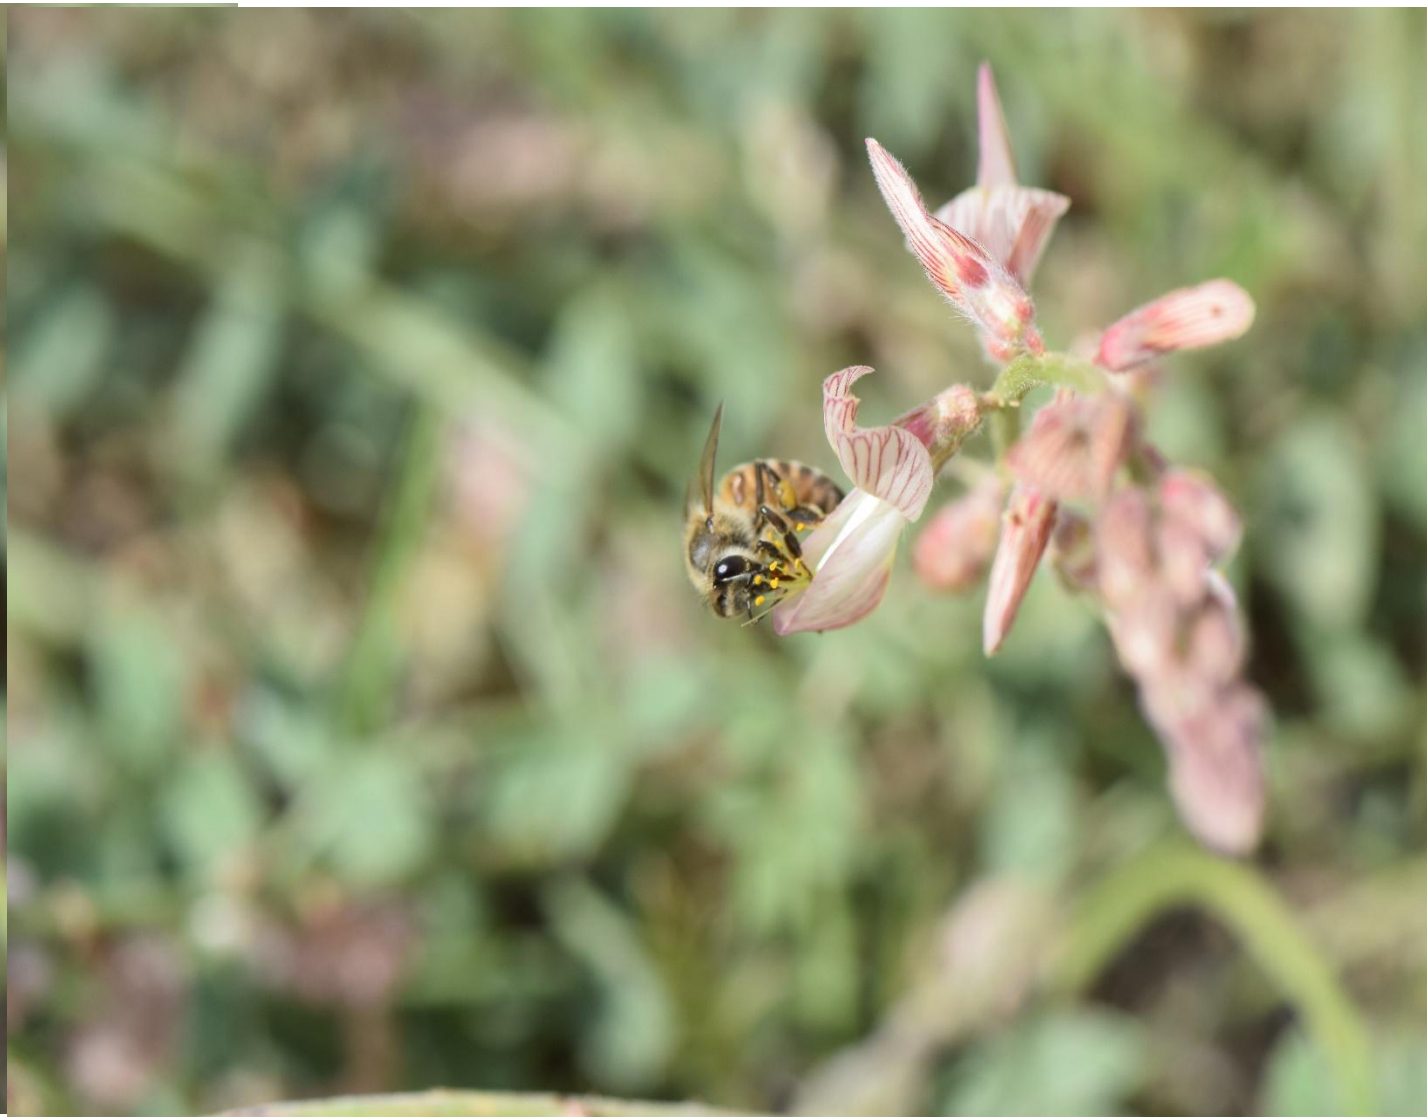



# *Onopordum heteracanthum*

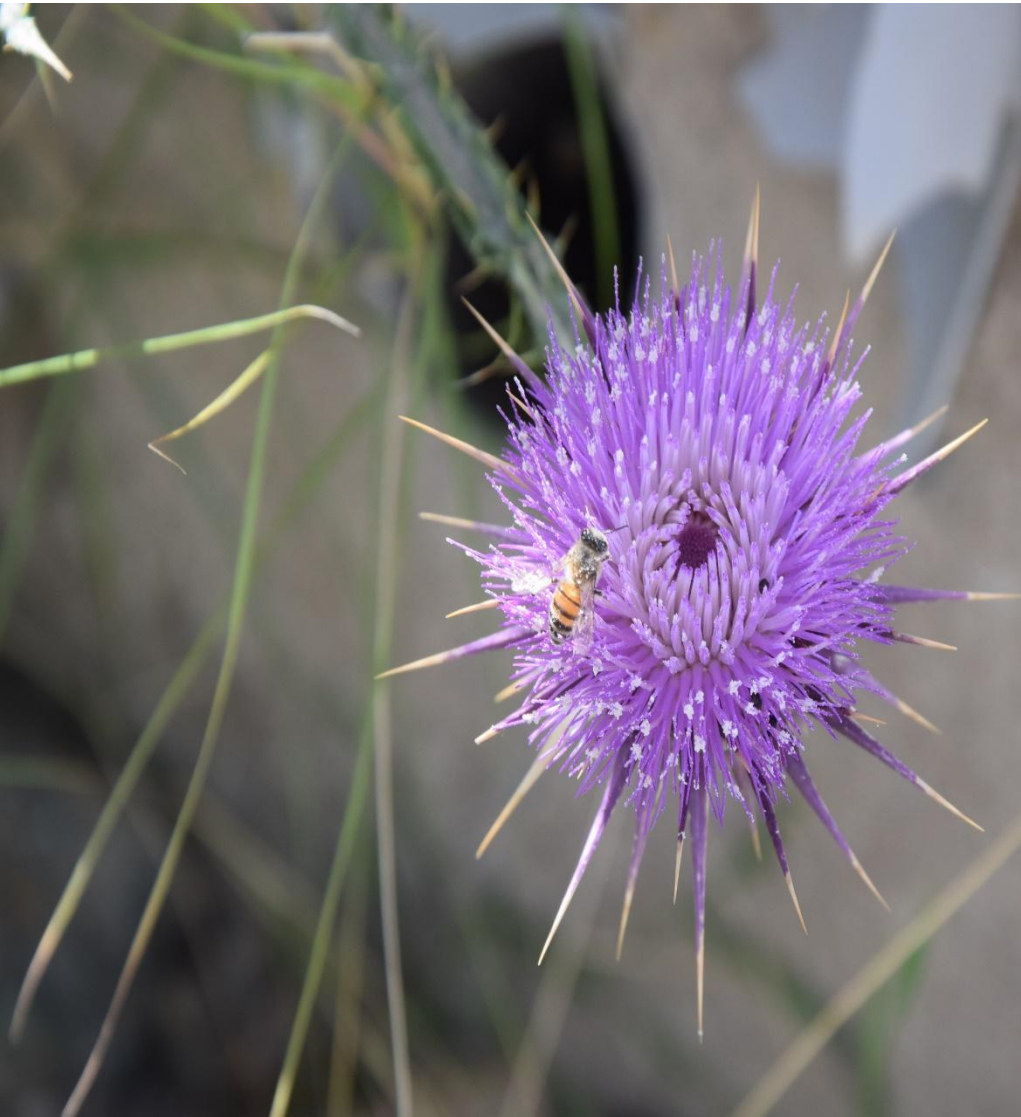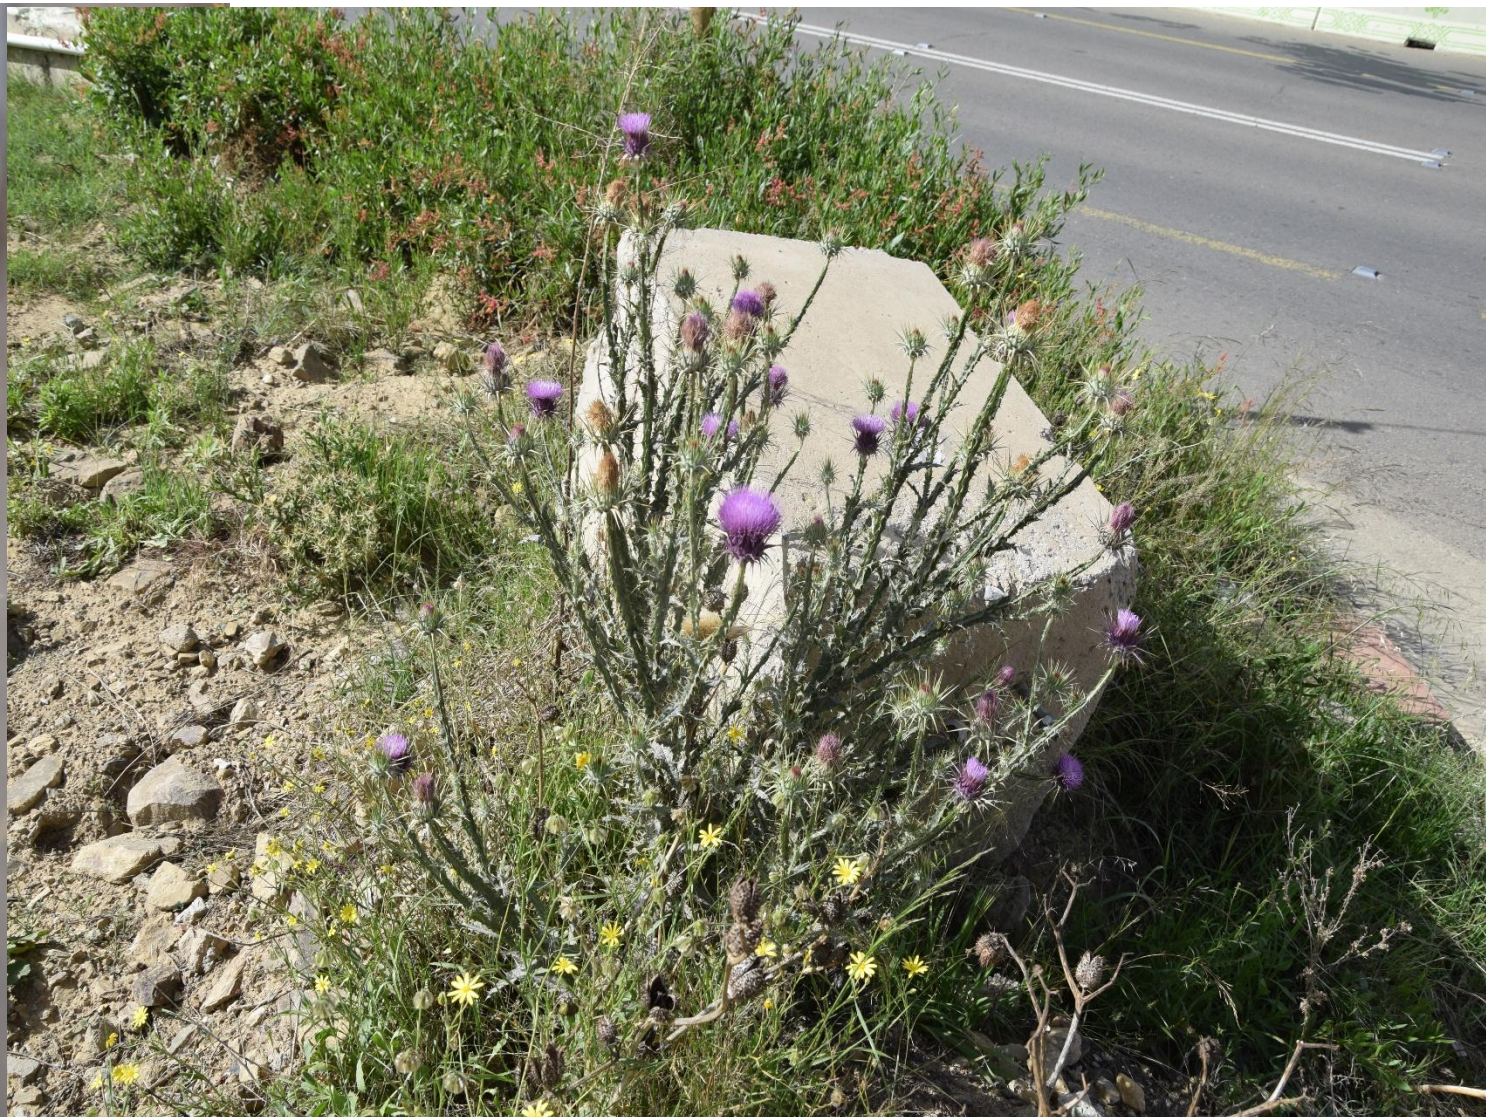



# *Opuntia ficus indica*

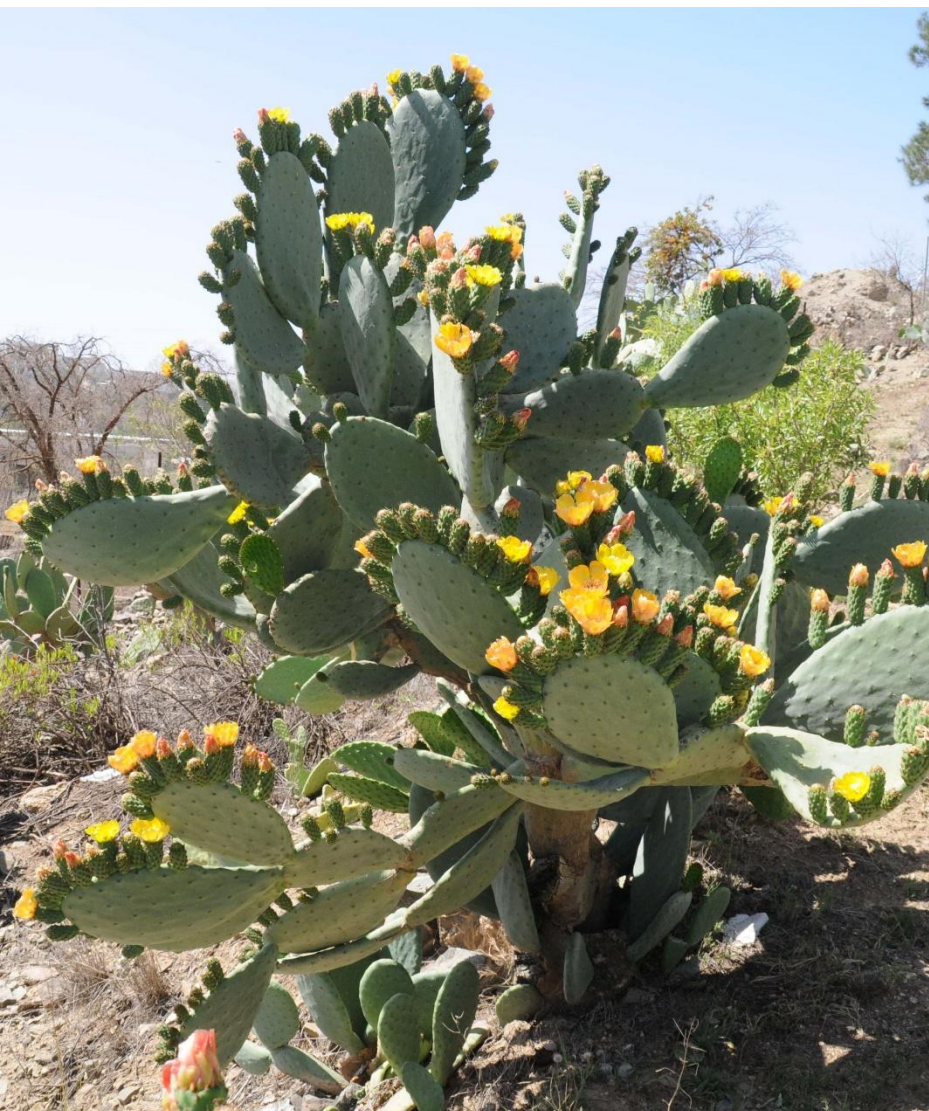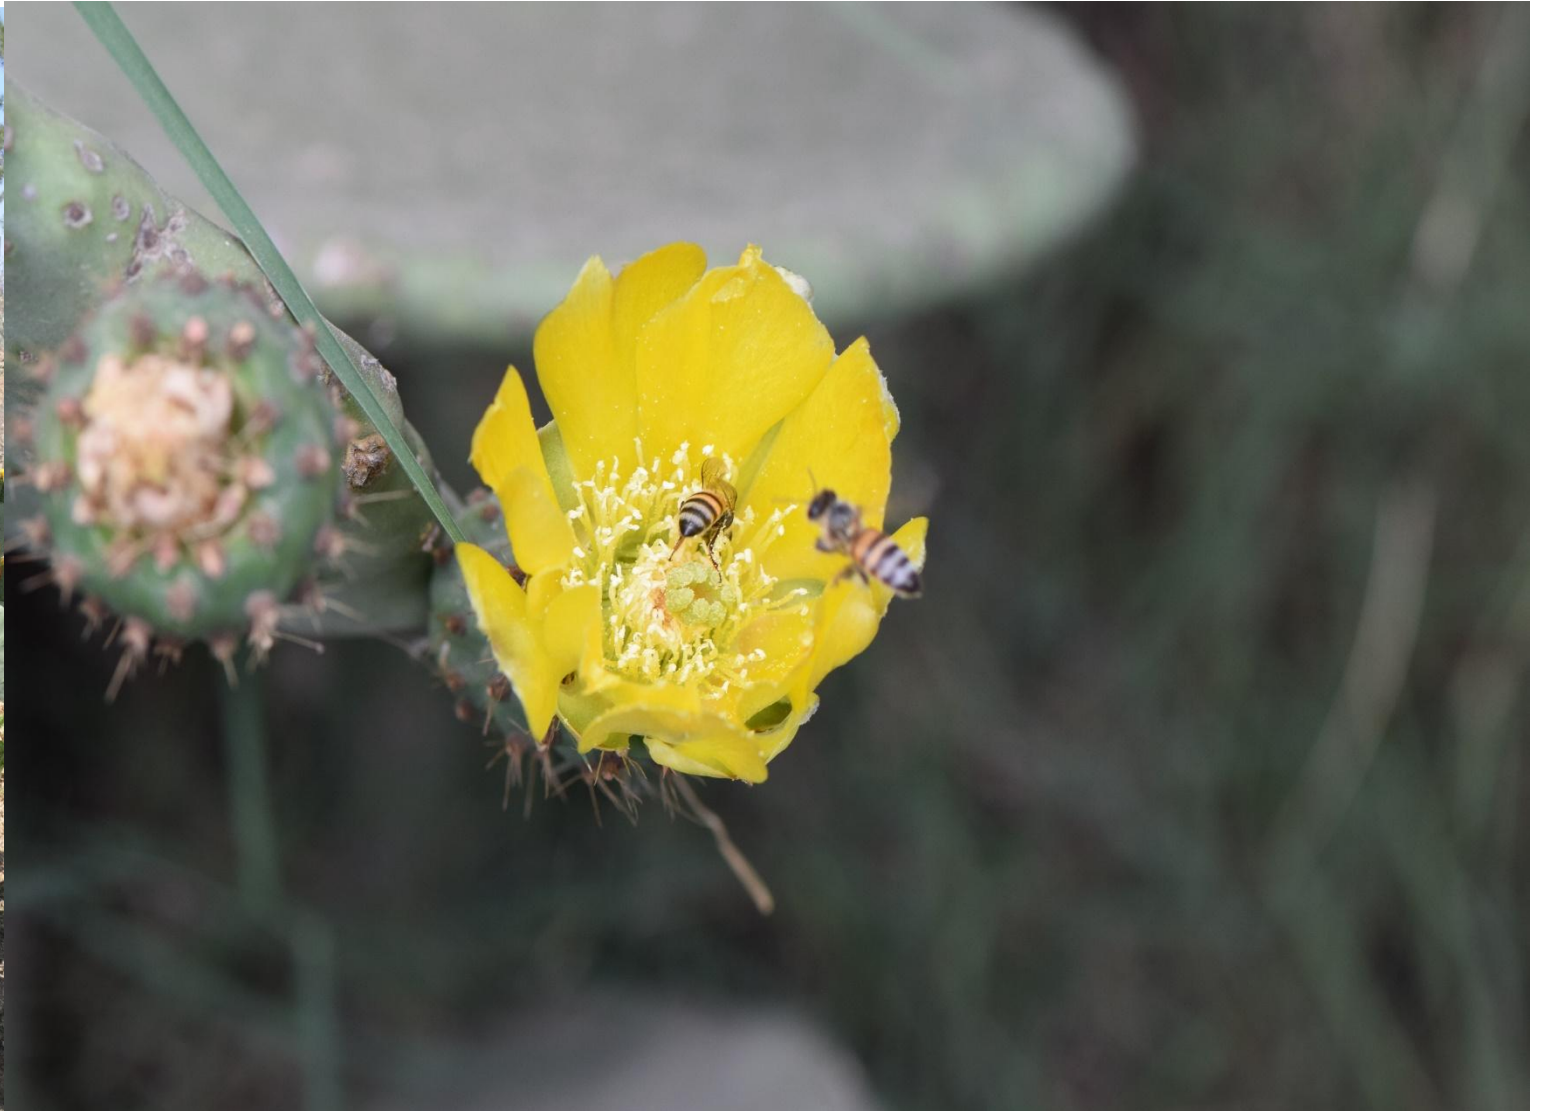



# *Osteospermum vaillantii*

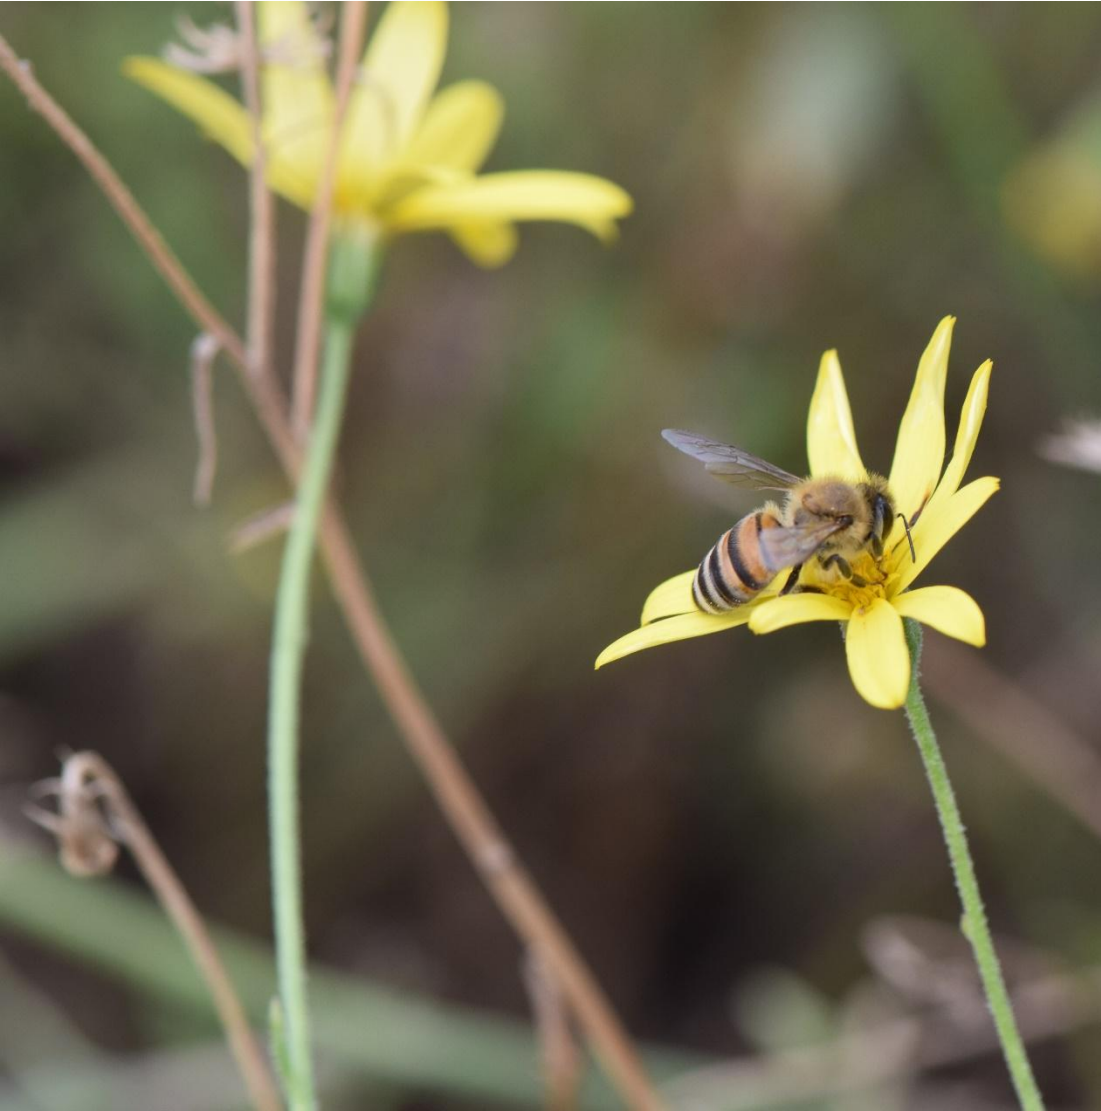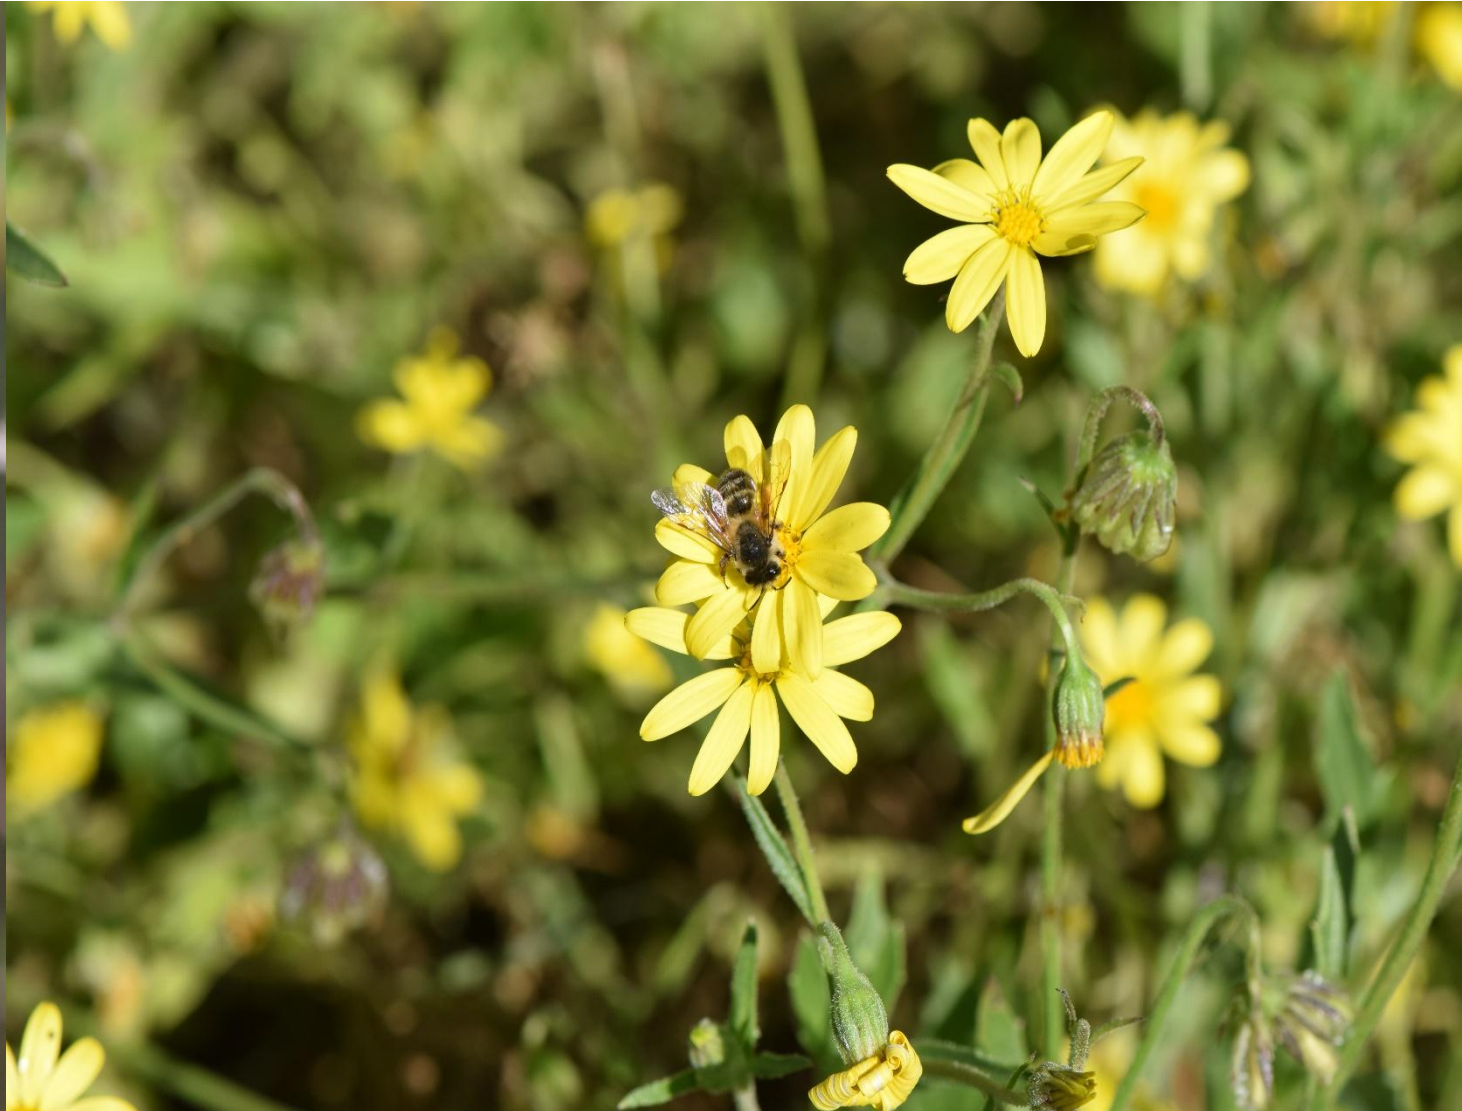



# *Oxalis corniculata*

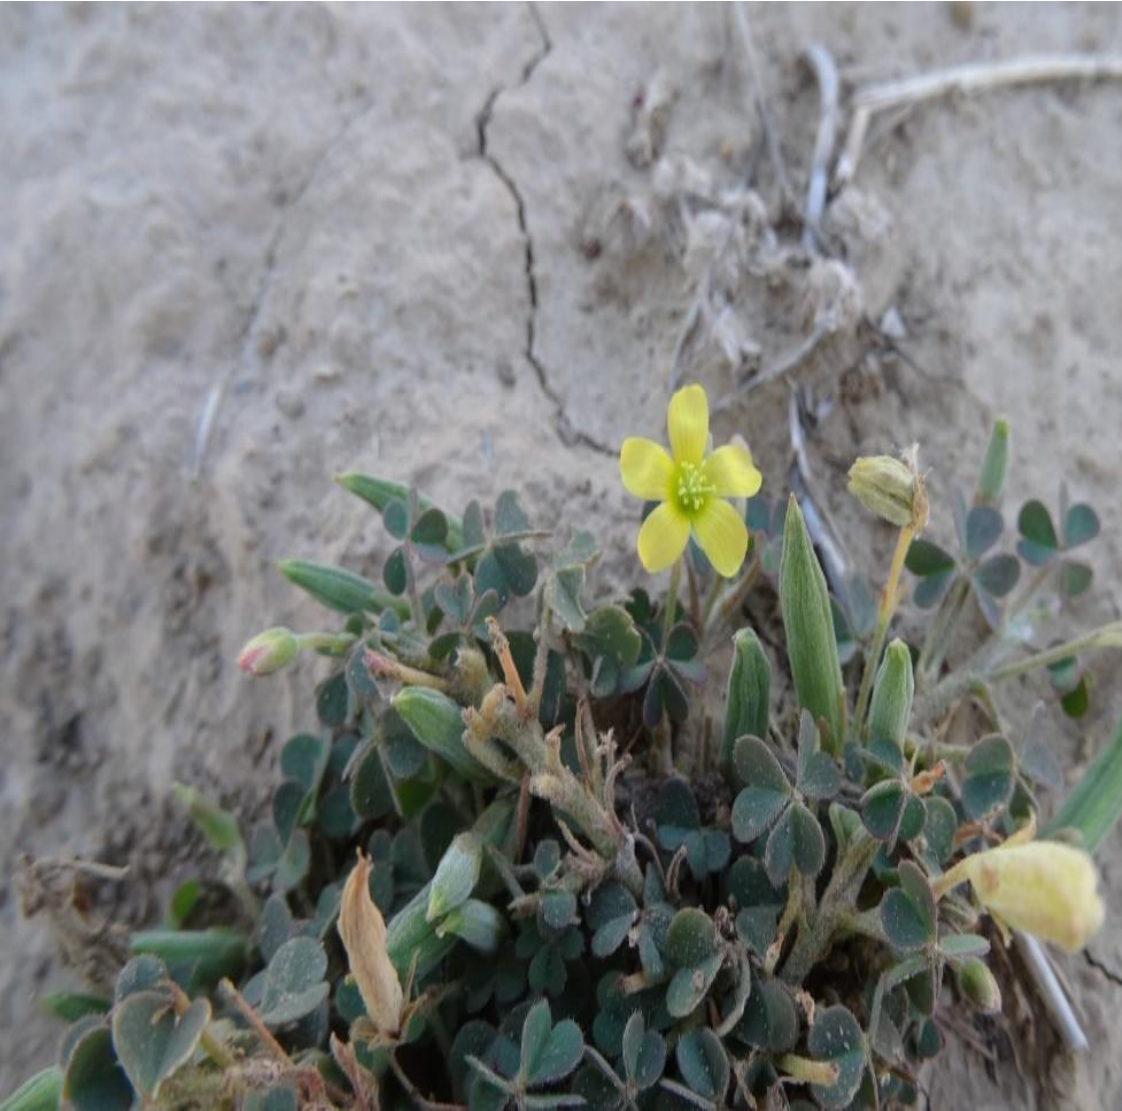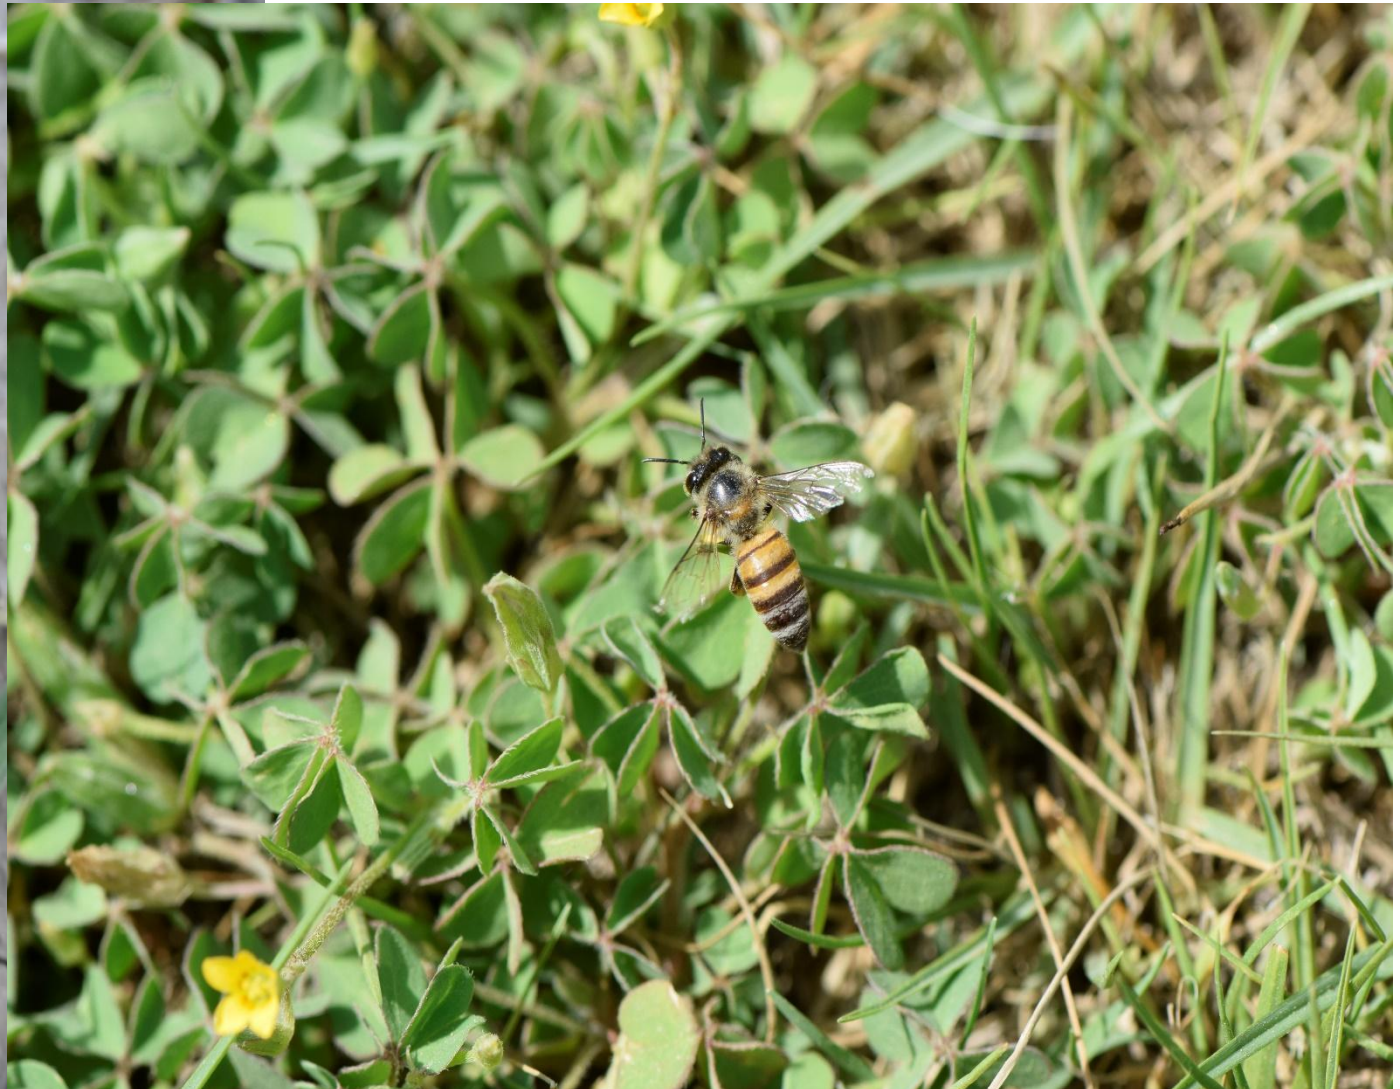



# ***Picris asplenioides***

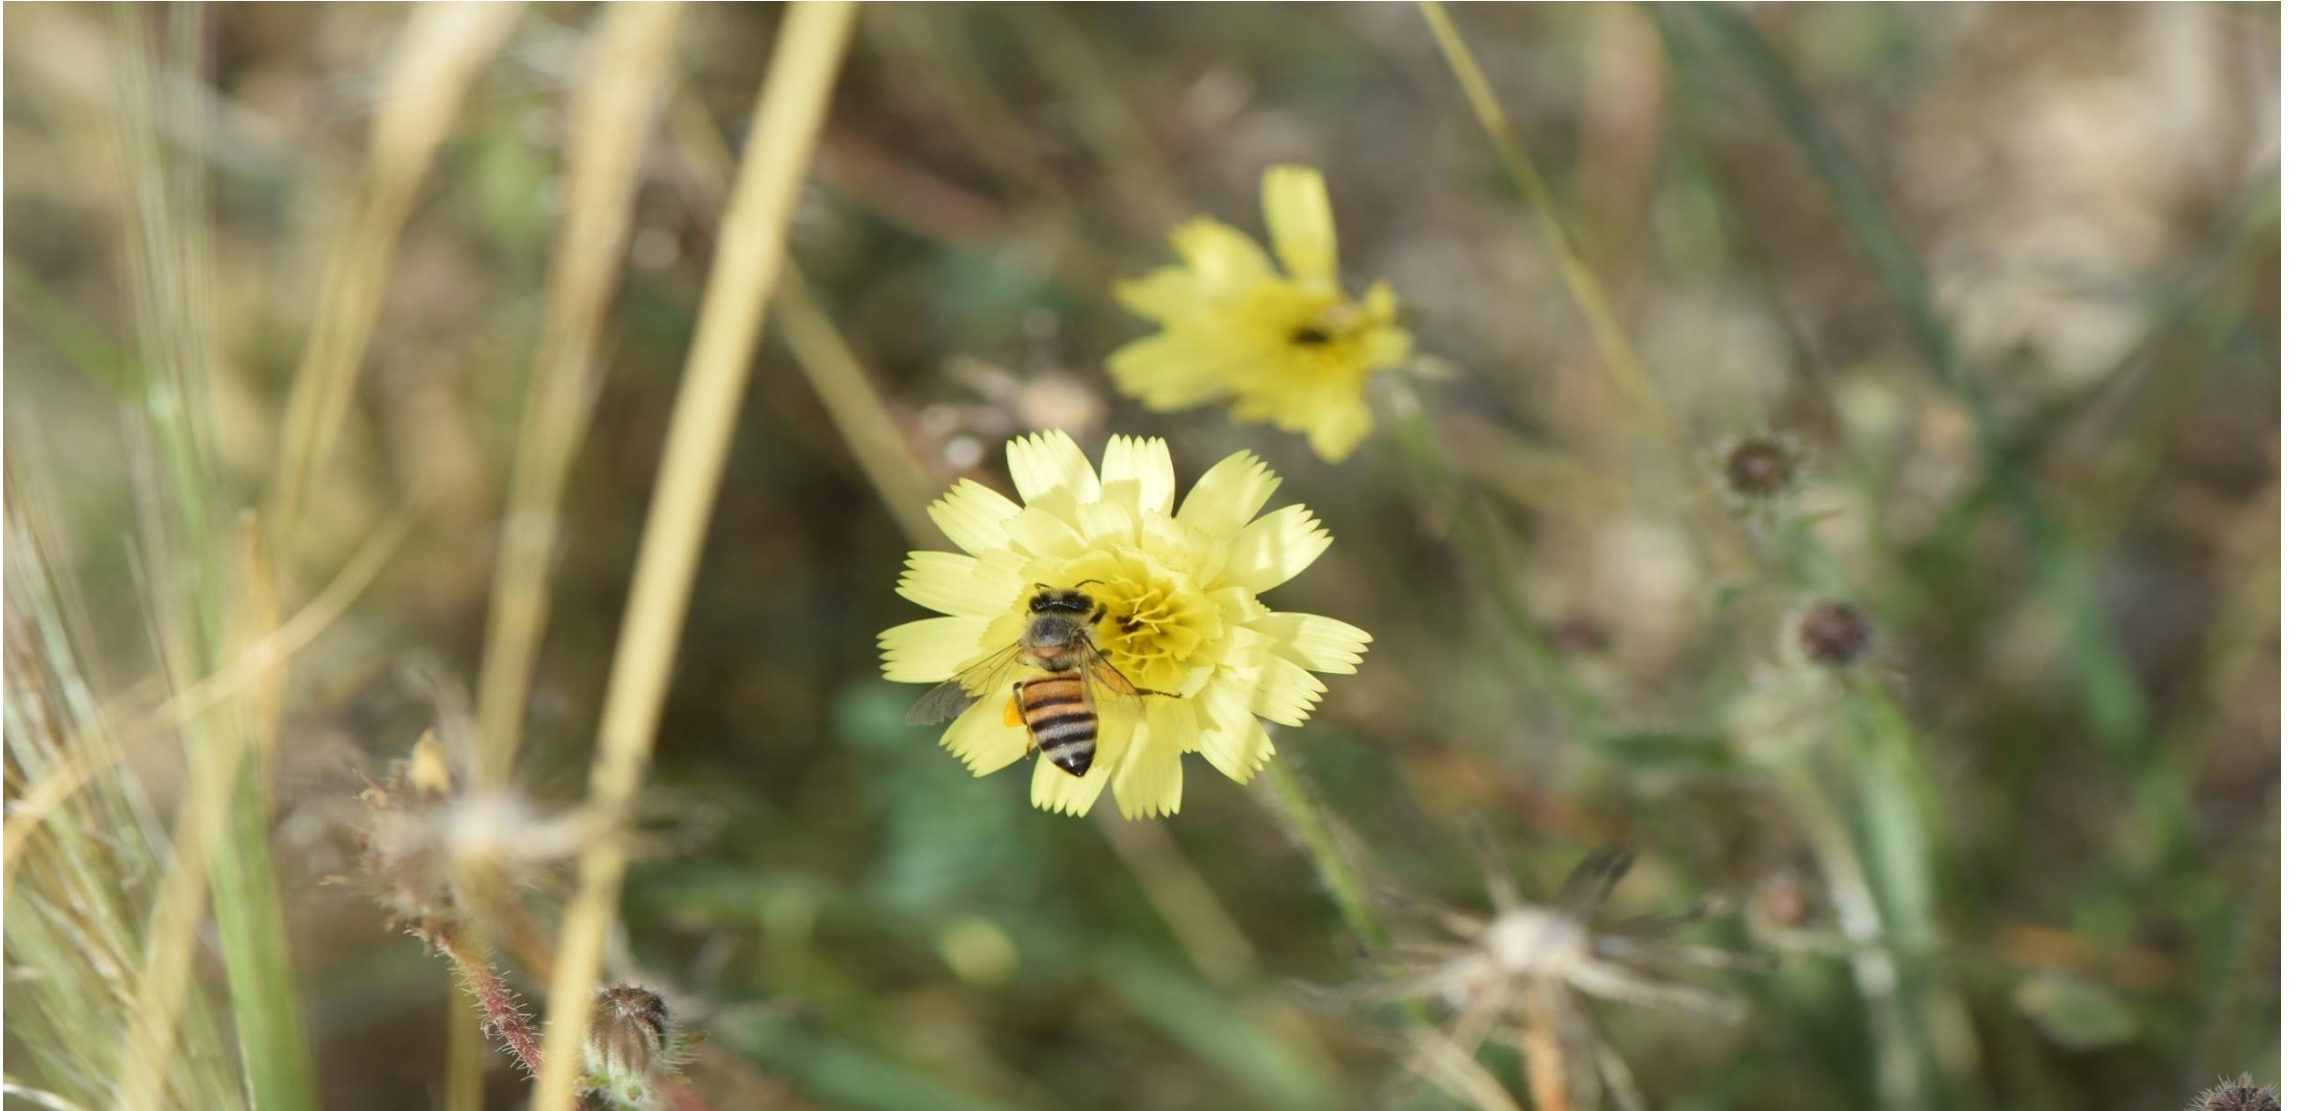



# *Plantago cylindrica*

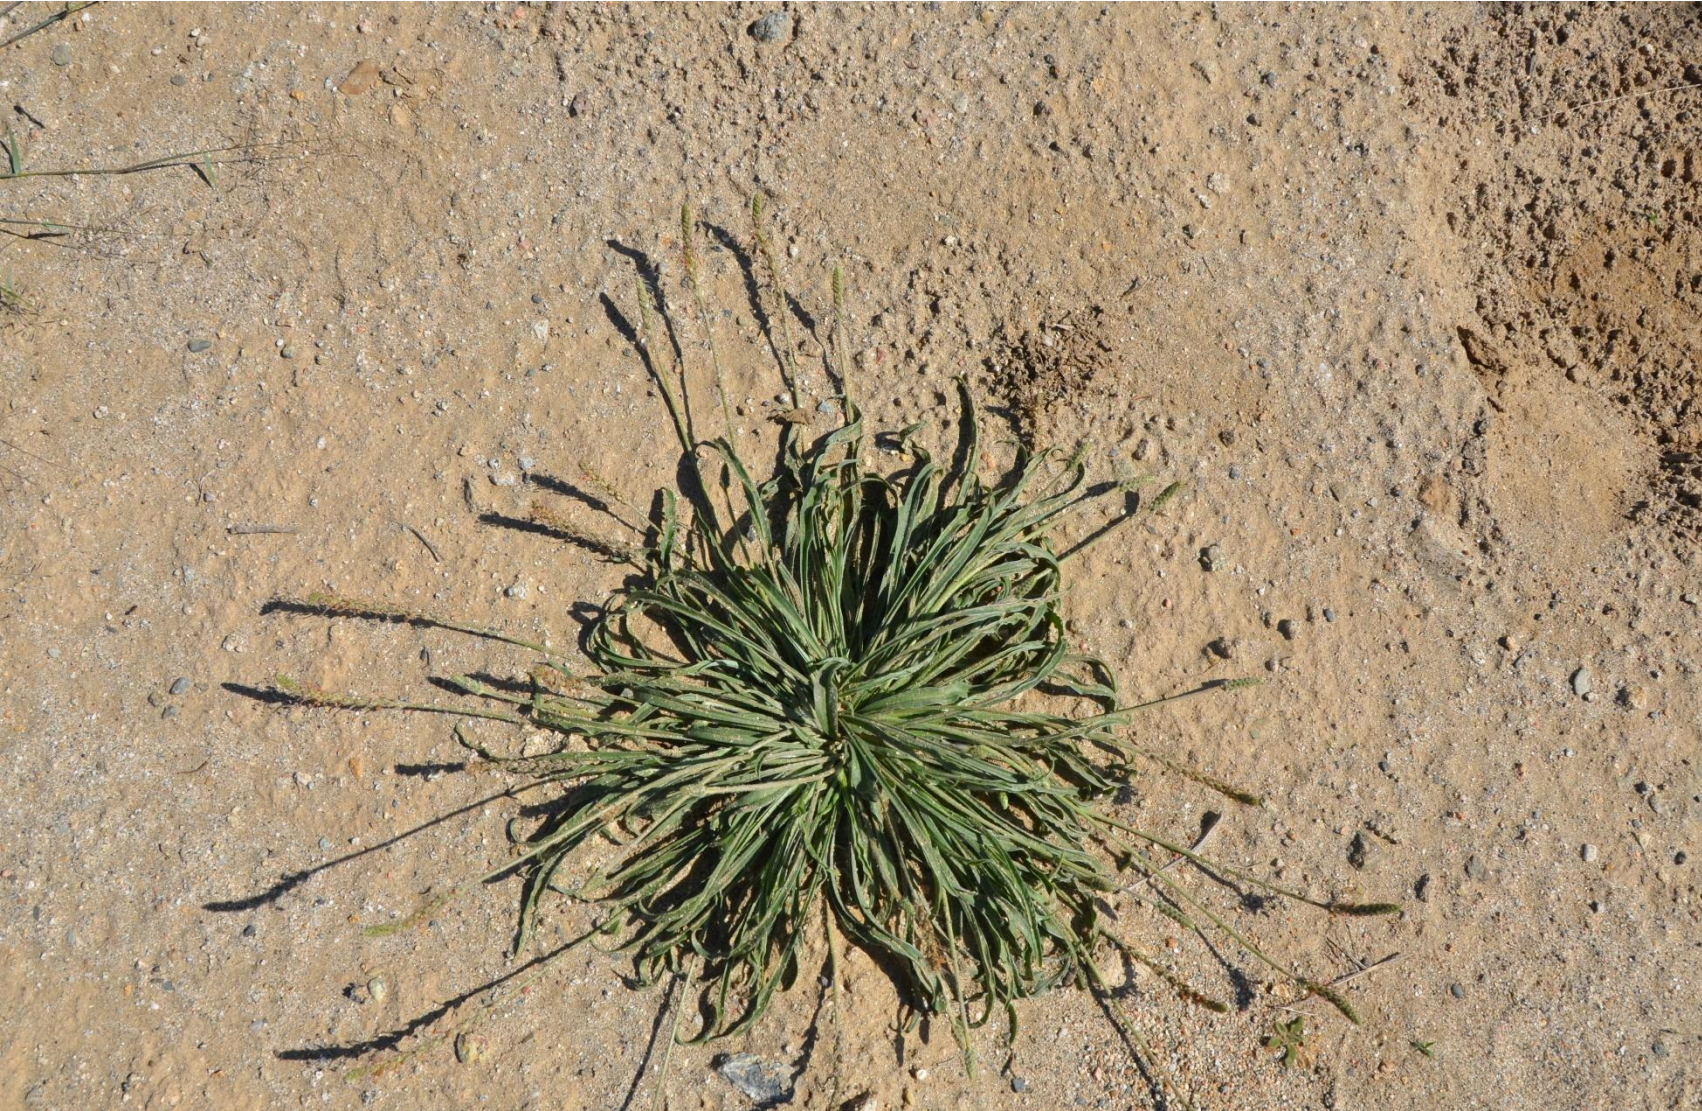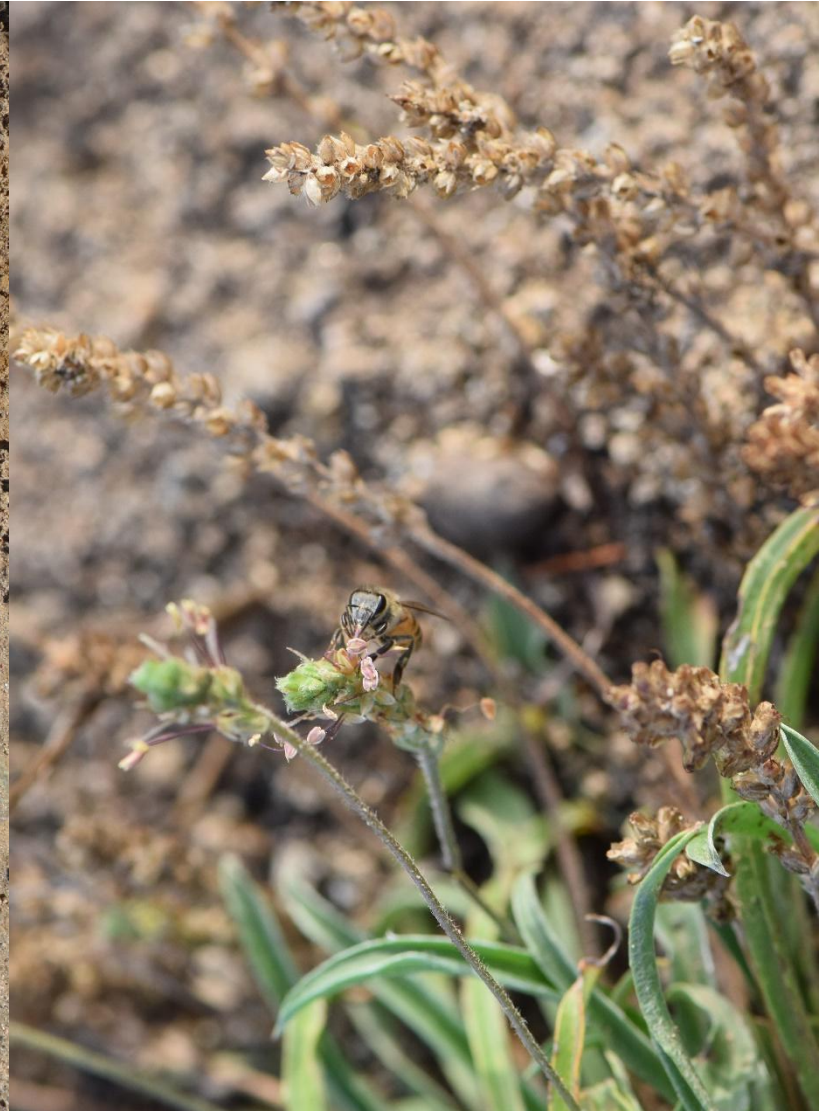



# ***Pluchea dioscoridis***

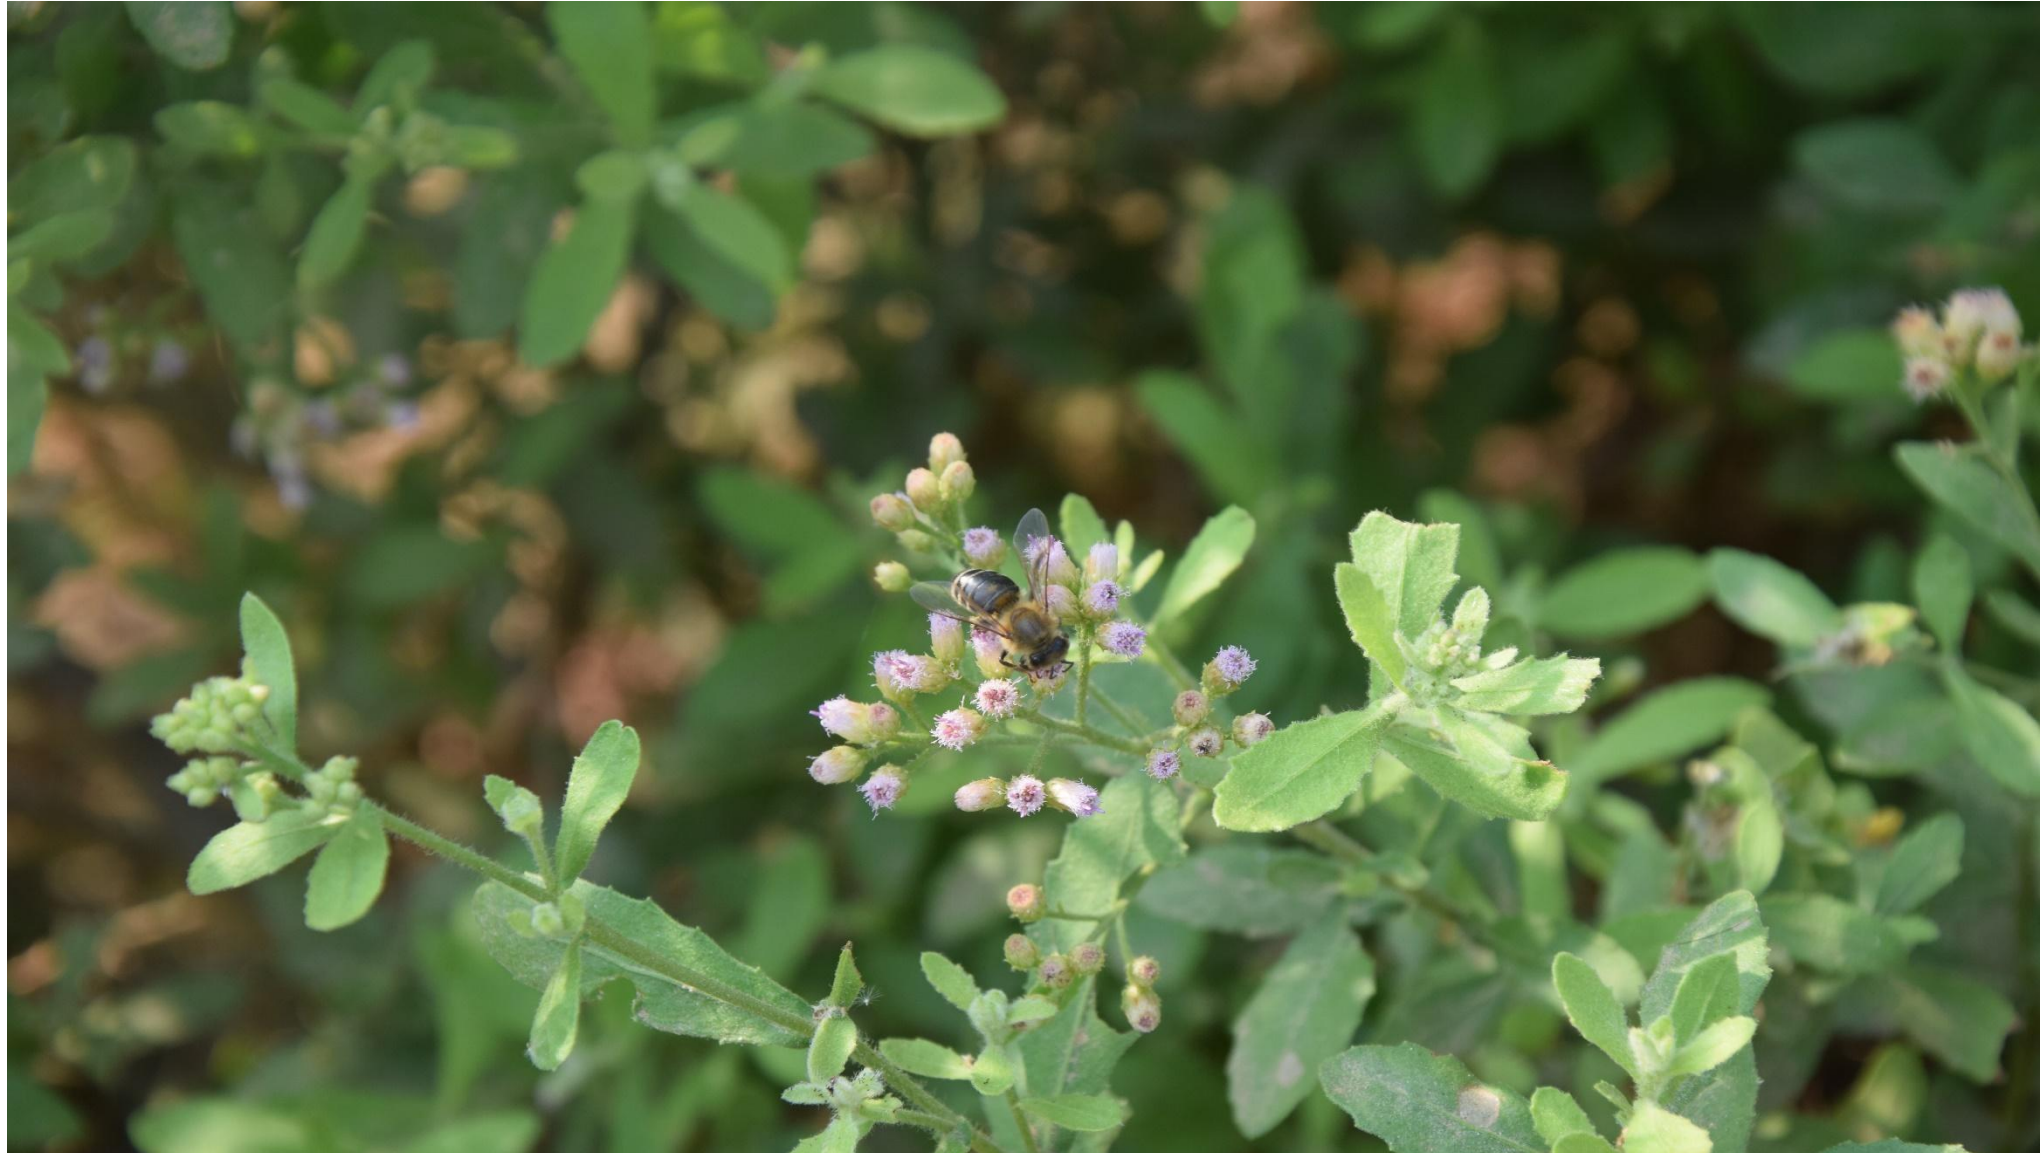



# *Psiadia punctulata*

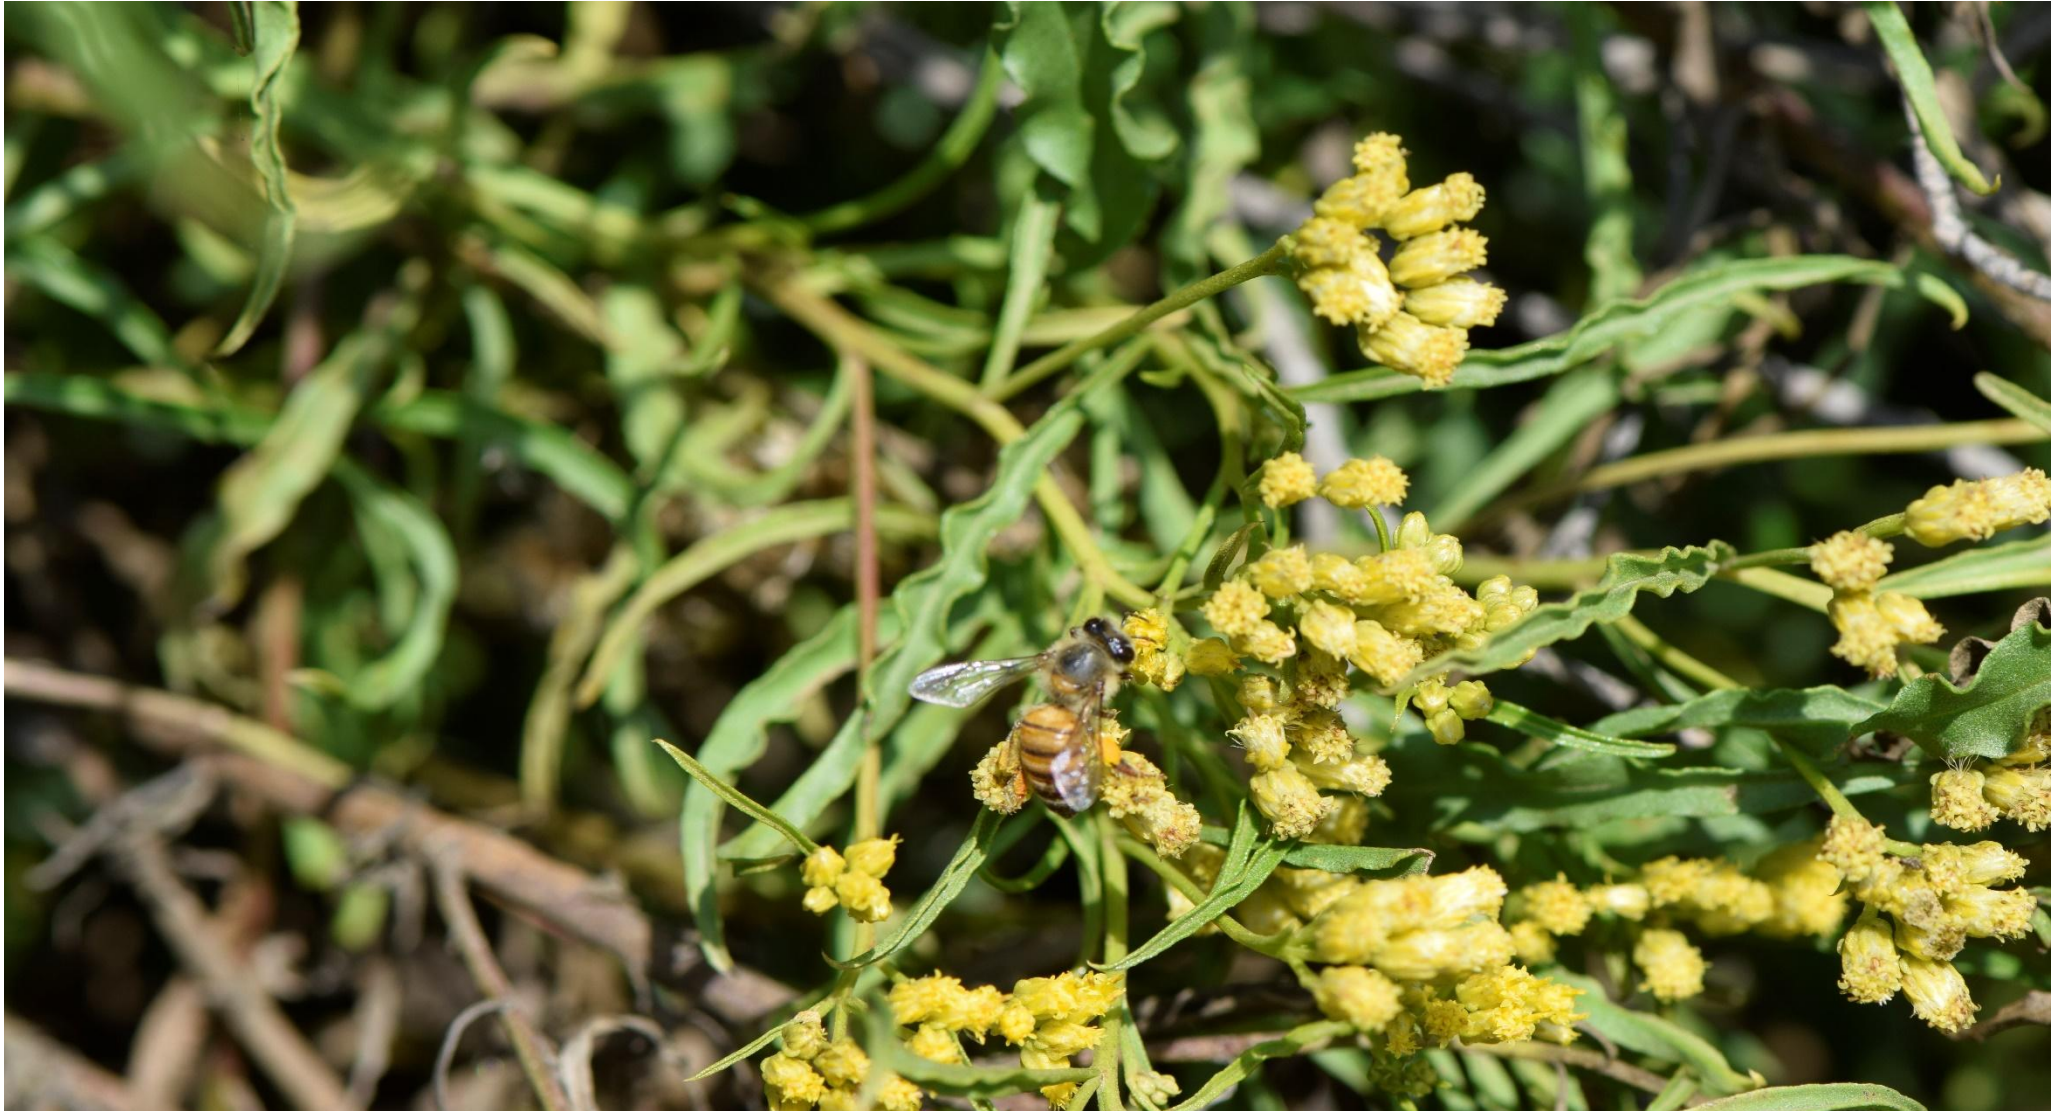



# *Pyrostria phyllanthoidea*

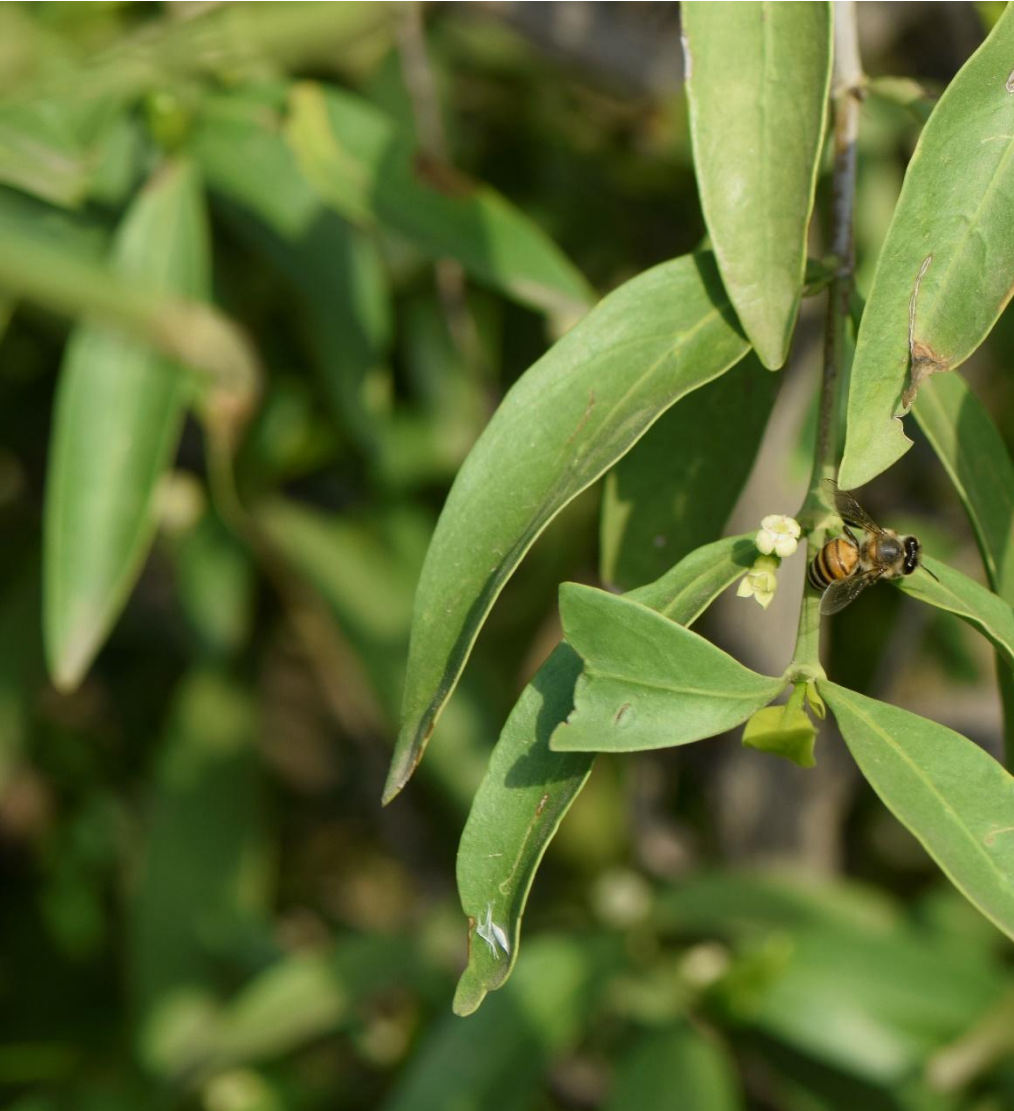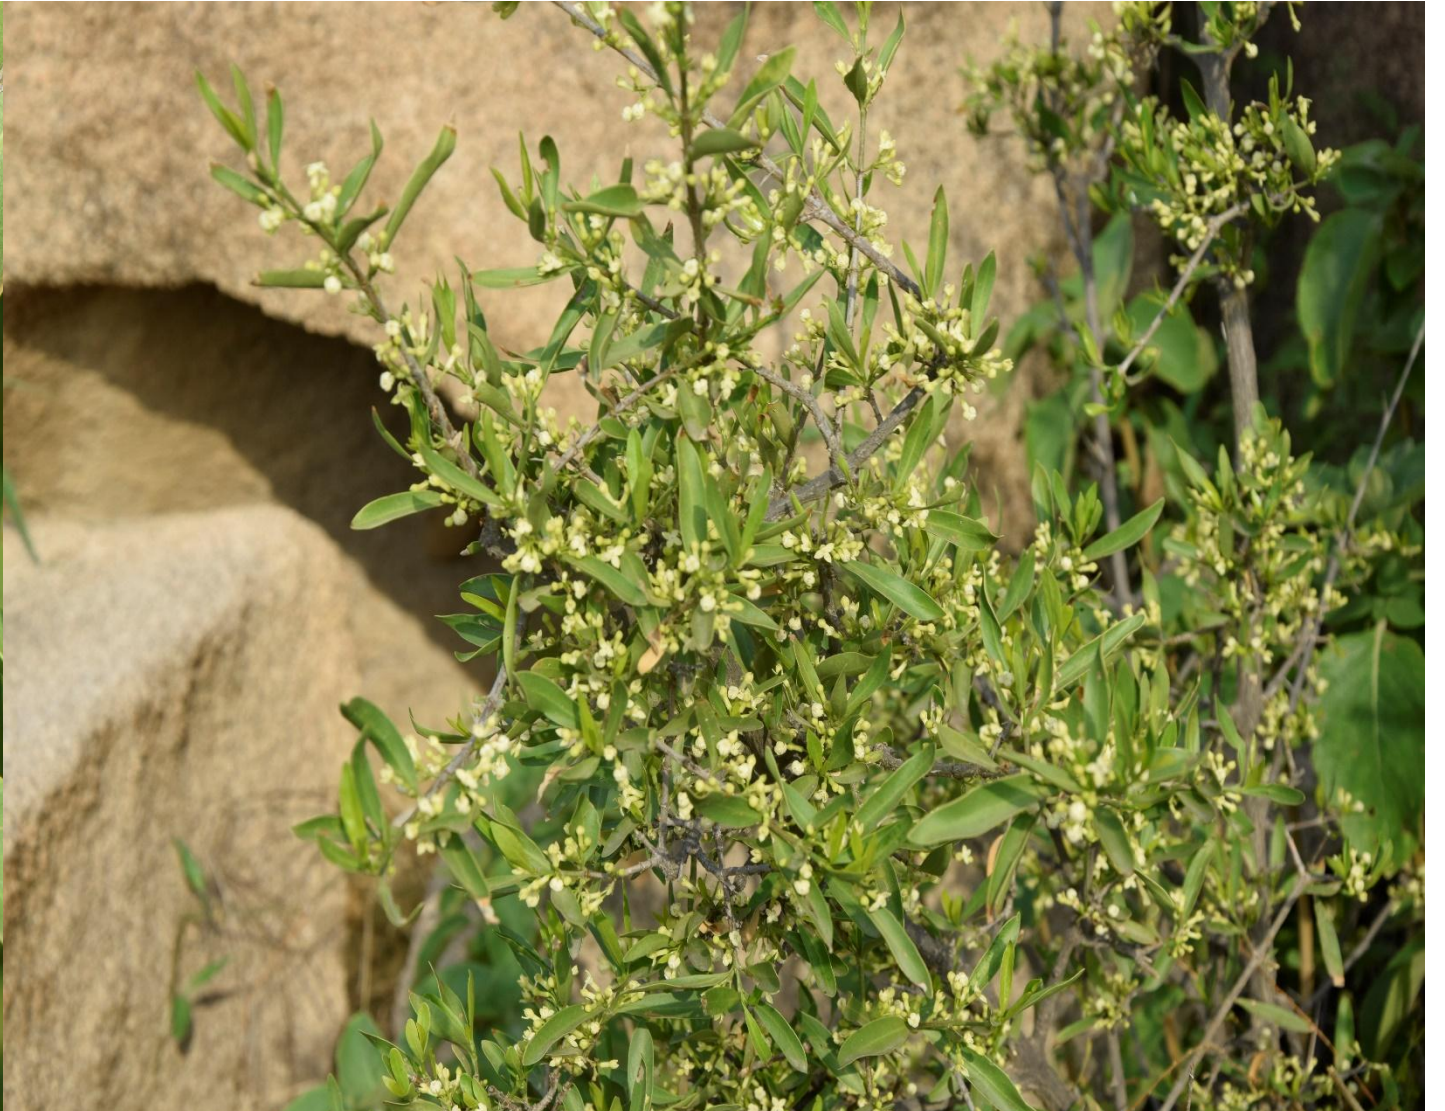



# *Rosa abyssinica*

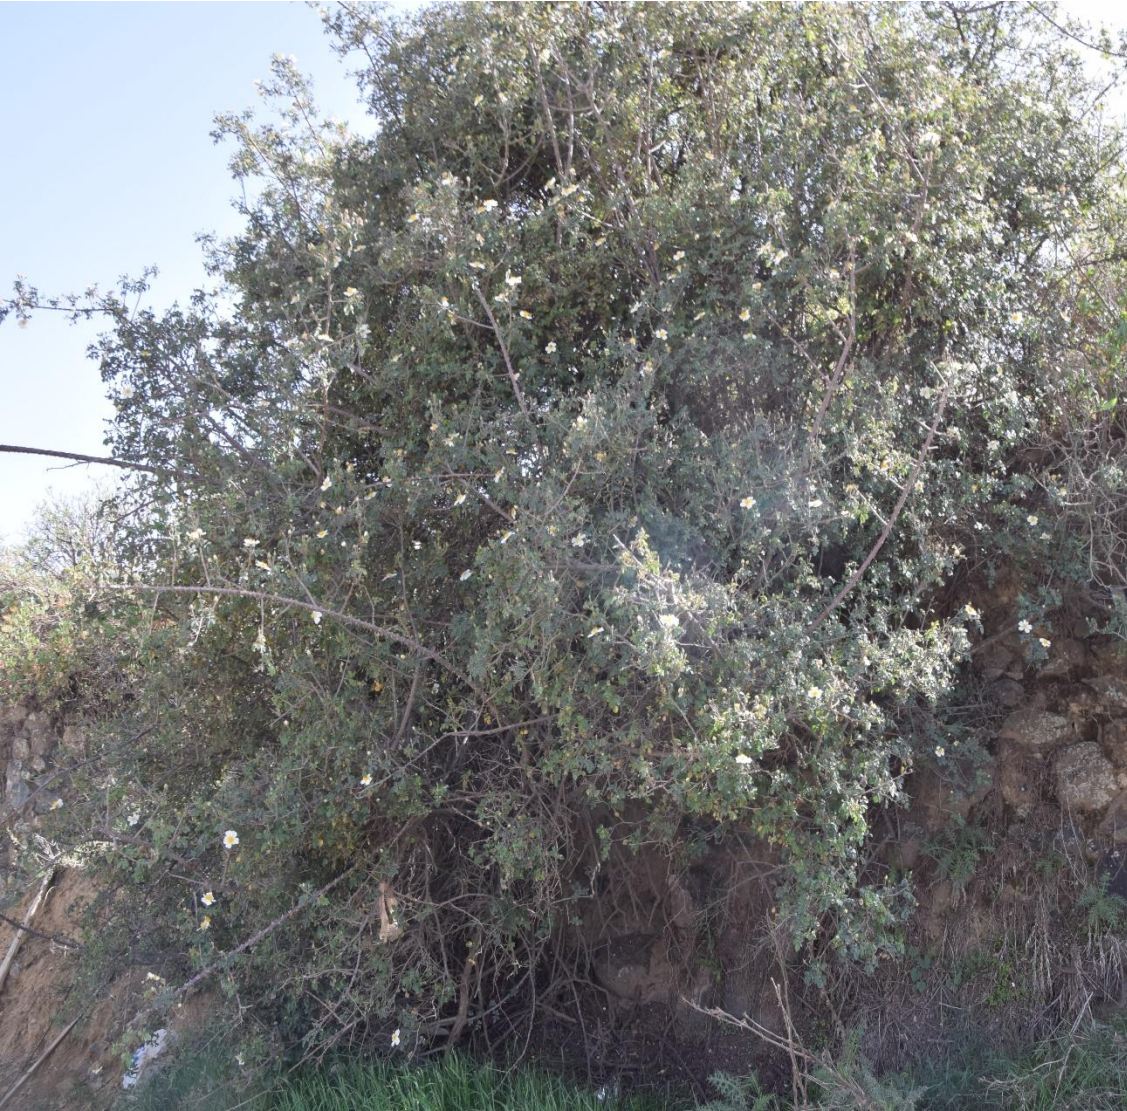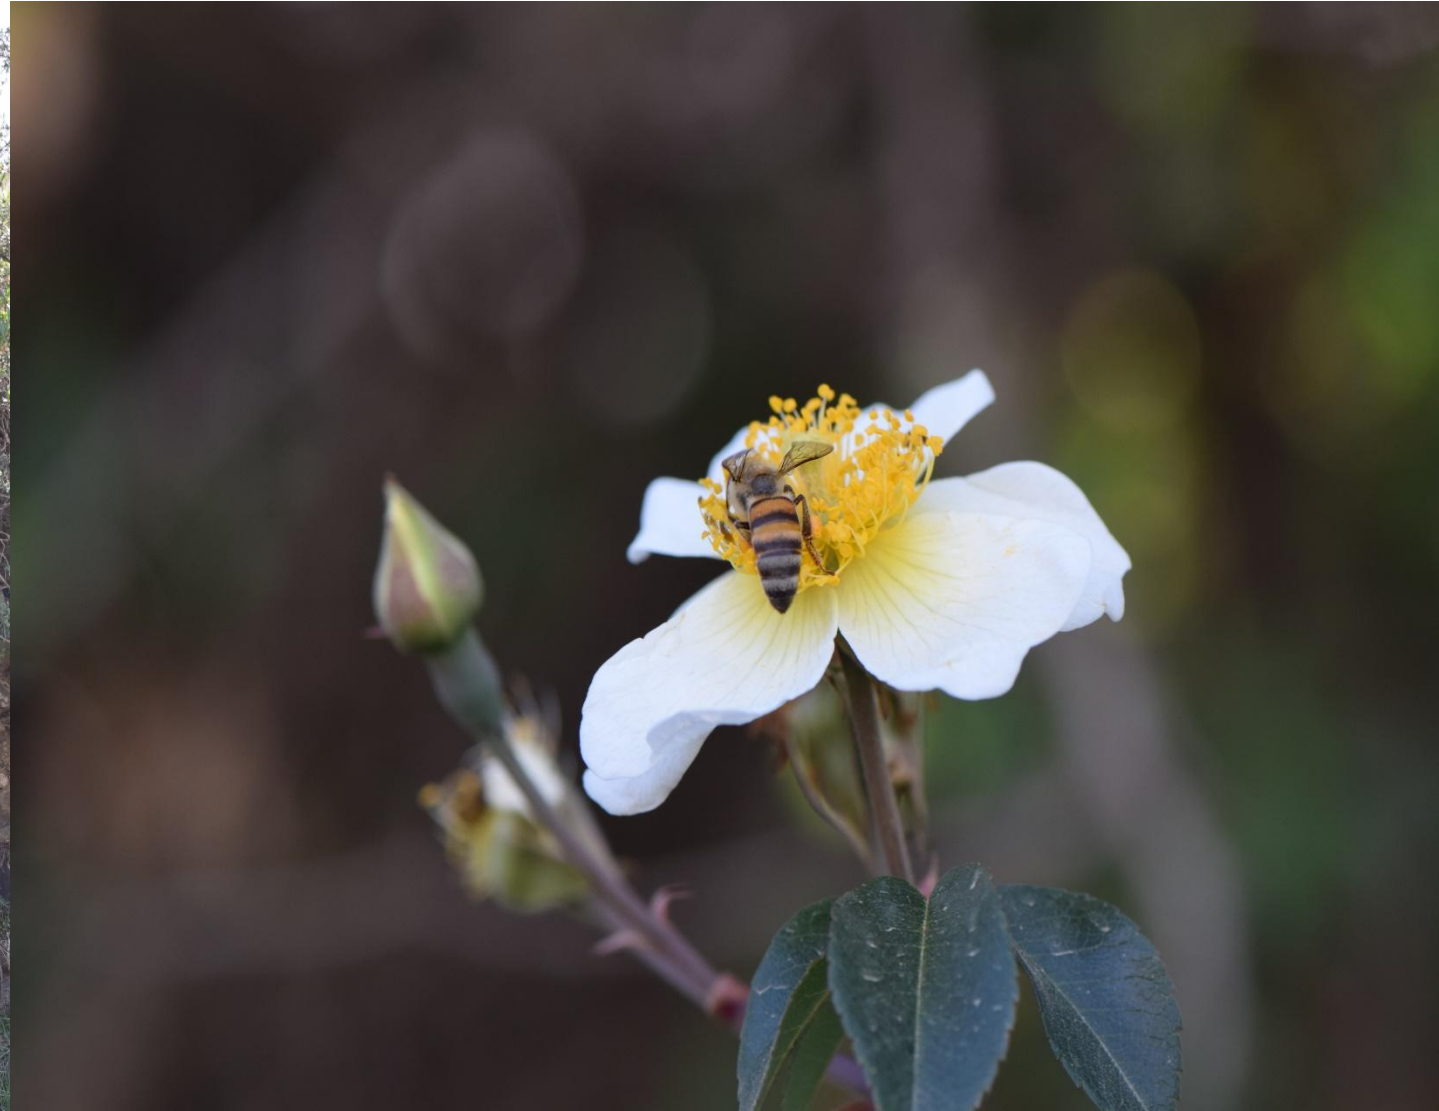



# ***Rubus creticus***

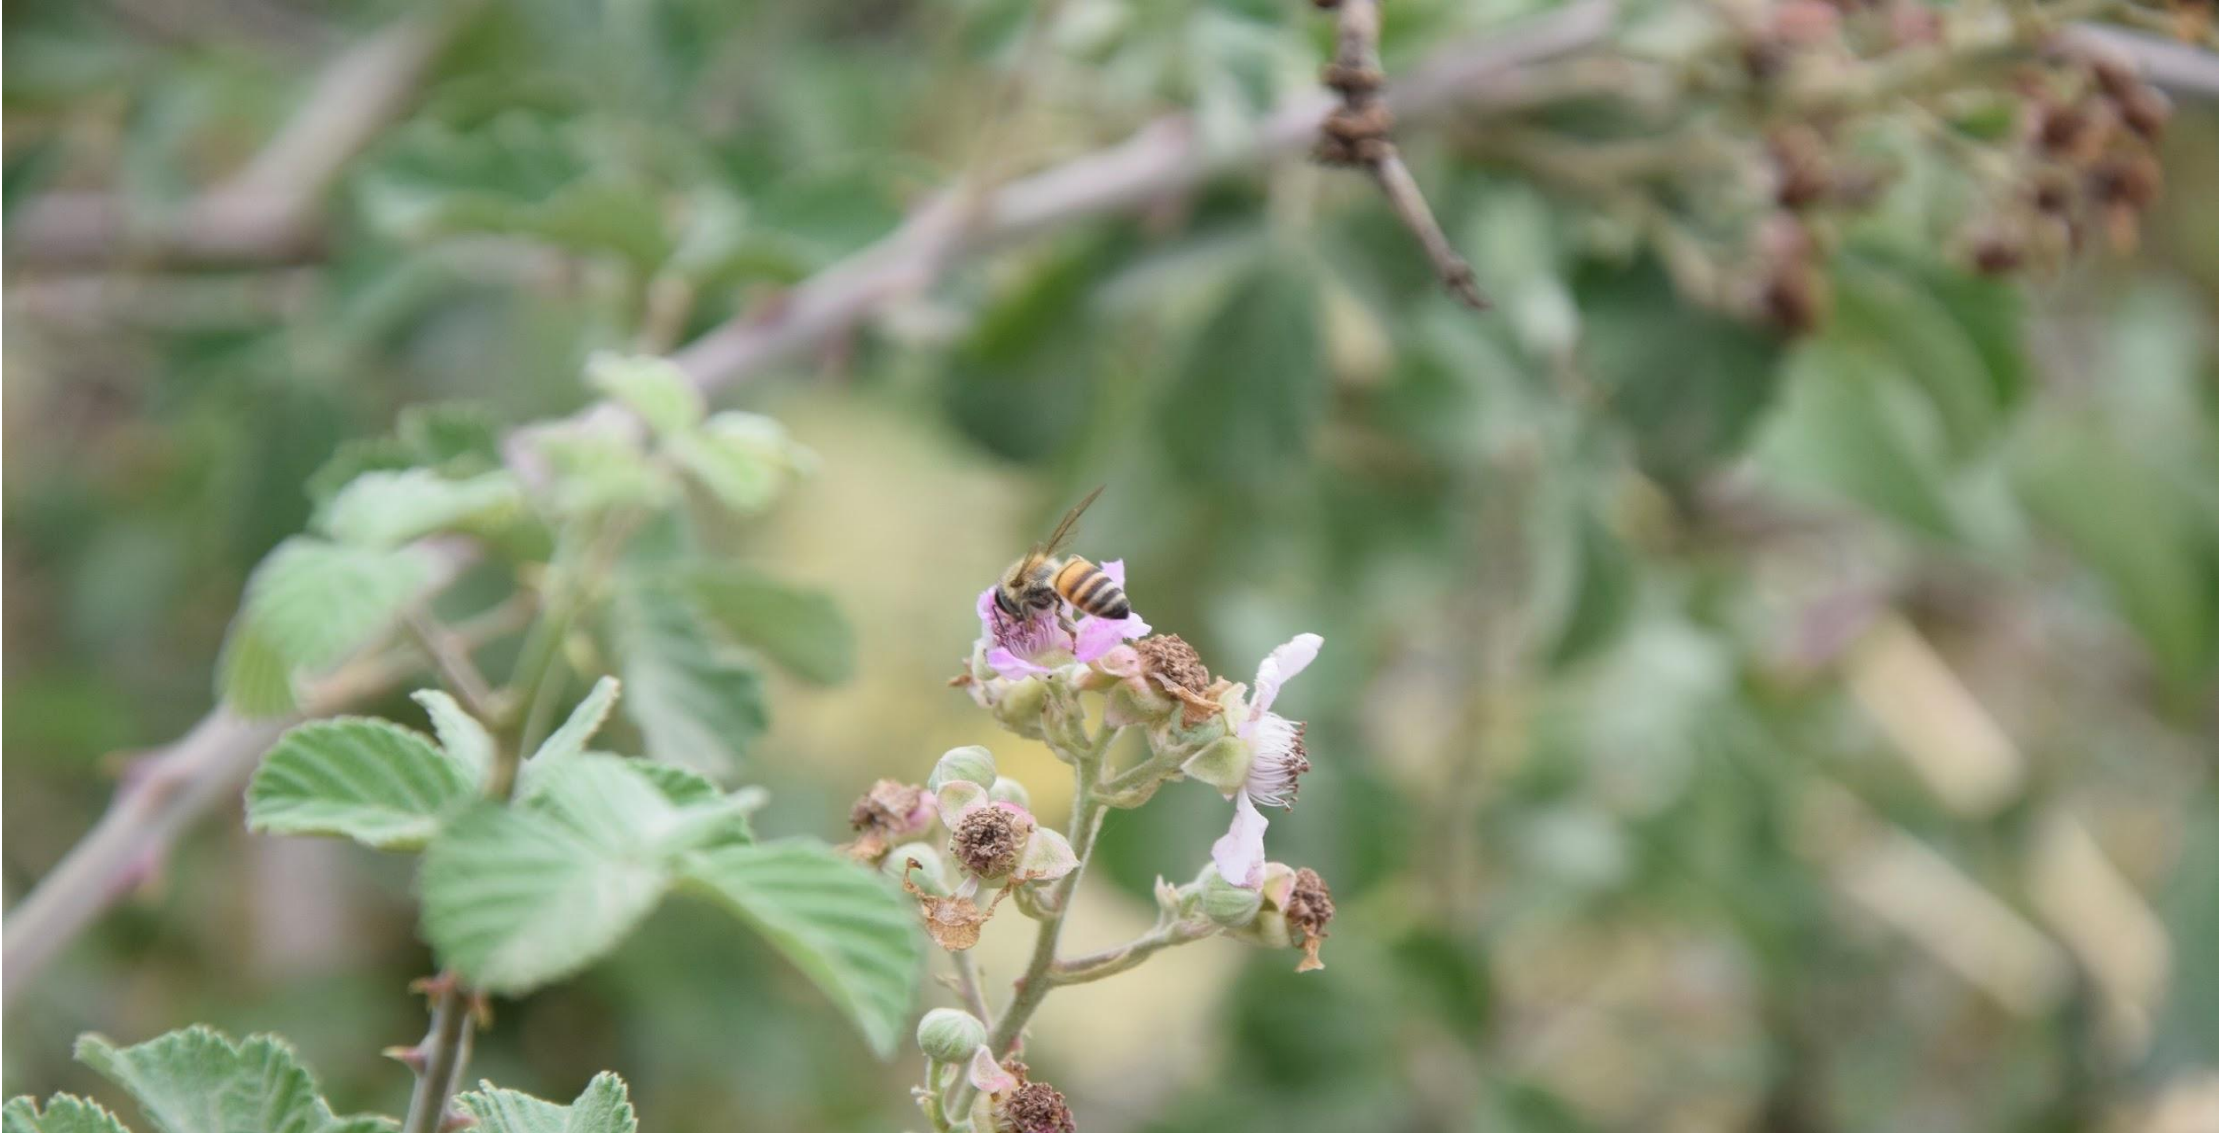



# *Rumex nervosus*

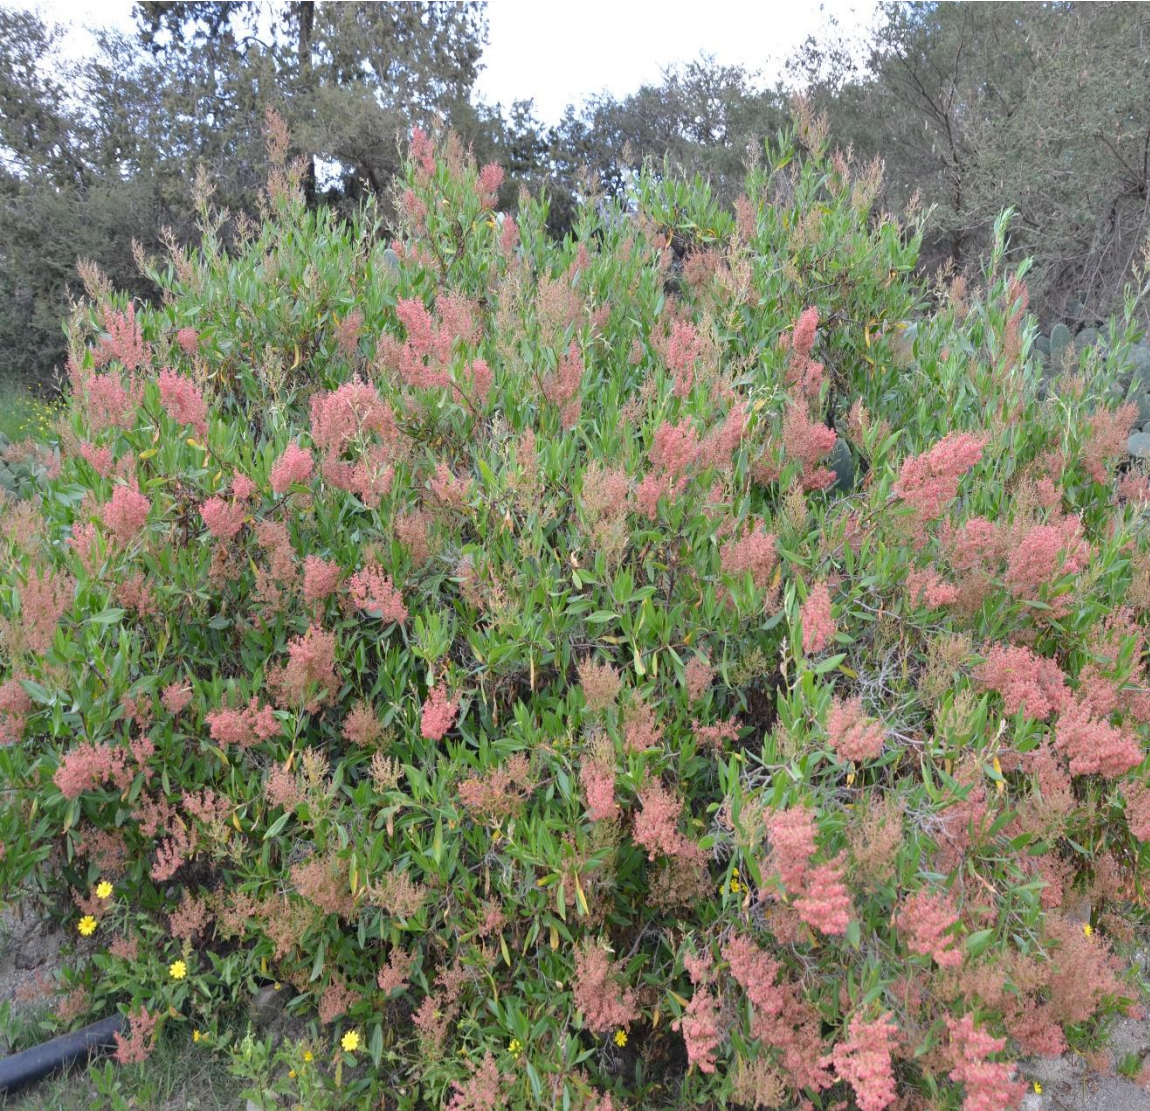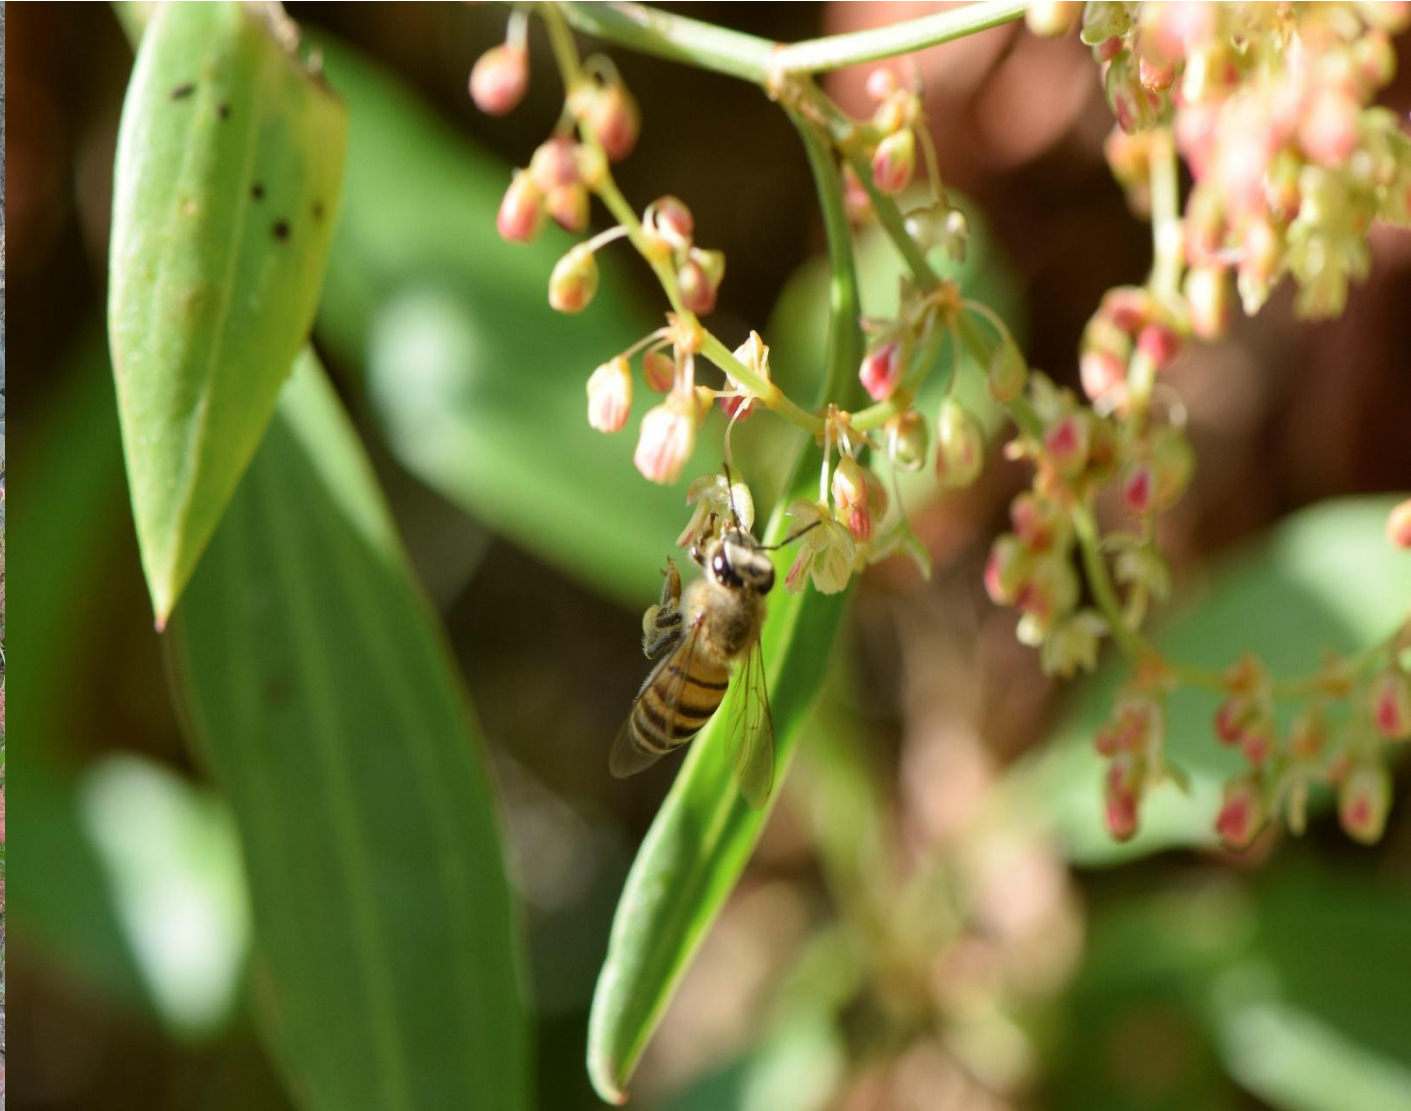



# *Segeretia thea*

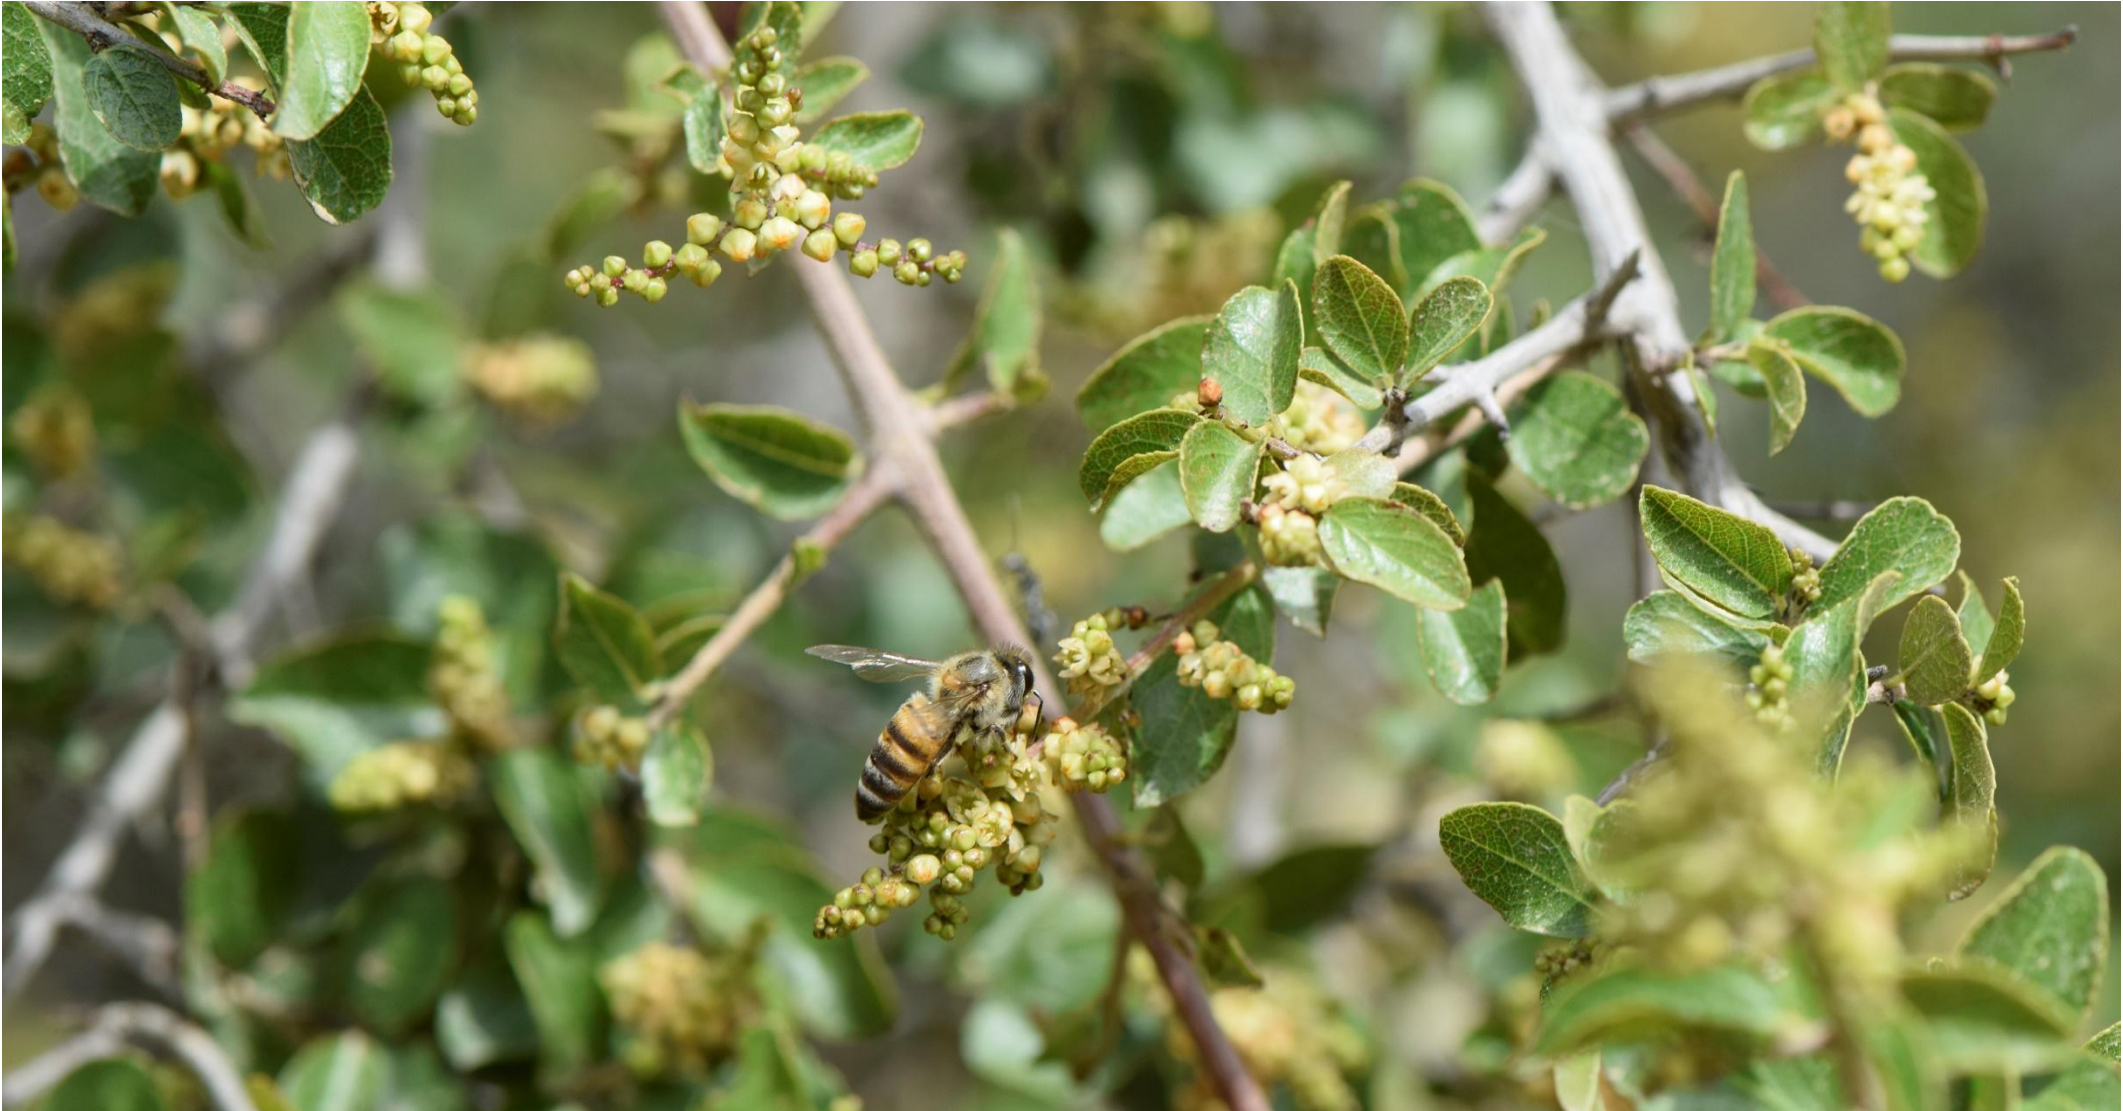



# ***Schweinfurthia pterosperma***

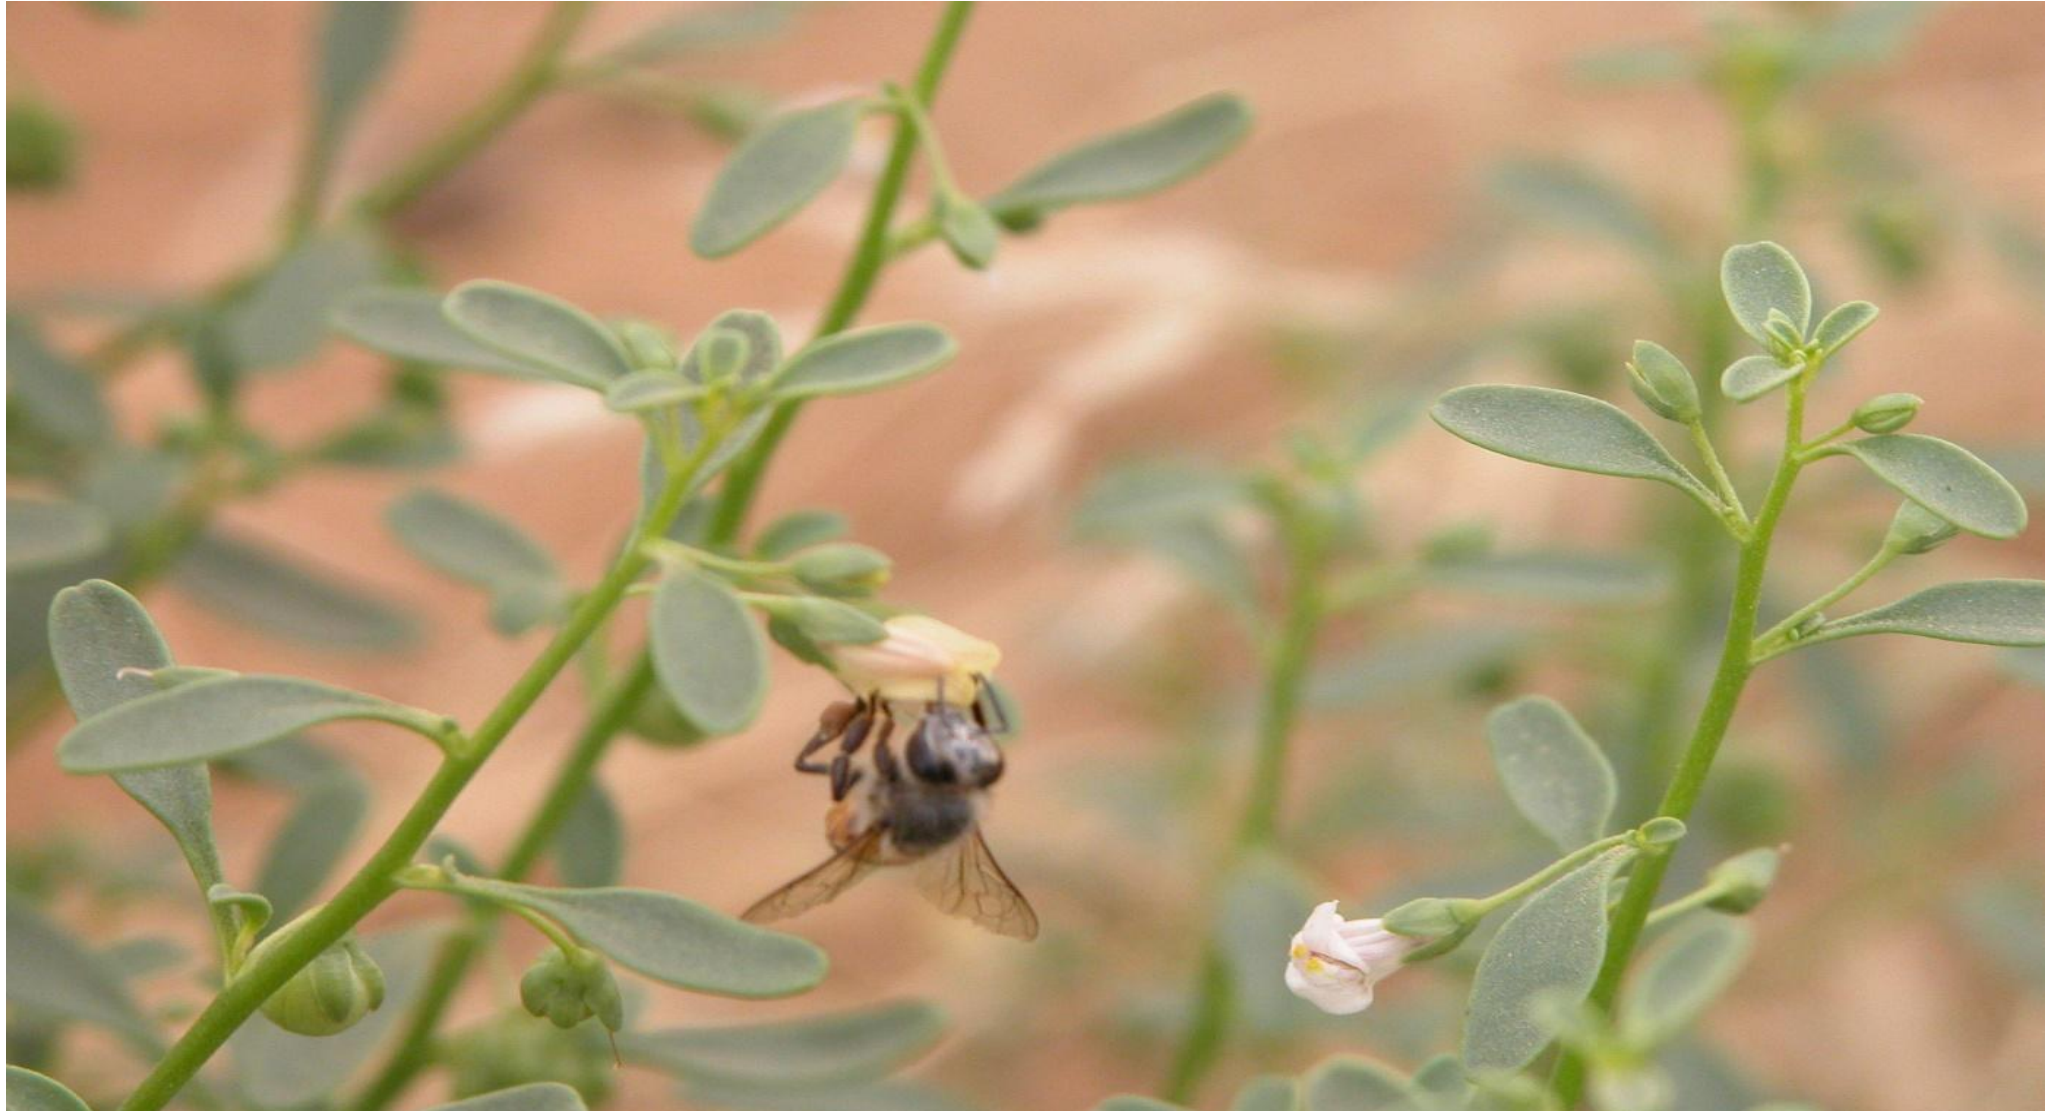



# *Acacia Oregina*

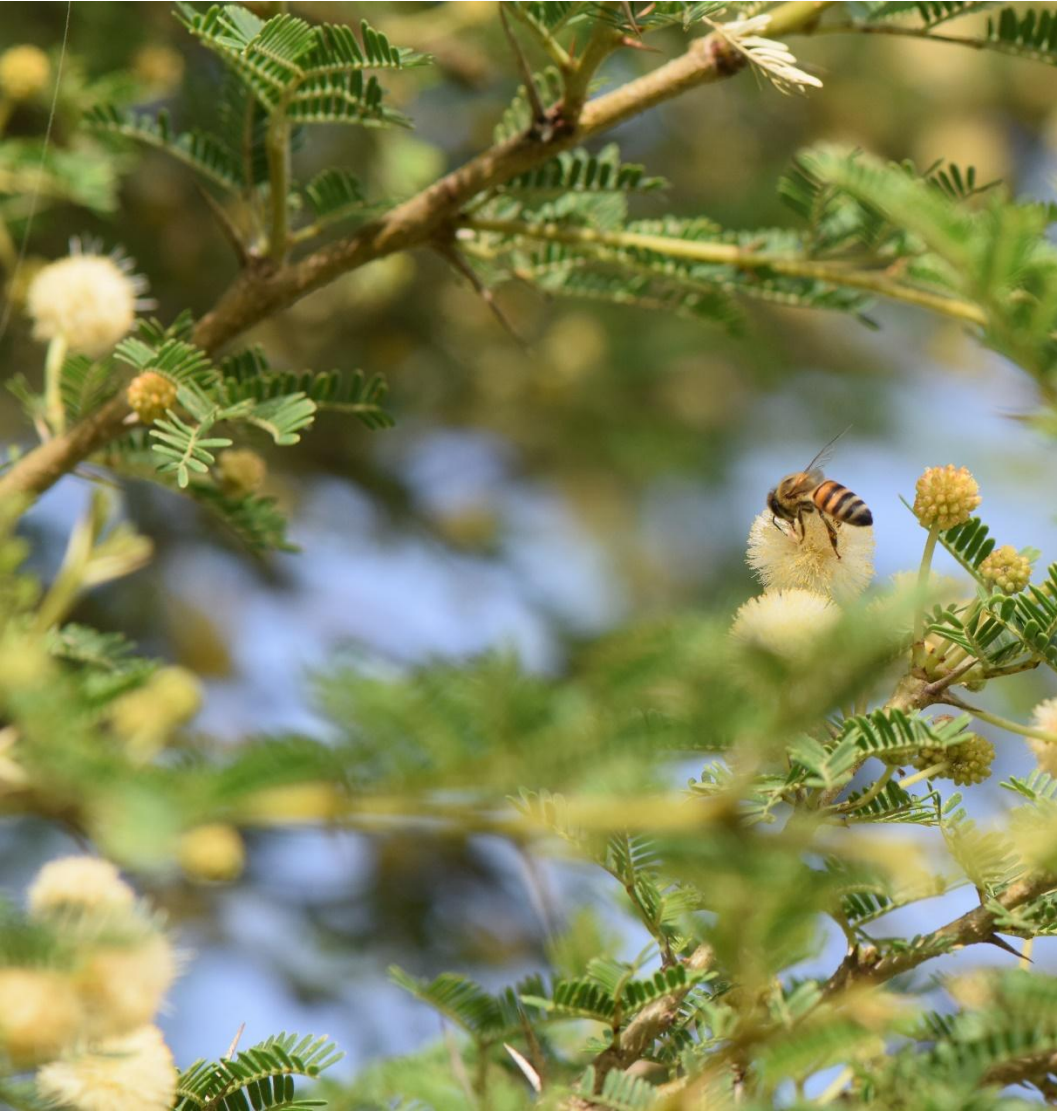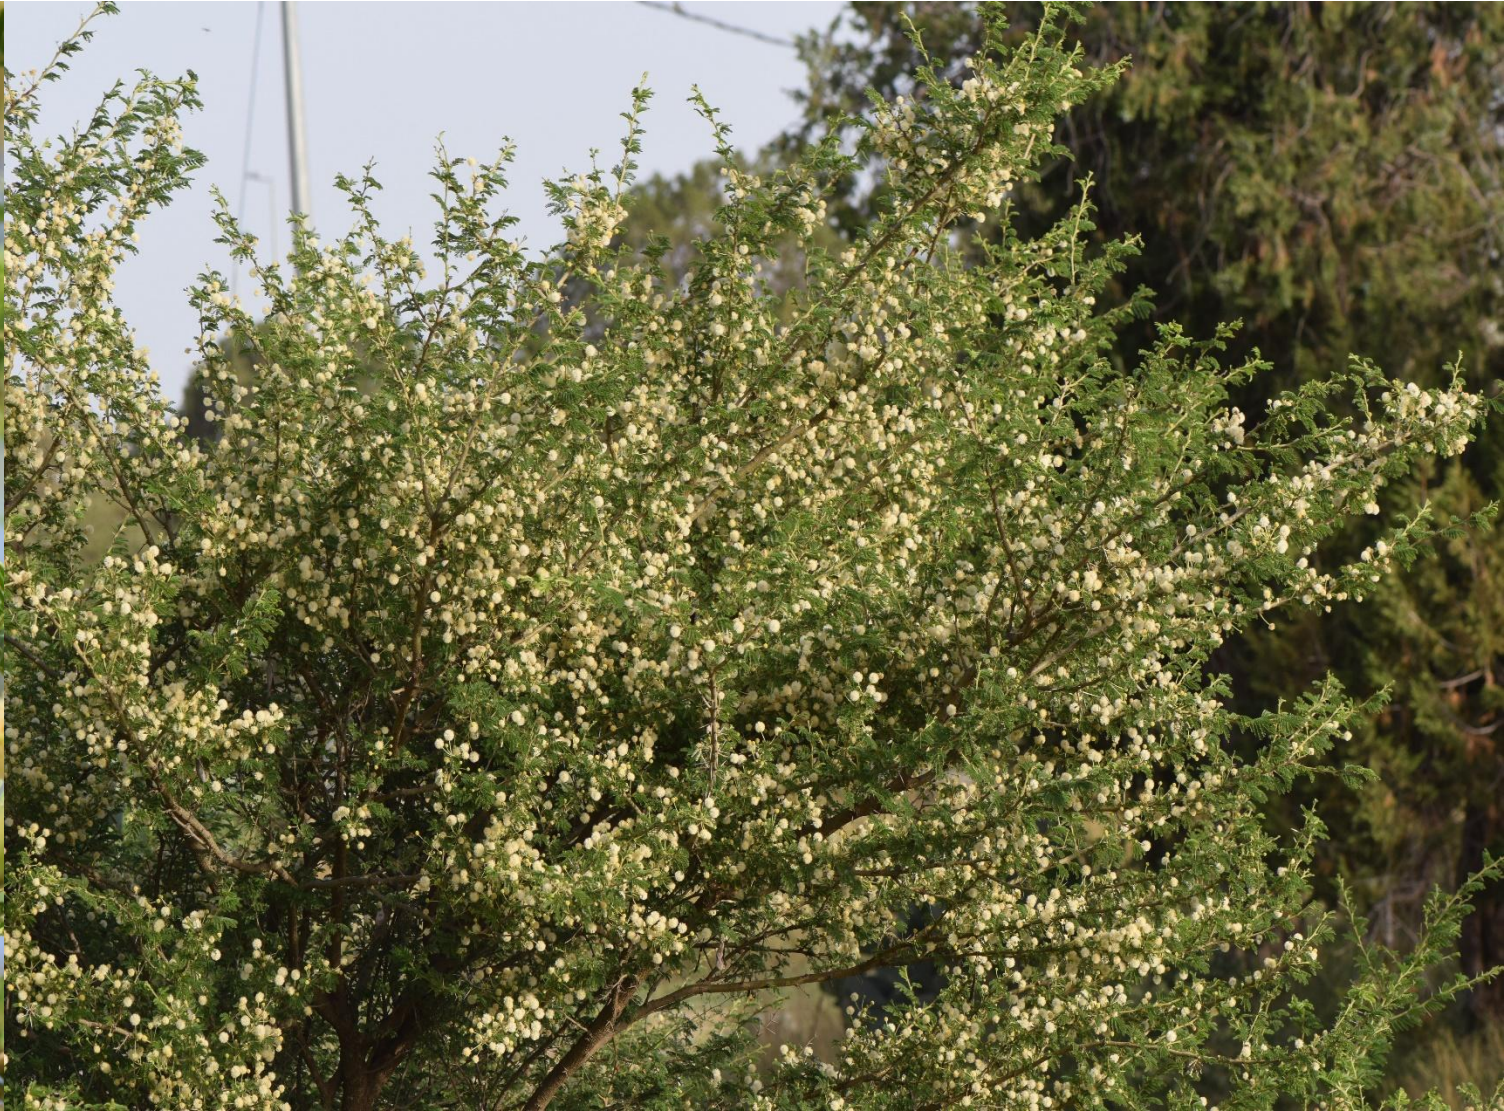

Supplement: s1 [file s1]
